# Supplementary material for: Multiscale screening and identifying specific targets for artesunate in suppressing bladder cancer
Source: Front Pharmacol. 2025 Apr 15;16:1584502. doi: 10.3389/fphar.2025.1584502 (PMC12037512; doi:10.3389/fphar.2025.1584502)
Supplement: Supplementary file 2 [file Table2.xls]

## Sheet: Sheet2
Category	Term	Count	%	PValue	Genes	List Total	Pop Hits	Pop Total	Fold Enrichment	Bonferroni	Benjamini	FDR
GOTERM_BP_DIRECT	GO:0010628~positive regulation of gene expression	29	21.8045	1.02708e-17	CRP, GSK3B, TNF, RELA, GJA1, ERBB3, MYC, ERBB2, E2F1, AKT1, TGFB1, CDKN2A, EGF, NOS3, CAV1, MAPK14, F3, IL4, IL1A, AR, IFNG, IL1B, CDK1, MDM2, PPARG, FGFR4, TP53, PPARD, NFE2L2	133	519	19453	8.1727	2.45472e-14	1.78416e-14	1.59529e-14
GOTERM_BP_DIRECT	GO:0009410~response to xenobiotic stimulus	23	17.2932	1.49302e-17	IL10, JUN, TGFB1, MAOB, PRKCB, MMP2, VEGFC, FOS, PTGS2, SOD2, ACACB, TNF, RELA, MYC, CASP3, MDM2, BCL2, CDK1, HMOX1, PPARG, BAK1, TOP1, TP53	133	277	19453	12.1446	3.56831e-14	1.78416e-14	1.59529e-14
GOTERM_BP_DIRECT	GO:0001666~response to hypoxia	19	14.2857	1.82642e-16	TGFB1, VCAM1, NOS2, CAV1, MMP2, VEGFC, SOD2, TNF, HK2, CASP9, DPP4, IL1A, PLAU, CASP3, KCNMA1, CYP1A1, HMOX1, PPARA, MAP3K7	133	176	19453	15.7898	5.30687e-13	1.45505e-13	1.30102e-13
GOTERM_BP_DIRECT	GO:0043066~negative regulation of apoptotic process	28	21.0526	2.79669e-16	GSK3B, GSTP1, PTEN, XIAP, HSPB1, MPO, TNF, RELA, ERBB3, MYC, CASP3, ERBB2, AKT1, MCL1, IL10, HGF, SOD2, MMP9, IL2, NFKB1, IL4, BCL2, CDK1, MDM2, RAF1, TP53, NAIP, PPARD	133	540	19453	7.58402	7.9603e-13	1.67102e-13	1.49413e-13
GOTERM_BP_DIRECT	GO:0043065~positive regulation of apoptotic process	23	17.2932	9.78204e-16	TOP2A, JUN, TGFB1, CDKN2A, MMP2, PTGS2, TNF, MMP9, CASP9, CASP7, CASP8, CASP3, KCNMA1, E2F1, BCL2, BAX, CYP1B1, HMOX1, PPARG, BAK1, CTSD, TP53, MCL1	133	336	19453	10.0121	2.38809e-12	4.67582e-13	4.18084e-13
GOTERM_BP_DIRECT	GO:0006915~apoptotic process	28	21.0526	8.82318e-15	PTEN, CASP9, CASP7, CASP8, RASSF3, CASP3, CHEK1, BAK1, MAP3K7, MCL1, PARP1, CDKN2A, PRKCB, MAPK14, MMP9, NFKB1, NFKBIA, IL1A, IFNG, IL1B, BCL2, CDK1, MDM2, BAX, RAF1, TP53, NAIP, PPARD	133	619	19453	6.6161	2.09621e-11	3.51457e-12	3.14252e-12
GOTERM_BP_DIRECT	GO:0045893~positive regulation of transcription, DNA-templated	28	21.0526	4.29934e-13	CDKN1C, ELK1, TNF, RELA, RXRA, CHEK2, MYC, E2F1, SPP1, AKT1, IL10, JUN, TGFB1, CDKN2A, PRKCB, EGF, FOS, ESR2, NFKB1, IL4, CCNA2, AR, IL1B, CDK2, PPARG, PPARA, TP53, PPARD	133	728	19453	5.62551	1.02767e-09	1.46792e-10	1.31253e-10
GOTERM_BP_DIRECT	GO:0097192~extrinsic apoptotic signaling pathway in absence of ligand	10	7.5188	1.40741e-12	IL4, IL1A, GSK3B, ERBB3, IL1B, BCL2, BAX, BAK1, IL2, MCL1	133	35	19453	41.7895	3.36376e-09	4.20464e-10	3.75955e-10
GOTERM_BP_DIRECT	GO:0006954~inflammatory response	22	16.5414	1.79293e-12	CRP, TGFB1, VCAM1, NOS2, PTGER3, FOS, CXCL13, PTGS2, TNF, PIK3CG, RELA, NFKB1, PTGS1, C3, IL1A, IL1B, SPP1, OLR1, AKT1, MAP3K7, NAIP, NFE2L2	133	436	19453	7.38025	4.28503e-09	4.76123e-10	4.25722e-10
GOTERM_BP_DIRECT	GO:0008284~positive regulation of cell proliferation	24	18.0451	2.15493e-12	TGFB1, EGF, ODC1, PTEN, AKR1C3, IGF2, VEGFC, IL2, RELA, ADRA2A, DPP4, IL4, AR, IFNG, ERBB3, MYC, IL1B, ERBB2, CDK2, MDM2, BCL2, AKT1, HAS2, FGFR4	133	545	19453	6.44095	5.15031e-09	5.15028e-10	4.60508e-10
GOTERM_BP_DIRECT	GO:0008630~intrinsic apoptotic signaling pathway in response to DNA damage	10	7.5188	5.53482e-11	CASP9, CHEK2, BCL2, E2F1, BAX, HMOX1, BAK1, SOD2, TNF, MCL1	133	51	19453	28.6791	1.32282e-07	1.20257e-08	1.07526e-08
GOTERM_BP_DIRECT	GO:0071222~cellular response to lipopolysaccharide	15	11.2782	7.72278e-11	IL10, NOS2, GSTP1, MMP3, SERPINE1, CXCL13, MAPK14, TNF, MMP9, RELA, NFKB1, IL1A, CASP7, IL1B, PPARD	133	198	19453	11.0805	1.84575e-07	1.46541e-08	1.31029e-08
GOTERM_BP_DIRECT	GO:1902895~positive regulation of pri-miRNA transcription from RNA polymerase II promoter	10	7.5188	7.97086e-11	IL10, AR, JUN, TGFB1, MYC, PPARG, FOS, TNF, TP53, RELA	133	53	19453	27.5968	1.90504e-07	1.46541e-08	1.31029e-08
GOTERM_BP_DIRECT	GO:0045766~positive regulation of angiogenesis	14	10.5263	1.06096e-10	PRKCB, NOS3, HGF, SERPINE1, VEGFC, HSPB1, F3, HK2, C3, IL1A, IL1B, CYP1B1, HMOX1, NFE2L2	133	166	19453	12.3354	2.53569e-07	1.81121e-08	1.61948e-08
GOTERM_BP_DIRECT	GO:0071456~cellular response to hypoxia	13	9.77444	1.19774e-10	TGFB1, PTEN, FOS, PTGS2, CCNA2, MYC, MDM2, E2F1, BCL2, HMOX1, PPARG, TP53, PPARD	133	134	19453	14.1897	2.8626e-07	1.9084e-08	1.70638e-08
GOTERM_BP_DIRECT	GO:0045944~positive regulation of transcription from RNA polymerase II promoter	32	24.0602	1.40608e-10	TOP2A, ELK1, TNF, RELA, RXRA, MYC, E2F1, E2F2, AKT1, IL10, JUN, TGFB1, PARP1, CDKN2A, HGF, IGF2, FOS, MAPK14, IL2, ESR2, NFKB1, IL4, NFKBIA, IL1A, AR, IL1B, PPARG, RAF1, PPARA, TP53, PPARD, NFE2L2	133	1232	19453	3.79904	3.36053e-07	2.10033e-08	1.878e-08
GOTERM_BP_DIRECT	GO:0007507~heart development	15	11.2782	3.31651e-10	TGFB1, PCNA, MMP2, PTEN, SOD2, IL1A, CASP7, GJA1, CASP8, ERBB3, CASP3, ERBB2, PPARG, PPARA, PPARD	133	221	19453	9.92736	7.92646e-07	4.66263e-08	4.16905e-08
GOTERM_BP_DIRECT	GO:0032496~response to lipopolysaccharide	13	9.77444	4.13897e-10	VCAM1, MAOB, NOS2, NOS3, FOS, PTGS2, SOD2, MPO, CASP9, CASP8, IL1B, CASP3, CYP1A1	133	149	19453	12.7612	9.89212e-07	5.49563e-08	4.91387e-08
GOTERM_BP_DIRECT	GO:0010332~response to gamma radiation	8	6.01504	5.93298e-10	IL1A, PARP1, MYC, BCL2, BAX, BAK1, SOD2, TP53	133	28	19453	41.7895	1.41798e-06	7.46307e-08	6.67304e-08
GOTERM_BP_DIRECT	GO:0035994~response to muscle stretch	7	5.26316	3.12138e-09	NFKBIA, JUN, FOS, RAF1, MAPK14, RELA, NFKB1	133	20	19453	51.1921	7.46007e-06	3.73005e-07	3.33519e-07
GOTERM_BP_DIRECT	GO:0030335~positive regulation of cell migration	15	11.2782	3.87536e-09	TGFB1, F10, EGF, HGF, CAV1, MMP2, SOD2, F3, MMP9, ADRA2A, IL4, CLDN4, PLAU, IL1B, HAS2	133	267	19453	8.21703	9.26207e-06	4.41053e-07	3.94364e-07
GOTERM_BP_DIRECT	GO:0010629~negative regulation of gene expression	16	12.0301	4.59819e-09	GSK3B, TGFB1, NOS2, ACACB, TNF, NFKB1, GJA1, RBL1, IFNG, MYC, CDK1, AKT1, PPARG, BAK1, MAP3K7, XDH	133	319	19453	7.33608	1.09896e-05	4.81659e-07	4.30672e-07
GOTERM_BP_DIRECT	GO:0001934~positive regulation of protein phosphorylation	14	10.5263	4.73562e-09	TGFB1, HGF, IGF2, VEGFC, TNF, MMP9, C3, CCND3, IFNG, CHEK2, IL1B, ERBB2, AKT1, RAF1	133	226	19453	9.06055	1.13181e-05	4.81659e-07	4.30672e-07
GOTERM_BP_DIRECT	GO:0007568~aging	12	9.02256	4.98553e-09	IL10, CDKN1C, CASP9, TGFB1, VCAM1, MMP2, CYP1A1, FOS, BAK1, PTGS2, MPO, NFE2L2	133	147	19453	11.9398	1.19154e-05	4.81659e-07	4.30672e-07
GOTERM_BP_DIRECT	GO:0045471~response to ethanol	11	8.27068	5.03827e-09	VCAM1, CASP8, MAOB, PRKCB, MYC, CDK1, FOS, BAK1, PPARA, TNF, IL2	133	113	19453	14.238	1.20414e-05	4.81659e-07	4.30672e-07
GOTERM_BP_DIRECT	GO:0071356~cellular response to tumor necrosis factor	11	8.27068	3.98908e-08	NFKBIA, VCAM1, CYP1B1, HAS2, AKT1, FOS, MAPK14, MAP3K7, RELA, NFKB1, NFE2L2	133	140	19453	11.4921	9.53346e-05	3.66689e-06	3.27872e-06
GOTERM_BP_DIRECT	GO:0010575~positive regulation of vascular endothelial growth factor production	7	5.26316	5.57749e-08	C3, IL1A, TGFB1, IL1B, CYP1B1, PTGS2, RELA	133	31	19453	33.0272	0.000133293	4.93711e-06	4.41448e-06
GOTERM_BP_DIRECT	GO:0000122~negative regulation of transcription from RNA polymerase II promoter	25	18.797	7.93421e-08	CDKN1C, PCNA, TNF, RELA, CCND3, RXRA, MYC, E2F1, JUN, TGFB1, PARP1, CAV1, IGF2, ESR2, NFKB1, IL4, AR, RBL1, IFNG, CDK2, MDM2, PPARG, PPARA, TP53, PPARD	133	1016	19453	3.599	0.00018961	6.77241e-06	6.0555e-06
GOTERM_BP_DIRECT	GO:1904707~positive regulation of vascular smooth muscle cell proliferation	8	6.01504	8.73398e-08	IL10, GJA1, JUN, MMP2, MDM2, TNF, MAP3K7, MMP9	133	55	19453	21.2746	0.00020872	6.95807e-06	6.22151e-06
GOTERM_BP_DIRECT	GO:0031334~positive regulation of protein complex assembly	8	6.01504	8.73398e-08	GSK3B, TGFB1, IFNG, MMP1, MMP3, BAX, BAK1, TNF	133	55	19453	21.2746	0.00020872	6.95807e-06	6.22151e-06
GOTERM_BP_DIRECT	GO:0043154~negative regulation of cysteine-type endopeptidase activity involved in apoptotic process	8	6.01504	9.92568e-08	POR, HGF, XIAP, AKT1, RAF1, PTGS2, TNF, NAIP	133	56	19453	20.8947	0.000237196	7.44798e-06	6.65956e-06
GOTERM_BP_DIRECT	GO:0008285~negative regulation of cell proliferation	17	12.782	9.9722e-08	IL10, JUN, TGFB1, CDKN2A, NOS3, PTEN, PTGS2, SOD2, IL1A, AR, RASSF3, IL1B, CYP1B1, IGFBP6, BAK1, RAF1, TP53	133	462	19453	5.38198	0.000238307	7.44798e-06	6.65956e-06
GOTERM_BP_DIRECT	GO:0071276~cellular response to cadmium ion	7	5.26316	1.43506e-07	JUN, CYP1A2, AKR1C3, HMOX1, AKT1, FOS, MMP9	133	36	19453	28.4401	0.000342919	1.03933e-05	9.29307e-06
GOTERM_BP_DIRECT	GO:0001525~angiogenesis	13	9.77444	1.72565e-07	JUN, NOS3, EGF, CAV1, MMP2, SERPINE1, PTEN, PTGS2, MAPK14, PIK3CG, CASP8, CYP1B1, HMOX1	133	255	19453	7.45655	0.000412346	1.21303e-05	1.08462e-05
GOTERM_BP_DIRECT	GO:0034644~cellular response to UV	8	6.01504	1.81537e-07	CASP9, PCNA, PARP1, MYC, BAX, BAK1, PTGS2, TP53	133	61	19453	19.1821	0.000433778	1.23964e-05	1.10841e-05
GOTERM_BP_DIRECT	GO:2000573~positive regulation of DNA biosynthetic process	6	4.51128	1.9046e-07	CCNA2, MYC, HGF, CYP1B1, FGFR4, TNF	133	20	19453	43.8789	0.000455095	1.26444e-05	1.13059e-05
GOTERM_BP_DIRECT	GO:0042127~regulation of cell proliferation	11	8.27068	3.25223e-07	NFKBIA, CCND3, JUN, TGFB1, ERBB3, NOS2, PLAU, ERBB2, CHEK1, XIAP, PTGS1	133	175	19453	9.19368	0.00077698	2.10076e-05	1.87838e-05
GOTERM_BP_DIRECT	GO:0031663~lipopolysaccharide-mediated signaling pathway	7	5.26316	3.73818e-07	NFKBIA, TGFB1, NOS3, IL1B, AKT1, MAPK14, TNF	133	42	19453	24.3772	0.000893026	2.35112e-05	2.10223e-05
GOTERM_BP_DIRECT	GO:0044346~fibroblast apoptotic process	5	3.7594	4.12131e-07	CASP9, CASP7, MYC, CASP3, BAK1	133	10	19453	73.1316	0.000984509	2.52563e-05	2.25827e-05
GOTERM_BP_DIRECT	GO:0001836~release of cytochrome c from mitochondria	6	4.51128	5.10891e-07	BCL2, BAX, BAK1, SOD2, TP53, MCL1	133	24	19453	36.5658	0.00122028	3.04937e-05	2.72657e-05
GOTERM_BP_DIRECT	GO:0071466~cellular response to xenobiotic stimulus	8	6.01504	5.23113e-07	PCNA, NOS2, CHEK2, MYC, IL1B, E2F1, TP53, NFE2L2	133	71	19453	16.4804	0.00124946	3.04937e-05	2.72657e-05
GOTERM_BP_DIRECT	GO:0071407~cellular response to organic cyclic compound	7	5.26316	8.45819e-07	TGFB1, CASP8, IL1B, CYP1A1, CDK1, CYP1B1, TNF	133	48	19453	21.33	0.00201947	4.81311e-05	4.30361e-05
GOTERM_BP_DIRECT	GO:0014823~response to activity	7	5.26316	1.08318e-06	IL10, MMP2, CDK1, FOS, SOD2, TNF, PPARD	133	50	19453	20.4768	0.00258545	6.02046e-05	5.38315e-05
GOTERM_BP_DIRECT	GO:1902042~negative regulation of extrinsic apoptotic signaling pathway via death domain receptors	6	4.51128	1.15586e-06	GSK3B, NOS3, HGF, SERPINE1, HMOX1, RAF1	133	28	19453	31.3421	0.0027587	6.27843e-05	5.61381e-05
GOTERM_BP_DIRECT	GO:0009636~response to toxic substance	8	6.01504	1.29299e-06	MAOB, PON1, MDM2, BCL2, CDK1, BAX, CYP1B1, FOS	133	81	19453	14.4457	0.00308548	6.71794e-05	6.00679e-05
GOTERM_BP_DIRECT	GO:0043491~protein kinase B signaling	8	6.01504	1.29299e-06	TGFB1, ERBB3, IL1B, ERBB2, PTEN, AKT1, TNF, PIK3CG	133	81	19453	14.4457	0.00308548	6.71794e-05	6.00679e-05
GOTERM_BP_DIRECT	GO:0043123~positive regulation of I-kappaB kinase/NF-kappaB signaling	11	8.27068	1.38607e-06	IL1A, GJA1, CASP8, PARP1, PRKCB, IL1B, HMOX1, XIAP, TNF, MAP3K7, RELA	133	205	19453	7.84827	0.00330724	6.85661e-05	6.13078e-05
GOTERM_BP_DIRECT	GO:0006919~activation of cysteine-type endopeptidase activity involved in apoptotic process	8	6.01504	1.40575e-06	CASP9, CASP8, CDKN2A, BAX, PPARG, TNF, F3, XDH	133	82	19453	14.2696	0.0033541	6.85661e-05	6.13078e-05
GOTERM_BP_DIRECT	GO:0051402~neuron apoptotic process	8	6.01504	1.40575e-06	CASP9, CASP7, ERBB3, CASP3, BCL2, BAX, XIAP, TP53	133	82	19453	14.2696	0.0033541	6.85661e-05	6.13078e-05
GOTERM_BP_DIRECT	GO:0034614~cellular response to reactive oxygen species	7	5.26316	1.53904e-06	JUN, MMP2, MMP3, AKR1C3, AKT1, FOS, MMP9	133	53	19453	19.3178	0.00367155	7.35662e-05	6.57786e-05
GOTERM_BP_DIRECT	GO:0046677~response to antibiotic	6	4.51128	2.31737e-06	CASP9, CASP8, CASP3, MDM2, CYP1A1, TP53	133	32	19453	27.4243	0.00552322	0.000108599	9.71025e-05
GOTERM_BP_DIRECT	GO:0000086~G2/M transition of mitotic cell cycle	7	5.26316	2.63918e-06	CCNA2, CCNB1, CHEK2, CHEK1, CDK2, CDK1, CALM2	133	58	19453	17.6525	0.00628779	0.000121301	0.00010846
GOTERM_BP_DIRECT	GO:0006508~proteolysis	15	11.2782	2.87257e-06	F10, MMP1, MMP2, MMP3, PCOLCE, F3, MMP9, DPP4, C3, CASP7, CASP8, PLAU, CASP3, OLR1, CTSD	133	458	19453	4.79028	0.00684195	0.000129537	0.000115824
GOTERM_BP_DIRECT	GO:0031622~positive regulation of fever generation	4	3.00752	3.02388e-06	IL1B, PTGER3, PTGS2, TNF	133	5	19453	117.011	0.00720104	0.000133835	0.000119667
GOTERM_BP_DIRECT	GO:2000379~positive regulation of reactive oxygen species metabolic process	6	4.51128	3.16744e-06	AKR1C3, CYP1B1, MAPK14, TP53, XDH, NFE2L2	133	34	19453	25.8111	0.00754161	0.00013764	0.000123069
GOTERM_BP_DIRECT	GO:0090399~replicative senescence	5	3.7594	3.46061e-06	CDKN2A, CHEK2, CHEK1, SERPINE1, TP53	133	16	19453	45.7072	0.00823677	0.000145103	0.000129743
GOTERM_BP_DIRECT	GO:0051146~striated muscle cell differentiation	5	3.7594	3.46061e-06	CASP7, CASP3, IGF2, AKT1, MAPK14	133	16	19453	45.7072	0.00823677	0.000145103	0.000129743
GOTERM_BP_DIRECT	GO:0097421~liver regeneration	6	4.51128	4.24495e-06	IL10, TGFB1, PCNA, MYC, HMOX1, TNF	133	36	19453	24.3772	0.0100942	0.000174921	0.000156404
GOTERM_BP_DIRECT	GO:0018105~peptidyl-serine phosphorylation	10	7.5188	4.65511e-06	GSK3B, PRKCB, CHEK2, CDK2, BCL2, CDK1, AKT1, TOP1, MAPK14, PRKACA	133	184	19453	7.94908	0.0110641	0.000182298	0.000163
GOTERM_BP_DIRECT	GO:0007249~I-kappaB kinase/NF-kappaB signaling	7	5.26316	4.72866e-06	NFKBIA, IL1B, AKT1, TNF, MAP3K7, RELA, NFKB1	133	64	19453	15.9975	0.0112379	0.000182298	0.000163
GOTERM_BP_DIRECT	GO:0051897~positive regulation of protein kinase B signaling	10	7.5188	4.86538e-06	TGFB1, ERBB3, F10, EGF, HGF, AKR1C3, IGF2, TNF, F3, PIK3CG	133	185	19453	7.90612	0.0115609	0.000182298	0.000163
GOTERM_BP_DIRECT	GO:1901216~positive regulation of neuron death	6	4.51128	4.88161e-06	GSK3B, CASP8, IFNG, PARP1, FOS, ELK1	133	37	19453	23.7183	0.0115993	0.000182298	0.000163
GOTERM_BP_DIRECT	GO:2001240~negative regulation of extrinsic apoptotic signaling pathway in absence of ligand	6	4.51128	4.88161e-06	IL1A, IL1B, BCL2, AKT1, TNF, MCL1	133	37	19453	23.7183	0.0115993	0.000182298	0.000163
GOTERM_BP_DIRECT	GO:0048147~negative regulation of fibroblast proliferation	6	4.51128	4.88161e-06	MYC, GSTP1, CAV1, BAX, SOD2, TP53	133	37	19453	23.7183	0.0115993	0.000182298	0.000163
GOTERM_BP_DIRECT	GO:0006006~glucose metabolic process	7	5.26316	5.18074e-06	MYC, IGF2, AKT1, MAPK14, TNF, HK2, PPARD	133	65	19453	15.7514	0.0123057	0.000190492	0.000170327
GOTERM_BP_DIRECT	GO:0002931~response to ischemia	7	5.26316	5.66731e-06	CASP9, CAV1, BCL2, TP53, RELA, HK2, NFE2L2	133	66	19453	15.5128	0.0134536	0.000202356	0.000180935
GOTERM_BP_DIRECT	GO:0032355~response to estradiol	8	6.01504	5.71597e-06	CASP9, TGFB1, PCNA, CASP8, MYC, CASP3, CYP1B1, PTGS2	133	101	19453	11.5852	0.0135683	0.000202356	0.000180935
GOTERM_BP_DIRECT	GO:1904385~cellular response to angiotensin	5	3.7594	5.75742e-06	MYC, MAP3K7, RELA, NFKB1, NFE2L2	133	18	19453	40.6287	0.013666	0.000202356	0.000180935
GOTERM_BP_DIRECT	GO:1904019~epithelial cell apoptotic process	5	3.7594	7.25443e-06	CASP9, CASP3, BCL2, BAX, HMOX1	133	19	19453	38.4903	0.0171887	0.000251088	0.000224508
GOTERM_BP_DIRECT	GO:0000082~G1/S transition of mitotic cell cycle	7	5.26316	7.35403e-06	CCNA2, CCND3, MYC, CDK2, BCL2, CDK1, E2F1	133	69	19453	14.8383	0.0174226	0.000251088	0.000224508
GOTERM_BP_DIRECT	GO:0001819~positive regulation of cytokine production	7	5.26316	7.99901e-06	IL10, IL1A, IFNG, IL1B, TNF, ADRA2A, PIK3CG	133	70	19453	14.6263	0.0189361	0.000269263	0.000240759
GOTERM_BP_DIRECT	GO:0050729~positive regulation of inflammatory response	8	6.01504	1.27122e-05	NFKBIA, TGFB1, IFNG, IL1B, SERPINE1, TNF, IL2, NAIP	133	114	19453	10.2641	0.0299255	0.000421975	0.000377306
GOTERM_BP_DIRECT	GO:0042542~response to hydrogen peroxide	6	4.51128	1.31004e-05	CASP3, MMP2, BCL2, HMOX1, BAK1, SOD2	133	45	19453	19.5018	0.030825	0.000423107	0.000378318
GOTERM_BP_DIRECT	GO:0007566~embryo implantation	6	4.51128	1.31004e-05	IL1B, MMP2, SPP1, PTGS2, MMP9, PPARD	133	45	19453	19.5018	0.030825	0.000423107	0.000378318
GOTERM_BP_DIRECT	GO:0060252~positive regulation of glial cell proliferation	5	3.7594	1.34765e-05	MYC, IL1B, E2F1, VEGFC, TNF	133	22	19453	33.2416	0.0316958	0.00042945	0.000383989
GOTERM_BP_DIRECT	GO:0043406~positive regulation of MAP kinase activity	7	5.26316	1.39142e-05	TGFB1, EGF, IL1B, ERBB2, TNF, ADRA2A, PIK3CG	133	77	19453	13.2967	0.0327082	0.000437564	0.000391245
GOTERM_BP_DIRECT	GO:0051726~regulation of cell cycle	11	8.27068	1.48711e-05	JUN, RBL1, CDKN2A, PTEN, MDM2, BAX, XIAP, E2F2, BAK1, PRKACA, TP53	133	268	19453	6.00334	0.0349181	0.000459322	0.000410699
GOTERM_BP_DIRECT	GO:0071260~cellular response to mechanical stimulus	7	5.26316	1.49904e-05	TGFB1, CASP8, IL1B, CHEK1, BAK1, PTGS2, NFKB1	133	78	19453	13.1262	0.0351932	0.000459322	0.000410699
GOTERM_BP_DIRECT	GO:0006805~xenobiotic metabolic process	8	6.01504	1.5927e-05	POR, CYP2B6, GSTP1, CYP1A2, GSTA1, CYP1A1, CYP1B1, CYP3A4	133	118	19453	9.91615	0.0373504	0.000480068	0.000429249
GOTERM_BP_DIRECT	GO:0006809~nitric oxide biosynthetic process	5	3.7594	1.6228e-05	NOS2, NOS3, CAV1, CYP1B1, AKT1	133	23	19453	31.7963	0.0380427	0.000480068	0.000429249
GOTERM_BP_DIRECT	GO:0045429~positive regulation of nitric oxide biosynthetic process	6	4.51128	1.62701e-05	IFNG, IL1B, AKT1, SOD2, PTGS2, TNF	133	47	19453	18.6719	0.0381394	0.000480068	0.000429249
GOTERM_BP_DIRECT	GO:0043536~positive regulation of blood vessel endothelial cell migration	6	4.51128	2.00073e-05	TGFB1, NOS3, VEGFC, HSPB1, AKT1, NFE2L2	133	49	19453	17.9098	0.0466928	0.000583141	0.000521411
GOTERM_BP_DIRECT	GO:0007165~signal transduction	24	18.0451	2.21126e-05	IL10, CHRM3, GSK3B, PRKCB, GABRA3, VEGFC, MAPK14, ESR2, NR3C2, C3, AR, CCND3, GJA1, ERBB3, RASSF3, PLAU, IL1B, ERBB2, CDK2, SPP1, AKT1, PPARG, IGFBP6, RAF1	133	1307	19453	2.68578	0.0514774	0.000636736	0.000569332
GOTERM_BP_DIRECT	GO:0043410~positive regulation of MAPK cascade	9	6.76692	2.30388e-05	AR, EGF, HGF, ERBB2, IGF2, IGFBP6, RAF1, TNF, ADRA2A	133	172	19453	7.6533	0.0535749	0.000651253	0.000582313
GOTERM_BP_DIRECT	GO:0006979~response to oxidative stress	8	6.01504	2.31617e-05	PRDX4, HMOX1, AKT1, PTGS2, MPO, TP53, NFE2L2, PTGS1	133	125	19453	9.36084	0.0538528	0.000651253	0.000582313
GOTERM_BP_DIRECT	GO:0030308~negative regulation of cell growth	8	6.01504	2.43871e-05	GJA1, TGFB1, CDKN2A, BCL2, PPARG, TP53, ESR2, PPARD	133	126	19453	9.28655	0.0566198	0.000677735	0.000605991
GOTERM_BP_DIRECT	GO:0010888~negative regulation of lipid storage	4	3.00752	2.48995e-05	NFKBIA, CRP, PPARG, TNF	133	9	19453	65.0058	0.0577744	0.00068402	0.000611612
GOTERM_BP_DIRECT	GO:0097191~extrinsic apoptotic signaling pathway	6	4.51128	2.68283e-05	GSK3B, TGFB1, CASP8, IFNG, BAX, TNF	133	52	19453	16.8765	0.062108	0.000728632	0.0006515
GOTERM_BP_DIRECT	GO:0035902~response to immobilization stress	5	3.7594	3.14932e-05	TGFB1, CYP1A1, PPARG, FOS, SOD2	133	27	19453	27.0858	0.072507	0.00082713	0.000739572
GOTERM_BP_DIRECT	GO:0010875~positive regulation of cholesterol efflux	5	3.7594	3.14932e-05	NFKBIA, RXRA, CAV1, PON1, PPARG	133	27	19453	27.0858	0.072507	0.00082713	0.000739572
GOTERM_BP_DIRECT	GO:1902894~negative regulation of pri-miRNA transcription from RNA polymerase II promoter	5	3.7594	3.14932e-05	TGFB1, PPARG, PPARA, RELA, PPARD	133	27	19453	27.0858	0.072507	0.00082713	0.000739572
GOTERM_BP_DIRECT	GO:0042572~retinol metabolic process	6	4.51128	3.53304e-05	ADH1C, CYP1A2, AKR1C3, CYP1A1, CYP1B1, CYP3A4	133	55	19453	15.956	0.0809742	0.000917822	0.000820664
GOTERM_BP_DIRECT	GO:0006974~cellular response to DNA damage stimulus	11	8.27068	3.68377e-05	TOP2A, CASP9, PARP1, CHEK2, MYC, CASP3, CHEK1, BCL2, XIAP, TP53, MCL1	133	298	19453	5.39898	0.0842792	0.00094669	0.000846475
GOTERM_BP_DIRECT	GO:0048146~positive regulation of fibroblast proliferation	6	4.51128	3.85843e-05	CCNA2, CCNB1, JUN, TGFB1, MYC, E2F1	133	56	19453	15.6711	0.0880939	0.000981026	0.000877177
GOTERM_BP_DIRECT	GO:0033138~positive regulation of peptidyl-serine phosphorylation	7	5.26316	4.09421e-05	TGFB1, CAV1, BCL2, AKT1, RAF1, PTGS2, TNF	133	93	19453	11.0091	0.0932183	0.00103002	0.000920981
GOTERM_BP_DIRECT	GO:0033137~negative regulation of peptidyl-serine phosphorylation	5	3.7594	4.21751e-05	CAV1, HGF, PTEN, BAX, BAK1	133	29	19453	25.2178	0.0958868	0.00104998	0.000938836
GOTERM_BP_DIRECT	GO:0042981~regulation of apoptotic process	10	7.5188	4.55098e-05	CASP9, CASP8, RASSF3, BAX, XIAP, AKT1, RAF1, TP53, NAIP, MCL1	133	245	19453	5.96992	0.103064	0.00111659	0.000998393
GOTERM_BP_DIRECT	GO:0048661~positive regulation of smooth muscle cell proliferation	6	4.51128	4.5785e-05	TGFB1, MYC, HMOX1, AKT1, PTGS2, TNF	133	58	19453	15.1307	0.103654	0.00111659	0.000998393
GOTERM_BP_DIRECT	GO:0045840~positive regulation of mitotic nuclear division	5	3.7594	4.84085e-05	IL1A, EGF, IL1B, IGF2, TNF	133	30	19453	24.3772	0.109257	0.00112365	0.00100471
GOTERM_BP_DIRECT	GO:0071394~cellular response to testosterone stimulus	4	3.00752	4.84253e-05	AR, MYC, SPP1, ELK1	133	11	19453	53.1866	0.109292	0.00112365	0.00100471
GOTERM_BP_DIRECT	GO:0071492~cellular response to UV-A	4	3.00752	4.84253e-05	MMP1, MMP2, MMP3, MMP9	133	11	19453	53.1866	0.109292	0.00112365	0.00100471
GOTERM_BP_DIRECT	GO:0050665~hydrogen peroxide biosynthetic process	4	3.00752	4.84253e-05	MAOB, CYP1A2, CYP1A1, SOD2	133	11	19453	53.1866	0.109292	0.00112365	0.00100471
GOTERM_BP_DIRECT	GO:0070242~thymocyte apoptotic process	4	3.00752	4.84253e-05	CHEK2, BAX, BAK1, TP53	133	11	19453	53.1866	0.109292	0.00112365	0.00100471
GOTERM_BP_DIRECT	GO:0045892~negative regulation of transcription, DNA-templated	15	11.2782	4.9786e-05	CDKN1C, JUN, TGFB1, PARP1, CDKN2A, TNF, RELA, IL4, IFNG, MDM2, E2F1, PPARG, TP53, PPARD, RUNX1T1	133	591	19453	3.71226	0.112185	0.00114412	0.00102301
GOTERM_BP_DIRECT	GO:0042060~wound healing	7	5.26316	5.49967e-05	TGFB1, ERBB3, CASP3, ERBB2, RAF1, PPARA, PPARD	133	98	19453	10.4474	0.123173	0.00125183	0.00111931
GOTERM_BP_DIRECT	GO:0043525~positive regulation of neuron apoptotic process	6	4.51128	6.32718e-05	CASP9, CASP8, CASP3, BAX, TNF, TP53	133	62	19453	14.1545	0.140345	0.0014266	0.00127558
GOTERM_BP_DIRECT	GO:0043388~positive regulation of DNA binding	5	3.7594	7.11515e-05	EGF, MYC, PPARG, CALM2, MMP9	133	33	19453	22.1611	0.156384	0.00156102	0.00139577
GOTERM_BP_DIRECT	GO:0048662~negative regulation of smooth muscle cell proliferation	5	3.7594	7.11515e-05	IFNG, NOS3, HMOX1, PPARG, PPARD	133	33	19453	22.1611	0.156384	0.00156102	0.00139577
GOTERM_BP_DIRECT	GO:0050728~negative regulation of inflammatory response	8	6.01504	7.11929e-05	IL10, IL4, HGF, PPARG, PPARA, NFKB1, IL2, PPARD	133	149	19453	7.85306	0.156468	0.00156102	0.00139577
GOTERM_BP_DIRECT	GO:0032757~positive regulation of interleukin-8 production	6	4.51128	7.94607e-05	NOS2, IL1B, SERPINE1, TNF, F3, RELA	133	65	19453	13.5012	0.172974	0.0017262	0.00154347
GOTERM_BP_DIRECT	GO:0035924~cellular response to vascular endothelial growth factor stimulus	5	3.7594	8.0216e-05	VCAM1, HSPB1, AKT1, MAPK14, RELA	133	34	19453	21.5093	0.174465	0.0017262	0.00154347
GOTERM_BP_DIRECT	GO:0032755~positive regulation of interleukin-6 production	7	5.26316	8.0893e-05	IL1A, TGFB1, IFNG, NOS2, IL1B, TNF, RELA	133	105	19453	9.75088	0.1758	0.0017262	0.00154347
GOTERM_BP_DIRECT	GO:0032731~positive regulation of interleukin-1 beta production	6	4.51128	9.1906e-05	CASP8, IFNG, HSPB1, TNF, RELA, NAIP	133	67	19453	13.0982	0.197213	0.00194385	0.00173808
GOTERM_BP_DIRECT	GO:0000165~MAPK cascade	8	6.01504	9.89014e-05	AR, TGFB1, MYC, IL1B, CAV1, RAF1, TNF, MAP3K7	133	157	19453	7.4529	0.210524	0.00207346	0.00185397
GOTERM_BP_DIRECT	GO:0032570~response to progesterone	5	3.7594	0.000100823	CLDN4, TGFB1, CAV1, FOS, RELA	133	36	19453	20.3143	0.214142	0.00209537	0.00187356
GOTERM_BP_DIRECT	GO:0071498~cellular response to fluid shear stress	4	3.00752	0.000105247	MMP2, HAS2, PTGS2, NFE2L2	133	14	19453	41.7895	0.222408	0.00214286	0.00191602
GOTERM_BP_DIRECT	GO:0010745~negative regulation of macrophage derived foam cell differentiation	4	3.00752	0.000105247	NFKBIA, CRP, PPARG, PPARA	133	14	19453	41.7895	0.222408	0.00214286	0.00191602
GOTERM_BP_DIRECT	GO:0070301~cellular response to hydrogen peroxide	6	4.51128	0.000105798	PCNA, MDM2, CDK1, CYP1B1, RELA, NFE2L2	133	69	19453	12.7185	0.223431	0.00214286	0.00191602
GOTERM_BP_DIRECT	GO:0097193~intrinsic apoptotic signaling pathway	5	3.7594	0.000112452	CASP9, CASP3, BAX, BAK1, TP53	133	37	19453	19.7653	0.235686	0.0022585	0.00201942
GOTERM_BP_DIRECT	GO:0043524~negative regulation of neuron apoptotic process	8	6.01504	0.000124979	IL10, JUN, ERBB3, BCL2, BAX, HMOX1, SOD2, NAIP	133	163	19453	7.17856	0.258232	0.00246949	0.00220807
GOTERM_BP_DIRECT	GO:0014065~phosphatidylinositol 3-kinase signaling	5	3.7594	0.000125024	ERBB3, ERBB2, PTEN, AKT1, PIK3CG	133	38	19453	19.2452	0.258312	0.00246949	0.00220807
GOTERM_BP_DIRECT	GO:0018107~peptidyl-threonine phosphorylation	6	4.51128	0.000129592	GSK3B, CHEK1, BCL2, CDK1, AKT1, PRKACA	133	72	19453	12.1886	0.266367	0.00252258	0.00225554
GOTERM_BP_DIRECT	GO:0051092~positive regulation of NF-kappaB transcription factor activity	8	6.01504	0.000129823	AR, TGFB1, PRKCB, IL1B, CAV1, TNF, MAP3K7, RELA	133	164	19453	7.13479	0.266771	0.00252258	0.00225554
GOTERM_BP_DIRECT	GO:0080135~regulation of cellular response to stress	4	3.00752	0.000130906	BCL2, BAX, BAK1, MCL1	133	15	19453	39.0035	0.268667	0.00252312	0.00225602
GOTERM_BP_DIRECT	GO:0060559~positive regulation of calcidiol 1-monooxygenase activity	3	2.25564	0.000136482	IFNG, IL1B, TNF	133	3	19453	146.263	0.27835	0.00260954	0.0023333
GOTERM_BP_DIRECT	GO:0097190~apoptotic signaling pathway	6	4.51128	0.00013837	CASP8, CASP3, CAV1, BAX, BAK1, PPARD	133	73	19453	12.0216	0.281599	0.00262464	0.0023468
GOTERM_BP_DIRECT	GO:1900182~positive regulation of protein localization to nucleus	5	3.7594	0.000153177	TGFB1, PARP1, CDKN2A, CDK1, AKT1	133	40	19453	18.2829	0.30658	0.00283408	0.00253407
GOTERM_BP_DIRECT	GO:0031100~animal organ regeneration	5	3.7594	0.000153177	CCNA2, HGF, CDK1, PPARG, BAK1	133	40	19453	18.2829	0.30658	0.00283408	0.00253407
GOTERM_BP_DIRECT	GO:0008625~extrinsic apoptotic signaling pathway via death domain receptors	5	3.7594	0.000153177	CASP8, BCL2, BAX, RAF1, TNF	133	40	19453	18.2829	0.30658	0.00283408	0.00253407
GOTERM_BP_DIRECT	GO:0051091~positive regulation of sequence-specific DNA binding transcription factor activity	7	5.26316	0.000154155	IL10, IL1B, PTEN, AKT1, PPARG, TNF, ESR2	133	118	19453	8.67663	0.3082	0.00283408	0.00253407
GOTERM_BP_DIRECT	GO:0030163~protein catabolic process	6	4.51128	0.000157285	CASP7, CHEK2, CASP3, MMP2, AKT1, RELA	133	75	19453	11.7011	0.313357	0.00286955	0.00256579
GOTERM_BP_DIRECT	GO:0098869~cellular oxidant detoxification	6	4.51128	0.000167453	GSTM2, PRDX4, GSTP1, GSTA1, PTGS2, PTGS1	133	76	19453	11.5471	0.329845	0.00303191	0.00271096
GOTERM_BP_DIRECT	GO:0035094~response to nicotine	5	3.7594	0.000168848	VCAM1, CASP3, MMP2, BCL2, HMOX1	133	41	19453	17.837	0.332077	0.00303419	0.002713
GOTERM_BP_DIRECT	GO:0001938~positive regulation of endothelial cell proliferation	6	4.51128	0.000189288	IL10, JUN, EGF, VEGFC, AKT1, F3	133	78	19453	11.251	0.363927	0.00337611	0.00301873
GOTERM_BP_DIRECT	GO:0042770~signal transduction in response to DNA damage	4	3.00752	0.000193706	CASP9, CHEK2, CHEK1, MAPK14	133	17	19453	34.4149	0.370609	0.00342931	0.00306629
GOTERM_BP_DIRECT	GO:0042307~positive regulation of protein import into nucleus	5	3.7594	0.000203616	TGFB1, IFNG, CDK1, MAPK14, PTGS2	133	43	19453	17.0073	0.385344	0.00357826	0.00319947
GOTERM_BP_DIRECT	GO:0008637~apoptotic mitochondrial changes	4	3.00752	0.000231296	CDKN2A, BAX, AKT1, HK2	133	18	19453	32.5029	0.424698	0.00400577	0.00358173
GOTERM_BP_DIRECT	GO:0051044~positive regulation of membrane protein ectodomain proteolysis	4	3.00752	0.000231296	IFNG, IL1B, TNF, ADRA2A	133	18	19453	32.5029	0.424698	0.00400577	0.00358173
GOTERM_BP_DIRECT	GO:0008217~regulation of blood pressure	6	4.51128	0.000253387	NOS3, HMOX1, PPARG, SOD2, PTGS2, PTGS1	133	83	19453	10.5732	0.454292	0.00435679	0.00389559
GOTERM_BP_DIRECT	GO:1904646~cellular response to beta-amyloid	5	3.7594	0.000265043	GSK3B, GJA1, VCAM1, PARP1, TNF	133	46	19453	15.8982	0.469288	0.00446093	0.0039887
GOTERM_BP_DIRECT	GO:0042311~vasodilation	5	3.7594	0.000265043	NOS3, KCNMA1, TNF, ADRA2A, PPARD	133	46	19453	15.8982	0.469288	0.00446093	0.0039887
GOTERM_BP_DIRECT	GO:1904706~negative regulation of vascular smooth muscle cell proliferation	5	3.7594	0.000265043	IL10, PTEN, HMOX1, PPARG, SOD2	133	46	19453	15.8982	0.469288	0.00446093	0.0039887
GOTERM_BP_DIRECT	GO:1900127~positive regulation of hyaluronan biosynthetic process	3	2.25564	0.000271749	EGF, HAS2, NFKB1	133	4	19453	109.697	0.477729	0.00453608	0.0040559
GOTERM_BP_DIRECT	GO:0033280~response to vitamin D	4	3.00752	0.000273303	TGFB1, PRKCB, SPP1, PTGS2	133	19	19453	30.7922	0.479666	0.00453608	0.0040559
GOTERM_BP_DIRECT	GO:0008203~cholesterol metabolic process	6	4.51128	0.000299045	IL4, RXRA, PON1, CYP1A2, CYP3A4, PPARD	133	86	19453	10.2044	0.510722	0.00492909	0.00440731
GOTERM_BP_DIRECT	GO:0035556~intracellular signal transduction	12	9.02256	0.000315966	GSK3B, RASSF3, PRKCB, ERBB2, CHEK1, HSPB1, HMOX1, AKT1, ADCY2, RAF1, MAPK14, RELA	133	462	19453	3.79904	0.53012	0.00517232	0.00462479
GOTERM_BP_DIRECT	GO:1902176~negative regulation of oxidative stress-induced intrinsic apoptotic signaling pathway	4	3.00752	0.000319942	HSPB1, AKT1, SOD2, NFE2L2	133	20	19453	29.2526	0.534565	0.00520177	0.00465112
GOTERM_BP_DIRECT	GO:0034097~response to cytokine	5	3.7594	0.000338761	BCL2, FOS, RELA, NFKB1, MCL1	133	49	19453	14.9248	0.555043	0.00543382	0.00485861
GOTERM_BP_DIRECT	GO:0051781~positive regulation of cell division	5	3.7594	0.000338761	IL1A, TGFB1, IL1B, IGF2, VEGFC	133	49	19453	14.9248	0.555043	0.00543382	0.00485861
GOTERM_BP_DIRECT	GO:0046827~positive regulation of protein export from nucleus	4	3.00752	0.000371418	GSK3B, IL1B, MDM2, PRKACA	133	21	19453	27.8596	0.588462	0.00591792	0.00529147
GOTERM_BP_DIRECT	GO:1902004~positive regulation of beta-amyloid formation	4	3.00752	0.000427935	IFNG, CASP3, TNF, RELA	133	22	19453	26.5933	0.640479	0.00664133	0.00593829
GOTERM_BP_DIRECT	GO:0071391~cellular response to estrogen stimulus	4	3.00752	0.000427935	AR, MYC, MDM2, ESR2	133	22	19453	26.5933	0.640479	0.00664133	0.00593829
GOTERM_BP_DIRECT	GO:0097194~execution phase of apoptosis	4	3.00752	0.000427935	CASP7, CASP8, CASP3, AKT1	133	22	19453	26.5933	0.640479	0.00664133	0.00593829
GOTERM_BP_DIRECT	GO:0019373~epoxygenase P450 pathway	4	3.00752	0.000427935	CYP2B6, CYP1A2, CYP1A1, CYP1B1	133	22	19453	26.5933	0.640479	0.00664133	0.00593829
GOTERM_BP_DIRECT	GO:0045923~positive regulation of fatty acid metabolic process	3	2.25564	0.000450899	PPARG, PPARA, PPARD	133	5	19453	87.7579	0.659688	0.00687171	0.00614429
GOTERM_BP_DIRECT	GO:0071677~positive regulation of mononuclear cell migration	3	2.25564	0.000450899	IL4, TGFB1, TNF	133	5	19453	87.7579	0.659688	0.00687171	0.00614429
GOTERM_BP_DIRECT	GO:0007265~Ras protein signal transduction	6	4.51128	0.000451405	CCNA2, JUN, CDKN2A, CDK2, TP53, ADRA2A	133	94	19453	9.33595	0.6601	0.00687171	0.00614429
GOTERM_BP_DIRECT	GO:0042178~xenobiotic catabolic process	4	3.00752	0.000489691	GSTM2, CYP2B6, CYP1A2, CYP3A4	133	23	19453	25.4371	0.689834	0.00736076	0.00658157
GOTERM_BP_DIRECT	GO:0014911~positive regulation of smooth muscle cell migration	4	3.00752	0.000489691	MYC, BCL2, CYP1B1, HAS2	133	23	19453	25.4371	0.689834	0.00736076	0.00658157
GOTERM_BP_DIRECT	GO:2000378~negative regulation of reactive oxygen species metabolic process	4	3.00752	0.000556879	MMP3, BCL2, TP53, HK2	133	24	19453	24.3772	0.73587	0.00831839	0.00743782
GOTERM_BP_DIRECT	GO:0008202~steroid metabolic process	5	3.7594	0.000566129	CYP2B6, AKR1C3, CYP1A1, CYP1B1, CYP3A4	133	56	19453	13.0592	0.741648	0.00835215	0.00746801
GOTERM_BP_DIRECT	GO:2000300~regulation of synaptic vesicle exocytosis	5	3.7594	0.000566129	CHRM2, GSK3B, PRKCB, CALM2, ADRA2A	133	56	19453	13.0592	0.741648	0.00835215	0.00746801
GOTERM_BP_DIRECT	GO:0032025~response to cobalt ion	3	2.25564	0.00067334	CASP9, CASP8, CASP3	133	6	19453	73.1316	0.800077	0.00987289	0.00882777
GOTERM_BP_DIRECT	GO:0007179~transforming growth factor beta receptor signaling pathway	6	4.51128	0.000685792	JUN, TGFB1, PARP1, FOS, MAP3K7, TP53	133	103	19453	8.52018	0.805943	0.00999416	0.0089362
GOTERM_BP_DIRECT	GO:0001782~B cell homeostasis	4	3.00752	0.000708305	CASP3, BCL2, BAX, BAK1	133	26	19453	22.502	0.816116	0.0101979	0.00911836
GOTERM_BP_DIRECT	GO:0046697~decidualization	4	3.00752	0.000708305	PARP1, SPP1, PTGS2, PPARD	133	26	19453	22.502	0.816116	0.0101979	0.00911836
GOTERM_BP_DIRECT	GO:0051384~response to glucocorticoid	5	3.7594	0.000736075	IL10, CASP3, BCL2, PTGS2, TNF	133	60	19453	12.1886	0.827932	0.0105342	0.00941911
GOTERM_BP_DIRECT	GO:0045599~negative regulation of fat cell differentiation	5	3.7594	0.000783625	TGFB1, E2F1, SOD2, TNF, RUNX1T1	133	61	19453	11.9888	0.84643	0.0110821	0.00990901
GOTERM_BP_DIRECT	GO:0019221~cytokine-mediated signaling pathway	7	5.26316	0.000786681	IL1A, IL1B, CAV1, AKT1, PRKACA, F3, RELA	133	160	19453	6.39901	0.847548	0.0110821	0.00990901
GOTERM_BP_DIRECT	GO:0090200~positive regulation of release of cytochrome c from mitochondria	4	3.00752	0.000792906	BAX, BAK1, TP53, MMP9	133	27	19453	21.6686	0.849802	0.0110821	0.00990901
GOTERM_BP_DIRECT	GO:0072332~intrinsic apoptotic signaling pathway by p53 class mediator	4	3.00752	0.000792906	E2F1, BAX, E2F2, TP53	133	27	19453	21.6686	0.849802	0.0110821	0.00990901
GOTERM_BP_DIRECT	GO:0007584~response to nutrient	5	3.7594	0.000833305	POR, VCAM1, AKR1C3, CYP1B1, PPARG	133	62	19453	11.7954	0.863636	0.0115791	0.0103533
GOTERM_BP_DIRECT	GO:2001243~negative regulation of intrinsic apoptotic signaling pathway	4	3.00752	0.000883669	BCL2, AKT1, MMP9, MCL1	133	28	19453	20.8947	0.879113	0.0121583	0.0108713
GOTERM_BP_DIRECT	GO:0010507~negative regulation of autophagy	5	3.7594	0.000885166	IL10, HGF, BCL2, AKT1, MCL1	133	63	19453	11.6082	0.879545	0.0121583	0.0108713
GOTERM_BP_DIRECT	GO:0006468~protein phosphorylation	11	8.27068	0.000908999	GSK3B, TGFB1, PRKCB, CHEK2, ERBB2, CHEK1, CDK2, CDK1, AKT1, RAF1, PRKACA	133	444	19453	3.62364	0.886221	0.0124143	0.0111002
GOTERM_BP_DIRECT	GO:0009615~response to virus	6	4.51128	0.000923312	CHRM2, IFNG, ODC1, CYP1A1, HSPB1, TNF	133	110	19453	7.97799	0.890051	0.0125382	0.0112109
GOTERM_BP_DIRECT	GO:0046321~positive regulation of fatty acid oxidation	3	2.25564	0.000938484	PPARG, PPARA, PPARD	133	7	19453	62.6842	0.89397	0.012601	0.0112671
GOTERM_BP_DIRECT	GO:0008635~activation of cysteine-type endopeptidase activity involved in apoptotic process by cytochrome c	3	2.25564	0.000938484	CASP9, BAX, BAK1	133	7	19453	62.6842	0.89397	0.012601	0.0112671
GOTERM_BP_DIRECT	GO:0043085~positive regulation of catalytic activity	4	3.00752	0.000980765	CAV1, BCL2, IGF2, FGFR4	133	29	19453	20.1742	0.90417	0.0130951	0.0117089
GOTERM_BP_DIRECT	GO:0008584~male gonad development	6	4.51128	0.0010012	AR, GJA1, PRDX4, BCL2, AKR1C3, CYP1B1	133	112	19453	7.83553	0.908743	0.0132938	0.0118865
GOTERM_BP_DIRECT	GO:0014070~response to organic cyclic compound	5	3.7594	0.00105436	CYP1A1, CDK1, BAK1, PPARA, ACACB	133	66	19453	11.0805	0.919641	0.01377	0.0123124
GOTERM_BP_DIRECT	GO:0050680~negative regulation of epithelial cell proliferation	5	3.7594	0.00105436	CDKN1C, AR, TGFB1, PTEN, PPARD	133	66	19453	11.0805	0.919641	0.01377	0.0123124
GOTERM_BP_DIRECT	GO:0042752~regulation of circadian rhythm	5	3.7594	0.00105436	TOP2A, GSK3B, CDK1, PPARG, PPARA	133	66	19453	11.0805	0.919641	0.01377	0.0123124
GOTERM_BP_DIRECT	GO:0001774~microglial cell activation	4	3.00752	0.00108436	IL4, JUN, IFNG, TNF	133	30	19453	19.5018	0.925207	0.0140088	0.0125258
GOTERM_BP_DIRECT	GO:0071480~cellular response to gamma radiation	4	3.00752	0.00108436	CHEK2, MDM2, ELK1, TP53	133	30	19453	19.5018	0.925207	0.0140088	0.0125258
GOTERM_BP_DIRECT	GO:0048009~insulin-like growth factor receptor signaling pathway	4	3.00752	0.00119462	AR, IGF2, AKT1, RAF1	133	31	19453	18.8727	0.94255	0.0152681	0.0136519
GOTERM_BP_DIRECT	GO:0045776~negative regulation of blood pressure	4	3.00752	0.00119462	NOS2, NOS3, VEGFC, PPARA	133	31	19453	18.8727	0.94255	0.0152681	0.0136519
GOTERM_BP_DIRECT	GO:2000272~negative regulation of receptor activity	3	2.25564	0.00124575	PPARG, PPARA, TNF	133	8	19453	54.8487	0.949167	0.015507	0.0138655
GOTERM_BP_DIRECT	GO:1901687~glutathione derivative biosynthetic process	3	2.25564	0.00124575	GSTM2, GSTP1, GSTA1	133	8	19453	54.8487	0.949167	0.015507	0.0138655
GOTERM_BP_DIRECT	GO:0071316~cellular response to nicotine	3	2.25564	0.00124575	TNF, RELA, NFKB1	133	8	19453	54.8487	0.949167	0.015507	0.0138655
GOTERM_BP_DIRECT	GO:0002674~negative regulation of acute inflammatory response	3	2.25564	0.00124575	IL4, GSTP1, PPARG	133	8	19453	54.8487	0.949167	0.015507	0.0138655
GOTERM_BP_DIRECT	GO:0007207~phospholipase C-activating G-protein coupled acetylcholine receptor signaling pathway	3	2.25564	0.00124575	CHRM2, CHRM3, PRKCB	133	8	19453	54.8487	0.949167	0.015507	0.0138655
GOTERM_BP_DIRECT	GO:0043392~negative regulation of DNA binding	4	3.00752	0.0013117	NFKBIA, JUN, E2F1, HMOX1	133	32	19453	18.2829	0.956588	0.0161596	0.0144489
GOTERM_BP_DIRECT	GO:0030225~macrophage differentiation	4	3.00752	0.0013117	CASP8, IFNG, PARP1, MMP9	133	32	19453	18.2829	0.956588	0.0161596	0.0144489
GOTERM_BP_DIRECT	GO:0008283~cell proliferation	7	5.26316	0.00136417	MYC, ODC1, CYP1A1, CDK1, AKT1, BAK1, PPARD	133	178	19453	5.75192	0.961711	0.0167198	0.0149499
GOTERM_BP_DIRECT	GO:0007623~circadian rhythm	5	3.7594	0.00138484	GSK3B, CLDN4, NOS2, TOP1, TNF	133	71	19453	10.3002	0.963559	0.0168866	0.015099
GOTERM_BP_DIRECT	GO:0008210~estrogen metabolic process	4	3.00752	0.00143575	CYP1A2, CYP1A1, CYP1B1, CYP3A4	133	33	19453	17.7289	0.967739	0.0173305	0.015496
GOTERM_BP_DIRECT	GO:0051881~regulation of mitochondrial membrane potential	4	3.00752	0.00143575	BCL2, BAX, BAK1, SOD2	133	33	19453	17.7289	0.967739	0.0173305	0.015496
GOTERM_BP_DIRECT	GO:0006260~DNA replication	6	4.51128	0.00146597	PCNA, CHEK1, CDK2, CDK1, TOP1, ADRA2A	133	122	19453	7.19327	0.96999	0.0176063	0.0157426
GOTERM_BP_DIRECT	GO:0019371~cyclooxygenase pathway	3	2.25564	0.00159457	AKR1C3, PTGS2, PTGS1	133	9	19453	48.7544	0.977941	0.0190551	0.0170379
GOTERM_BP_DIRECT	GO:0032091~negative regulation of protein binding	5	3.7594	0.00169661	GSK3B, CAV1, BAX, AKT1, PPARA	133	75	19453	9.75088	0.982722	0.0201736	0.0180381
GOTERM_BP_DIRECT	GO:0032868~response to insulin	5	3.7594	0.00178156	IL10, FOS, MAPK14, PPARA, RELA	133	76	19453	9.62258	0.985902	0.0210789	0.0188475
GOTERM_BP_DIRECT	GO:0043542~endothelial cell migration	4	3.00752	0.00185125	DPP4, NOS3, PTEN, CYP1B1	133	36	19453	16.2515	0.988069	0.0216887	0.0193928
GOTERM_BP_DIRECT	GO:0070059~intrinsic apoptotic signaling pathway in response to endoplasmic reticulum stress	4	3.00752	0.00185125	BCL2, BAX, BAK1, TP53	133	36	19453	16.2515	0.988069	0.0216887	0.0193928
GOTERM_BP_DIRECT	GO:0030198~extracellular matrix organization	7	5.26316	0.00189952	PRDX4, MMP1, MMP2, MMP3, TNF, MMP9, COL19A1	133	190	19453	5.38864	0.989371	0.0221456	0.0198014
GOTERM_BP_DIRECT	GO:0001783~B cell apoptotic process	3	2.25564	0.00198436	BCL2, BAX, BAK1	133	10	19453	43.8789	0.991325	0.022707	0.0203033
GOTERM_BP_DIRECT	GO:0070431~nucleotide-binding oligomerization domain containing 2 signaling pathway	3	2.25564	0.00198436	NFKBIA, XIAP, RELA	133	10	19453	43.8789	0.991325	0.022707	0.0203033
GOTERM_BP_DIRECT	GO:2001237~negative regulation of extrinsic apoptotic signaling pathway	4	3.00752	0.00200468	IL4, AR, GSTP1, RELA	133	37	19453	15.8122	0.991737	0.022707	0.0203033
GOTERM_BP_DIRECT	GO:2000352~negative regulation of endothelial cell apoptotic process	4	3.00752	0.00200468	IL10, IL4, SERPINE1, NFE2L2	133	37	19453	15.8122	0.991737	0.022707	0.0203033
GOTERM_BP_DIRECT	GO:0000077~DNA damage checkpoint	4	3.00752	0.00200468	CHEK2, CHEK1, E2F1, MAPK14	133	37	19453	15.8122	0.991737	0.022707	0.0203033
GOTERM_BP_DIRECT	GO:0045765~regulation of angiogenesis	4	3.00752	0.00200468	ERBB2, HMOX1, CXCL13, PIK3CG	133	37	19453	15.8122	0.991737	0.022707	0.0203033
GOTERM_BP_DIRECT	GO:0042742~defense response to bacterium	8	6.01504	0.002052	IL10, CASP7, NOS2, XIAP, CXCL13, MPO, MAP3K7, NAIP	133	261	19453	4.48316	0.992622	0.023048	0.0206082
GOTERM_BP_DIRECT	GO:0014068~positive regulation of phosphatidylinositol 3-kinase signaling	5	3.7594	0.00205406	ERBB3, EGF, HGF, TNF, PPARD	133	79	19453	9.25716	0.992659	0.023048	0.0206082
GOTERM_BP_DIRECT	GO:0045787~positive regulation of cell cycle	4	3.00752	0.00216579	IL10, MYC, CHEK1, MAP3K7	133	38	19453	15.3961	0.994382	0.024188	0.0216275
GOTERM_BP_DIRECT	GO:0048511~rhythmic process	5	3.7594	0.00225095	TOP2A, GSK3B, CDK1, PPARG, TP53	133	81	19453	9.02859	0.995419	0.0250222	0.0223734
GOTERM_BP_DIRECT	GO:1903799~negative regulation of production of miRNAs involved in gene silencing by miRNA	3	2.25564	0.00241457	TGFB1, TNF, TP53	133	11	19453	39.89	0.996904	0.0264716	0.0236694
GOTERM_BP_DIRECT	GO:0010887~negative regulation of cholesterol storage	3	2.25564	0.00241457	PPARG, PPARA, PPARD	133	11	19453	39.89	0.996904	0.0264716	0.0236694
GOTERM_BP_DIRECT	GO:0009651~response to salt stress	3	2.25564	0.00241457	BAX, TNF, TP53	133	11	19453	39.89	0.996904	0.0264716	0.0236694
GOTERM_BP_DIRECT	GO:0071347~cellular response to interleukin-1	5	3.7594	0.00246047	MYC, MMP2, HAS2, RELA, NFKB1	133	83	19453	8.81103	0.997227	0.0267296	0.0239001
GOTERM_BP_DIRECT	GO:0001889~liver development	5	3.7594	0.00246047	JUN, HGF, SOD2, ELK1, RELA	133	83	19453	8.81103	0.997227	0.0267296	0.0239001
GOTERM_BP_DIRECT	GO:0001974~blood vessel remodeling	4	3.00752	0.00251161	NOS3, MDM2, BAX, BAK1	133	40	19453	14.6263	0.997547	0.0269181	0.0240686
GOTERM_BP_DIRECT	GO:0071392~cellular response to estradiol stimulus	4	3.00752	0.00251161	IL10, CCNA2, MMP2, ESR2	133	40	19453	14.6263	0.997547	0.0269181	0.0240686
GOTERM_BP_DIRECT	GO:0051604~protein maturation	4	3.00752	0.00251161	CASP9, CASP7, CASP8, CASP3	133	40	19453	14.6263	0.997547	0.0269181	0.0240686
GOTERM_BP_DIRECT	GO:0006955~immune response	11	8.27068	0.00253101	IL10, IL4, C3, IL1A, IFNG, IL1B, CXCL13, TNF, MAP3K7, IL2, PIK3CG	133	510	19453	3.1547	0.997658	0.027005	0.0241463
GOTERM_BP_DIRECT	GO:0030574~collagen catabolic process	4	3.00752	0.00269656	MMP1, MMP2, MMP3, MMP9	133	41	19453	14.2696	0.998425	0.0285167	0.025498
GOTERM_BP_DIRECT	GO:0019216~regulation of lipid metabolic process	4	3.00752	0.00269656	PPARG, FGFR4, PPARA, PPARD	133	41	19453	14.2696	0.998425	0.0285167	0.025498
GOTERM_BP_DIRECT	GO:0007565~female pregnancy	5	3.7594	0.00279932	CLDN4, TGFB1, BCL2, FOS, ADRA2A	133	86	19453	8.50367	0.998769	0.029473	0.026353
GOTERM_BP_DIRECT	GO:0051926~negative regulation of calcium ion transport	3	2.25564	0.00288463	NOS3, PTGS2, ADRA2A	133	12	19453	36.5658	0.998996	0.029769	0.0266177
GOTERM_BP_DIRECT	GO:0065008~regulation of biological quality	3	2.25564	0.00288463	MDM2, ADCY2, TNF	133	12	19453	36.5658	0.998996	0.029769	0.0266177
GOTERM_BP_DIRECT	GO:0097267~omega-hydroxylase P450 pathway	3	2.25564	0.00288463	CYP1A2, CYP1A1, CYP1B1	133	12	19453	36.5658	0.998996	0.029769	0.0266177
GOTERM_BP_DIRECT	GO:0043276~anoikis	3	2.25564	0.00288463	E2F1, AKT1, MAP3K7	133	12	19453	36.5658	0.998996	0.029769	0.0266177
GOTERM_BP_DIRECT	GO:0001541~ovarian follicle development	4	3.00752	0.00288971	MYC, MMP2, BCL2, BAX	133	42	19453	13.9298	0.999009	0.029769	0.0266177
GOTERM_BP_DIRECT	GO:0016477~cell migration	8	6.01504	0.00291867	TGFB1, MMP2, PTEN, CDK1, IGFBP6, FGFR4, MMP9, PIK3CG	133	278	19453	4.20901	0.999075	0.0299383	0.0267691
GOTERM_BP_DIRECT	GO:0006357~regulation of transcription from RNA polymerase II promoter	23	17.2932	0.00309109	JUN, PRKCB, FOS, MAPK14, SOD2, ELK1, TNF, RELA, ESR2, NFKB1, NR3C2, AR, RBL1, RXRA, MYC, MDM2, E2F1, CDK1, E2F2, PPARG, TP53, NFE2L2, PPARD	133	1736	19453	1.93782	0.999388	0.0314378	0.0281099
GOTERM_BP_DIRECT	GO:0009409~response to cold	4	3.00752	0.00309117	CASP8, PPARG, FOS, SOD2	133	43	19453	13.6059	0.999388	0.0314378	0.0281099
GOTERM_BP_DIRECT	GO:0045454~cell redox homeostasis	4	3.00752	0.00330105	PRDX4, NOS2, NOS3, NFE2L2	133	44	19453	13.2967	0.99963	0.0334301	0.0298913
GOTERM_BP_DIRECT	GO:0033993~response to lipid	3	2.25564	0.003394	PPARG, PPARA, PPARD	133	13	19453	33.753	0.999704	0.03394	0.0303472
GOTERM_BP_DIRECT	GO:0032495~response to muramyl dipeptide	3	2.25564	0.003394	NFKBIA, MAPK14, RELA	133	13	19453	33.753	0.999704	0.03394	0.0303472
GOTERM_BP_DIRECT	GO:0030518~intracellular steroid hormone receptor signaling pathway	3	2.25564	0.003394	AR, ESR2, NR3C2	133	13	19453	33.753	0.999704	0.03394	0.0303472
GOTERM_BP_DIRECT	GO:0009755~hormone-mediated signaling pathway	4	3.00752	0.00351946	RXRA, PPARG, PPARA, PPARD	133	45	19453	13.0012	0.999781	0.0349025	0.0312078
GOTERM_BP_DIRECT	GO:0030316~osteoclast differentiation	4	3.00752	0.00351946	TGFB1, FOS, MAPK14, TNF	133	45	19453	13.0012	0.999781	0.0349025	0.0312078
GOTERM_BP_DIRECT	GO:0001701~in utero embryonic development	7	5.26316	0.00367318	AR, GJA1, CCNB1, NOS3, MYC, IGF2, TP53	133	217	19453	4.71817	0.999849	0.0362765	0.0324363
GOTERM_BP_DIRECT	GO:0050796~regulation of insulin secretion	4	3.00752	0.00374651	IFNG, NOS2, IL1B, TNF	133	46	19453	12.7185	0.999873	0.036399	0.0325459
GOTERM_BP_DIRECT	GO:0043407~negative regulation of MAP kinase activity	4	3.00752	0.00374651	IL1B, GSTP1, CAV1, PPARG	133	46	19453	12.7185	0.999873	0.036399	0.0325459
GOTERM_BP_DIRECT	GO:0022617~extracellular matrix disassembly	4	3.00752	0.00374651	MMP1, MMP2, MMP3, MMP9	133	46	19453	12.7185	0.999873	0.036399	0.0325459
GOTERM_BP_DIRECT	GO:0070498~interleukin-1-mediated signaling pathway	4	3.00752	0.00374651	NFKBIA, IL1B, MAP3K7, RELA	133	46	19453	12.7185	0.999873	0.036399	0.0325459
GOTERM_BP_DIRECT	GO:2001171~positive regulation of ATP biosynthetic process	3	2.25564	0.00394212	IL4, MYC, PPARA	133	14	19453	31.3421	0.999921	0.0379906	0.033969
GOTERM_BP_DIRECT	GO:0019430~removal of superoxide radicals	3	2.25564	0.00394212	NOS3, SOD2, MPO	133	14	19453	31.3421	0.999921	0.0379906	0.033969
GOTERM_BP_DIRECT	GO:0050673~epithelial cell proliferation	4	3.00752	0.00398231	AR, EGF, HGF, BAK1	133	47	19453	12.4479	0.999928	0.0382237	0.0341775
GOTERM_BP_DIRECT	GO:0098586~cellular response to virus	5	3.7594	0.00400502	TGFB1, IFNG, BAX, MAPK14, NFKB1	133	95	19453	7.69806	0.999932	0.038288	0.0342349
GOTERM_BP_DIRECT	GO:0050731~positive regulation of peptidyl-tyrosine phosphorylation	5	3.7594	0.00415754	TGFB1, EGF, HGF, IGF2, TP53	133	96	19453	7.61787	0.999953	0.0395877	0.035397
GOTERM_BP_DIRECT	GO:0071364~cellular response to epidermal growth factor stimulus	4	3.00752	0.00422694	MYC, ERBB2, AKT1, FOS	133	48	19453	12.1886	0.99996	0.0400889	0.0358452
GOTERM_BP_DIRECT	GO:0006749~glutathione metabolic process	4	3.00752	0.00448052	GSTM2, GSTP1, GSTA1, SOD2	133	49	19453	11.9398	0.999978	0.0417878	0.0373642
GOTERM_BP_DIRECT	GO:0045348~positive regulation of MHC class II biosynthetic process	3	2.25564	0.00452846	IL10, IL4, IFNG	133	15	19453	29.2526	0.999981	0.0417878	0.0373642
GOTERM_BP_DIRECT	GO:0034116~positive regulation of heterotypic cell-cell adhesion	3	2.25564	0.00452846	IL10, IL1B, TNF	133	15	19453	29.2526	0.999981	0.0417878	0.0373642
GOTERM_BP_DIRECT	GO:0097049~motor neuron apoptotic process	3	2.25564	0.00452846	ERBB3, BCL2, BAX	133	15	19453	29.2526	0.999981	0.0417878	0.0373642
GOTERM_BP_DIRECT	GO:1904645~response to beta-amyloid	3	2.25564	0.00452846	MMP2, MMP3, MMP9	133	15	19453	29.2526	0.999981	0.0417878	0.0373642
GOTERM_BP_DIRECT	GO:0010884~positive regulation of lipid storage	3	2.25564	0.00452846	C3, ACACB, NFKB1	133	15	19453	29.2526	0.999981	0.0417878	0.0373642
GOTERM_BP_DIRECT	GO:0010524~positive regulation of calcium ion transport into cytosol	3	2.25564	0.00452846	CAV1, BAX, BAK1	133	15	19453	29.2526	0.999981	0.0417878	0.0373642
GOTERM_BP_DIRECT	GO:0046330~positive regulation of JNK cascade	5	3.7594	0.00463852	IL1A, IL1B, XIAP, TNF, NAIP	133	99	19453	7.38703	0.999985	0.0424754	0.037979
GOTERM_BP_DIRECT	GO:0006631~fatty acid metabolic process	5	3.7594	0.00463852	C3, CYP1A1, PPARG, PPARA, PPARD	133	99	19453	7.38703	0.999985	0.0424754	0.037979
GOTERM_BP_DIRECT	GO:0050714~positive regulation of protein secretion	4	3.00752	0.00474313	IL1A, ACHE, TGFB1, VEGFC	133	50	19453	11.7011	0.999988	0.0432675	0.0386873
GOTERM_BP_DIRECT	GO:0060402~calcium ion transport into cytosol	3	2.25564	0.00515249	BCL2, BAX, BAK1	133	16	19453	27.4243	0.999996	0.0464696	0.0415504
GOTERM_BP_DIRECT	GO:0019395~fatty acid oxidation	3	2.25564	0.00515249	POR, PPARG, MAPK14	133	16	19453	27.4243	0.999996	0.0464696	0.0415504
GOTERM_BP_DIRECT	GO:0035729~cellular response to hepatocyte growth factor stimulus	3	2.25564	0.00515249	IL10, HGF, RELA	133	16	19453	27.4243	0.999996	0.0464696	0.0415504
GOTERM_BP_DIRECT	GO:0034605~cellular response to heat	4	3.00752	0.00529581	IL1A, HMOX1, PRKACA, PTGS2	133	52	19453	11.251	0.999997	0.0475826	0.0425457
GOTERM_BP_DIRECT	GO:0055093~response to hyperoxia	3	2.25564	0.00581366	MMP2, CYP1A1, SOD2	133	17	19453	25.8111	0.999999	0.0516529	0.0461851
GOTERM_BP_DIRECT	GO:0071732~cellular response to nitric oxide	3	2.25564	0.00581366	CCNA2, CDK2, MMP3	133	17	19453	25.8111	0.999999	0.0516529	0.0461851
GOTERM_BP_DIRECT	GO:0048143~astrocyte activation	3	2.25564	0.00581366	IFNG, IL1B, TNF	133	17	19453	25.8111	0.999999	0.0516529	0.0461851
GOTERM_BP_DIRECT	GO:0000079~regulation of cyclin-dependent protein serine/threonine kinase activity	4	3.00752	0.00588566	CCNA2, CCND3, CCNB1, CDKN2A	133	54	19453	10.8343	0.999999	0.052099	0.0465839
GOTERM_BP_DIRECT	GO:0006366~transcription from RNA polymerase II promoter	7	5.26316	0.00608876	AR, PARP1, MYC, FOS, MAPK14, NFKB1, IL2	133	241	19453	4.24831	1	0.0536979	0.0480136
GOTERM_BP_DIRECT	GO:0044849~estrous cycle	3	2.25564	0.00651145	PCNA, CYP1B1, HAS2	133	18	19453	24.3772	1	0.0557952	0.0498889
GOTERM_BP_DIRECT	GO:0032270~positive regulation of cellular protein metabolic process	3	2.25564	0.00651145	NFKBIA, TGFB1, AKT1	133	18	19453	24.3772	1	0.0557952	0.0498889
GOTERM_BP_DIRECT	GO:0042176~regulation of protein catabolic process	3	2.25564	0.00651145	CHEK2, ODC1, MDM2	133	18	19453	24.3772	1	0.0557952	0.0498889
GOTERM_BP_DIRECT	GO:0008631~intrinsic apoptotic signaling pathway in response to oxidative stress	3	2.25564	0.00651145	BCL2, CYP1B1, SOD2	133	18	19453	24.3772	1	0.0557952	0.0498889
GOTERM_BP_DIRECT	GO:0050995~negative regulation of lipid catabolic process	3	2.25564	0.00651145	IL1B, TNF, ADRA2A	133	18	19453	24.3772	1	0.0557952	0.0498889
GOTERM_BP_DIRECT	GO:0051412~response to corticosterone	3	2.25564	0.00651145	MAOB, FOS, CALM2	133	18	19453	24.3772	1	0.0557952	0.0498889
GOTERM_BP_DIRECT	GO:0035234~ectopic germ cell programmed cell death	3	2.25564	0.00651145	IL1A, IL1B, BAX	133	18	19453	24.3772	1	0.0557952	0.0498889
GOTERM_BP_DIRECT	GO:0038061~NIK/NF-kappaB signaling	4	3.00752	0.00651333	NFKBIA, AKT1, RELA, NFKB1	133	56	19453	10.4474	1	0.0557952	0.0498889
GOTERM_BP_DIRECT	GO:0090398~cellular senescence	4	3.00752	0.00684154	CDKN2A, CDK2, MAPK14, TP53	133	57	19453	10.2641	1	0.0583974	0.0522156
GOTERM_BP_DIRECT	GO:0008053~mitochondrial fusion	3	2.25564	0.00724535	BAX, BAK1, MCL1	133	19	19453	23.0942	1	0.0609732	0.0545187
GOTERM_BP_DIRECT	GO:0032469~endoplasmic reticulum calcium ion homeostasis	3	2.25564	0.00724535	BCL2, BAX, BAK1	133	19	19453	23.0942	1	0.0609732	0.0545187
GOTERM_BP_DIRECT	GO:0030889~negative regulation of B cell proliferation	3	2.25564	0.00724535	IL10, CDKN2A, CASP3	133	19	19453	23.0942	1	0.0609732	0.0545187
GOTERM_BP_DIRECT	GO:2000811~negative regulation of anoikis	3	2.25564	0.00724535	CAV1, BCL2, MCL1	133	19	19453	23.0942	1	0.0609732	0.0545187
GOTERM_BP_DIRECT	GO:0006351~transcription, DNA-templated	5	3.7594	0.00760833	CCNA2, CDK2, E2F1, RELA, RUNX1T1	133	114	19453	6.41505	1	0.0638032	0.0570491
GOTERM_BP_DIRECT	GO:0007254~JNK cascade	4	3.00752	0.00788445	IL1B, TNF, MAP3K7, NFKB1	133	60	19453	9.75088	1	0.0656009	0.0586566
GOTERM_BP_DIRECT	GO:0071375~cellular response to peptide hormone stimulus	3	2.25564	0.00801484	POR, CAV1, MDM2	133	20	19453	21.9395	1	0.0656009	0.0586566
GOTERM_BP_DIRECT	GO:0032930~positive regulation of superoxide anion generation	3	2.25564	0.00801484	CRP, TGFB1, GSTP1	133	20	19453	21.9395	1	0.0656009	0.0586566
GOTERM_BP_DIRECT	GO:0045862~positive regulation of proteolysis	3	2.25564	0.00801484	CASP8, BAK1, FGFR4	133	20	19453	21.9395	1	0.0656009	0.0586566
GOTERM_BP_DIRECT	GO:0033189~response to vitamin A	3	2.25564	0.00801484	CYP1A1, PPARG, PPARD	133	20	19453	21.9395	1	0.0656009	0.0586566
GOTERM_BP_DIRECT	GO:0097202~activation of cysteine-type endopeptidase activity	3	2.25564	0.00801484	CASP9, CASP8, BAK1	133	20	19453	21.9395	1	0.0656009	0.0586566
GOTERM_BP_DIRECT	GO:0071548~response to dexamethasone	3	2.25564	0.00801484	POR, PCNA, CYP1B1	133	20	19453	21.9395	1	0.0656009	0.0586566
GOTERM_BP_DIRECT	GO:0046777~protein autophosphorylation	6	4.51128	0.00807516	GSK3B, CHEK2, ERBB2, AKT1, FGFR4, PRKACA	133	182	19453	4.82186	1	0.065869	0.0588963
GOTERM_BP_DIRECT	GO:0043651~linoleic acid metabolic process	3	2.25564	0.00881941	GSTM2, GSTP1, GSTA1	133	21	19453	20.8947	1	0.0698259	0.0624343
GOTERM_BP_DIRECT	GO:0006977~DNA damage response, signal transduction by p53 class mediator resulting in cell cycle arrest	3	2.25564	0.00881941	CHEK2, MDM2, TP53	133	21	19453	20.8947	1	0.0698259	0.0624343
GOTERM_BP_DIRECT	GO:0043401~steroid hormone mediated signaling pathway	3	2.25564	0.00881941	RXRA, PPARA, PPARD	133	21	19453	20.8947	1	0.0698259	0.0624343
GOTERM_BP_DIRECT	GO:0006693~prostaglandin metabolic process	3	2.25564	0.00881941	GSTP1, GSTA1, AKR1C3	133	21	19453	20.8947	1	0.0698259	0.0624343
GOTERM_BP_DIRECT	GO:0090201~negative regulation of release of cytochrome c from mitochondria	3	2.25564	0.00881941	HGF, AKT1, BAK1	133	21	19453	20.8947	1	0.0698259	0.0624343
GOTERM_BP_DIRECT	GO:0042759~long-chain fatty acid biosynthetic process	3	2.25564	0.00881941	CYP1A2, CYP1A1, CYP3A4	133	21	19453	20.8947	1	0.0698259	0.0624343
GOTERM_BP_DIRECT	GO:0033554~cellular response to stress	3	2.25564	0.00881941	PRDX4, RELA, NFKB1	133	21	19453	20.8947	1	0.0698259	0.0624343
GOTERM_BP_DIRECT	GO:0002526~acute inflammatory response	3	2.25564	0.00881941	VCAM1, TNF, ADRA2A	133	21	19453	20.8947	1	0.0698259	0.0624343
GOTERM_BP_DIRECT	GO:0001822~kidney development	5	3.7594	0.00882318	CDKN1C, CASP9, ODC1, BAX, HAS2	133	119	19453	6.14551	1	0.0698259	0.0624343
GOTERM_BP_DIRECT	GO:0042110~T cell activation	4	3.00752	0.00901613	DPP4, IL4, CASP8, PIK3CG	133	63	19453	9.28655	1	0.0708834	0.0633798
GOTERM_BP_DIRECT	GO:0043627~response to estrogen	4	3.00752	0.00901613	CAV1, MMP2, HMOX1, PPARG	133	63	19453	9.28655	1	0.0708834	0.0633798
GOTERM_BP_DIRECT	GO:0045088~regulation of innate immune response	3	2.25564	0.00965856	CASP8, XIAP, NFE2L2	133	22	19453	19.945	1	0.0756851	0.0676733
GOTERM_BP_DIRECT	GO:0006469~negative regulation of protein kinase activity	4	3.00752	0.0111036	CDKN2A, GSTP1, HSPB1, AKT1	133	68	19453	8.60372	1	0.0864415	0.077291
GOTERM_BP_DIRECT	GO:0042531~positive regulation of tyrosine phosphorylation of STAT protein	4	3.00752	0.0111036	IL4, IFNG, TNF, IL2	133	68	19453	8.60372	1	0.0864415	0.077291
GOTERM_BP_DIRECT	GO:0001649~osteoblast differentiation	5	3.7594	0.0113159	GJA1, SPP1, IGF2, AKT1, MAPK14	133	128	19453	5.7134	1	0.0878081	0.0785129
GOTERM_BP_DIRECT	GO:0051247~positive regulation of protein metabolic process	3	2.25564	0.0114386	NFKBIA, TGFB1, AKT1	133	24	19453	18.2829	1	0.0879043	0.078599
GOTERM_BP_DIRECT	GO:0010881~regulation of cardiac muscle contraction by regulation of the release of sequestered calcium ion	3	2.25564	0.0114386	GSTM2, PRKACA, CALM2	133	24	19453	18.2829	1	0.0879043	0.078599
GOTERM_BP_DIRECT	GO:0048260~positive regulation of receptor-mediated endocytosis	3	2.25564	0.0114386	IL4, C3, SERPINE1	133	24	19453	18.2829	1	0.0879043	0.078599
GOTERM_BP_DIRECT	GO:0008286~insulin receptor signaling pathway	4	3.00752	0.0120101	GSK3B, IGF2, AKT1, RAF1	133	70	19453	8.35789	1	0.0917066	0.0819987
GOTERM_BP_DIRECT	GO:0009749~response to glucose	4	3.00752	0.0120101	TGFB1, PRKCB, CASP3, PPARD	133	70	19453	8.35789	1	0.0917066	0.0819987
GOTERM_BP_DIRECT	GO:0044772~mitotic cell cycle phase transition	3	2.25564	0.0123785	CCNA2, CCND3, CCNB1	133	25	19453	17.5516	1	0.0930334	0.0831851
GOTERM_BP_DIRECT	GO:0007569~cell aging	3	2.25564	0.0123785	BCL2, CDK1, TP53	133	25	19453	17.5516	1	0.0930334	0.0831851
GOTERM_BP_DIRECT	GO:0036120~cellular response to platelet-derived growth factor stimulus	3	2.25564	0.0123785	CCNA2, MYC, HAS2	133	25	19453	17.5516	1	0.0930334	0.0831851
GOTERM_BP_DIRECT	GO:0046686~response to cadmium ion	3	2.25564	0.0123785	PCNA, CDK1, SOD2	133	25	19453	17.5516	1	0.0930334	0.0831851
GOTERM_BP_DIRECT	GO:0051000~positive regulation of nitric-oxide synthase activity	3	2.25564	0.0123785	AKT1, TNF, CALM2	133	25	19453	17.5516	1	0.0930334	0.0831851
GOTERM_BP_DIRECT	GO:0090263~positive regulation of canonical Wnt signaling pathway	5	3.7594	0.0128853	TGFB1, EGF, CAV1, XIAP, NFKB1	133	133	19453	5.49861	1	0.0964786	0.0862656
GOTERM_BP_DIRECT	GO:1901224~positive regulation of NIK/NF-kappaB signaling	4	3.00752	0.012958	IL1B, TNF, RELA, NR3C2	133	72	19453	8.12573	1	0.0964786	0.0862656
GOTERM_BP_DIRECT	GO:0071300~cellular response to retinoic acid	4	3.00752	0.012958	GSK3B, MYC, PPARG, TNF	133	72	19453	8.12573	1	0.0964786	0.0862656
GOTERM_BP_DIRECT	GO:0034142~toll-like receptor 4 signaling pathway	3	2.25564	0.013351	NFKBIA, MAP3K7, RELA	133	26	19453	16.8765	1	0.0979572	0.0875877
GOTERM_BP_DIRECT	GO:0003057~regulation of the force of heart contraction by chemical signal	2	1.50376	0.0135255	NOS3, CAV1	133	2	19453	146.263	1	0.0979572	0.0875877
GOTERM_BP_DIRECT	GO:0006808~regulation of nitrogen utilization	2	1.50376	0.0135255	BCL2, BAX	133	2	19453	146.263	1	0.0979572	0.0875877
GOTERM_BP_DIRECT	GO:0002439~chronic inflammatory response to antigenic stimulus	2	1.50376	0.0135255	IL10, TNF	133	2	19453	146.263	1	0.0979572	0.0875877
GOTERM_BP_DIRECT	GO:0014806~smooth muscle hyperplasia	2	1.50376	0.0135255	NOS3, HMOX1	133	2	19453	146.263	1	0.0979572	0.0875877
GOTERM_BP_DIRECT	GO:0071887~leukocyte apoptotic process	2	1.50376	0.0135255	CASP9, CASP3	133	2	19453	146.263	1	0.0979572	0.0875877
GOTERM_BP_DIRECT	GO:0060557~positive regulation of vitamin D biosynthetic process	2	1.50376	0.0135255	IFNG, TNF	133	2	19453	146.263	1	0.0979572	0.0875877
GOTERM_BP_DIRECT	GO:1990268~response to gold nanoparticle	2	1.50376	0.0135255	MPO, TNF	133	2	19453	146.263	1	0.0979572	0.0875877
GOTERM_BP_DIRECT	GO:0002352~B cell negative selection	2	1.50376	0.0135255	BAX, BAK1	133	2	19453	146.263	1	0.0979572	0.0875877
GOTERM_BP_DIRECT	GO:0032094~response to food	3	2.25564	0.0143557	CYP1A1, AKT1, MPO	133	27	19453	16.2515	1	0.103343	0.0924038
GOTERM_BP_DIRECT	GO:0045672~positive regulation of osteoclast differentiation	3	2.25564	0.0143557	IFNG, FOS, TNF	133	27	19453	16.2515	1	0.103343	0.0924038
GOTERM_BP_DIRECT	GO:0009611~response to wounding	4	3.00752	0.0149789	TGFB1, MYC, CASP3, CYP1A1	133	76	19453	7.69806	1	0.107507	0.0961262
GOTERM_BP_DIRECT	GO:0060391~positive regulation of SMAD protein import into nucleus	3	2.25564	0.015392	TGFB1, PARP1, PPARG	133	28	19453	15.6711	1	0.108516	0.0970285
GOTERM_BP_DIRECT	GO:0043200~response to amino acid	3	2.25564	0.015392	CASP3, BCL2, RELA	133	28	19453	15.6711	1	0.108516	0.0970285
GOTERM_BP_DIRECT	GO:0045736~negative regulation of cyclin-dependent protein serine/threonine kinase activity	3	2.25564	0.015392	CDKN1C, CDKN2A, PTEN	133	28	19453	15.6711	1	0.108516	0.0970285
GOTERM_BP_DIRECT	GO:0060333~interferon-gamma-mediated signaling pathway	3	2.25564	0.015392	IFNG, RAF1, TP53	133	28	19453	15.6711	1	0.108516	0.0970285
GOTERM_BP_DIRECT	GO:0010804~negative regulation of tumor necrosis factor-mediated signaling pathway	3	2.25564	0.015392	GSTP1, XIAP, NAIP	133	28	19453	15.6711	1	0.108516	0.0970285
GOTERM_BP_DIRECT	GO:0045740~positive regulation of DNA replication	3	2.25564	0.015392	PCNA, EGF, CDK1	133	28	19453	15.6711	1	0.108516	0.0970285
GOTERM_BP_DIRECT	GO:0045662~negative regulation of myoblast differentiation	3	2.25564	0.0164595	TGFB1, TNF, PPARD	133	29	19453	15.1307	1	0.1157	0.103453
GOTERM_BP_DIRECT	GO:0033209~tumor necrosis factor-mediated signaling pathway	4	3.00752	0.016605	NFKBIA, TNF, TP53, RELA	133	79	19453	7.40573	1	0.116381	0.104061
GOTERM_BP_DIRECT	GO:0045930~negative regulation of mitotic cell cycle	3	2.25564	0.0175577	IL10, CDKN1C, TNF	133	30	19453	14.6263	1	0.122341	0.10939
GOTERM_BP_DIRECT	GO:0010800~positive regulation of peptidyl-threonine phosphorylation	3	2.25564	0.0175577	TGFB1, EGF, CALM2	133	30	19453	14.6263	1	0.122341	0.10939
GOTERM_BP_DIRECT	GO:0031398~positive regulation of protein ubiquitination	4	3.00752	0.0177419	GSK3B, RASSF3, CAV1, XIAP	133	81	19453	7.22287	1	0.123265	0.110216
GOTERM_BP_DIRECT	GO:0070372~regulation of ERK1 and ERK2 cascade	3	2.25564	0.0186862	IL1B, GSTP1, ERBB2	133	31	19453	14.1545	1	0.129075	0.115411
GOTERM_BP_DIRECT	GO:0048873~homeostasis of number of cells within a tissue	3	2.25564	0.0186862	NOS3, BCL2, BAX	133	31	19453	14.1545	1	0.129075	0.115411
GOTERM_BP_DIRECT	GO:0001933~negative regulation of protein phosphorylation	4	3.00752	0.020143	TGFB1, PTEN, XDH, IL2	133	85	19453	6.88297	1	0.134612	0.120362
GOTERM_BP_DIRECT	GO:1900100~positive regulation of plasma cell differentiation	2	1.50376	0.02022	IL10, IL2	133	3	19453	97.5088	1	0.134612	0.120362
GOTERM_BP_DIRECT	GO:2000630~positive regulation of miRNA metabolic process	2	1.50376	0.02022	RELA, NFKB1	133	3	19453	97.5088	1	0.134612	0.120362
GOTERM_BP_DIRECT	GO:0051048~negative regulation of secretion	2	1.50376	0.02022	ERBB3, EGF	133	3	19453	97.5088	1	0.134612	0.120362
GOTERM_BP_DIRECT	GO:0046666~retinal cell programmed cell death	2	1.50376	0.02022	BCL2, BAX	133	3	19453	97.5088	1	0.134612	0.120362
GOTERM_BP_DIRECT	GO:0018894~dibenzo-p-dioxin metabolic process	2	1.50376	0.02022	PRKCB, CYP1A2	133	3	19453	97.5088	1	0.134612	0.120362
GOTERM_BP_DIRECT	GO:0034349~glial cell apoptotic process	2	1.50376	0.02022	CASP9, CASP3	133	3	19453	97.5088	1	0.134612	0.120362
GOTERM_BP_DIRECT	GO:0002679~respiratory burst involved in defense response	2	1.50376	0.02022	MPO, PIK3CG	133	3	19453	97.5088	1	0.134612	0.120362
GOTERM_BP_DIRECT	GO:0034465~response to carbon monoxide	2	1.50376	0.02022	IL10, KCNMA1	133	3	19453	97.5088	1	0.134612	0.120362
GOTERM_BP_DIRECT	GO:0002904~positive regulation of B cell apoptotic process	2	1.50376	0.02022	IL10, BAX	133	3	19453	97.5088	1	0.134612	0.120362
GOTERM_BP_DIRECT	GO:0071322~cellular response to carbohydrate stimulus	2	1.50376	0.02022	PRKCB, MYC	133	3	19453	97.5088	1	0.134612	0.120362
GOTERM_BP_DIRECT	GO:1990646~cellular response to prolactin	2	1.50376	0.02022	MYC, FOS	133	3	19453	97.5088	1	0.134612	0.120362
GOTERM_BP_DIRECT	GO:0001660~fever generation	2	1.50376	0.02022	IL1A, IL1B	133	3	19453	97.5088	1	0.134612	0.120362
GOTERM_BP_DIRECT	GO:0070374~positive regulation of ERK1 and ERK2 cascade	6	4.51128	0.0204083	IL1A, JUN, TGFB1, PTEN, FGFR4, TNF	133	230	19453	3.81556	1	0.135488	0.121146
GOTERM_BP_DIRECT	GO:0016485~protein processing	4	3.00752	0.0207699	CASP9, CASP7, CASP3, F3	133	86	19453	6.80294	1	0.137507	0.122951
GOTERM_BP_DIRECT	GO:0016239~positive regulation of macroautophagy	3	2.25564	0.0210321	IL4, HMOX1, MAP3K7	133	33	19453	13.2967	1	0.138859	0.124159
GOTERM_BP_DIRECT	GO:0001503~ossification	4	3.00752	0.0214074	BCL2, SPP1, IGF2, MMP9	133	87	19453	6.72474	1	0.140947	0.126027
GOTERM_BP_DIRECT	GO:0007267~cell-cell signaling	6	4.51128	0.0217966	AR, GJA1, IL1B, CXCL13, ESR2, IL2	133	234	19453	3.75034	1	0.143115	0.127965
GOTERM_BP_DIRECT	GO:0070269~pyroptosis	3	2.25564	0.0222487	CASP8, CASP3, NAIP	133	34	19453	12.9056	1	0.144496	0.1292
GOTERM_BP_DIRECT	GO:0010033~response to organic substance	3	2.25564	0.0222487	CDK2, MMP9, RELA	133	34	19453	12.9056	1	0.144496	0.1292
GOTERM_BP_DIRECT	GO:2001234~negative regulation of apoptotic signaling pathway	3	2.25564	0.0222487	BCL2, BAX, TNF	133	34	19453	12.9056	1	0.144496	0.1292
GOTERM_BP_DIRECT	GO:0030522~intracellular receptor signaling pathway	3	2.25564	0.0222487	AR, PPARA, PPARD	133	34	19453	12.9056	1	0.144496	0.1292
GOTERM_BP_DIRECT	GO:0030307~positive regulation of cell growth	4	3.00752	0.0247549	ERBB2, BCL2, AKT1, IL2	133	92	19453	6.35927	1	0.160337	0.143364
GOTERM_BP_DIRECT	GO:0031647~regulation of protein stability	4	3.00752	0.0254564	CDKN2A, CASP3, PTEN, BCL2	133	93	19453	6.29089	1	0.164434	0.147028
GOTERM_BP_DIRECT	GO:0030154~cell differentiation	11	8.27068	0.0255463	RXRA, RBL1, CAV1, AKT1, PPARG, RAF1, PPARA, ELK1, COL19A1, MCL1, PPARD	133	723	19453	2.2253	1	0.164571	0.14715
GOTERM_BP_DIRECT	GO:0032743~positive regulation of interleukin-2 production	3	2.25564	0.0260675	IL1A, IL1B, MAP3K7	133	37	19453	11.8592	1	0.165256	0.147762
GOTERM_BP_DIRECT	GO:0034612~response to tumor necrosis factor	3	2.25564	0.0260675	CASP8, CASP3, PTGS2	133	37	19453	11.8592	1	0.165256	0.147762
GOTERM_BP_DIRECT	GO:0002027~regulation of heart rate	3	2.25564	0.0260675	MDM2, PRKACA, CALM2	133	37	19453	11.8592	1	0.165256	0.147762
GOTERM_BP_DIRECT	GO:2001244~positive regulation of intrinsic apoptotic signaling pathway	3	2.25564	0.0260675	CAV1, BAX, TP53	133	37	19453	11.8592	1	0.165256	0.147762
GOTERM_BP_DIRECT	GO:0046326~positive regulation of glucose import	3	2.25564	0.0260675	AKT1, MAPK14, NFE2L2	133	37	19453	11.8592	1	0.165256	0.147762
GOTERM_BP_DIRECT	GO:0043122~regulation of I-kappaB kinase/NF-kappaB signaling	3	2.25564	0.0260675	IL1B, HSPB1, TNF	133	37	19453	11.8592	1	0.165256	0.147762
GOTERM_BP_DIRECT	GO:1905448~positive regulation of mitochondrial ATP synthesis coupled electron transport	2	1.50376	0.0268694	CCNB1, CDK1	133	4	19453	73.1316	1	0.166603	0.148967
GOTERM_BP_DIRECT	GO:0045191~regulation of isotype switching	2	1.50376	0.0268694	IL10, IL4	133	4	19453	73.1316	1	0.166603	0.148967
GOTERM_BP_DIRECT	GO:0030730~sequestering of triglyceride	2	1.50376	0.0268694	IL1B, TNF	133	4	19453	73.1316	1	0.166603	0.148967
GOTERM_BP_DIRECT	GO:0048597~post-embryonic camera-type eye morphogenesis	2	1.50376	0.0268694	BAX, BAK1	133	4	19453	73.1316	1	0.166603	0.148967
GOTERM_BP_DIRECT	GO:0072717~cellular response to actinomycin D	2	1.50376	0.0268694	MDM2, TP53	133	4	19453	73.1316	1	0.166603	0.148967
GOTERM_BP_DIRECT	GO:0038133~ERBB2-ERBB3 signaling pathway	2	1.50376	0.0268694	ERBB3, ERBB2	133	4	19453	73.1316	1	0.166603	0.148967
GOTERM_BP_DIRECT	GO:1990086~lens fiber cell apoptotic process	2	1.50376	0.0268694	E2F1, E2F2	133	4	19453	73.1316	1	0.166603	0.148967
GOTERM_BP_DIRECT	GO:0036005~response to macrophage colony-stimulating factor	2	1.50376	0.0268694	SPP1, TNF	133	4	19453	73.1316	1	0.166603	0.148967
GOTERM_BP_DIRECT	GO:0006338~chromatin remodeling	7	5.26316	0.0271999	PRKCB, MYC, CHEK1, CDK2, CDK1, TOP1, MAP3K7	133	336	19453	3.04715	1	0.166603	0.148967
GOTERM_BP_DIRECT	GO:0042113~B cell activation	3	2.25564	0.0273954	IL4, CASP8, PRKCB	133	38	19453	11.5471	1	0.166603	0.148967
GOTERM_BP_DIRECT	GO:1990090~cellular response to nerve growth factor stimulus	3	2.25564	0.0273954	PARP1, E2F1, AKT1	133	38	19453	11.5471	1	0.166603	0.148967
GOTERM_BP_DIRECT	GO:0048144~fibroblast proliferation	3	2.25564	0.0273954	CAV1, CDK1, TP53	133	38	19453	11.5471	1	0.166603	0.148967
GOTERM_BP_DIRECT	GO:0072593~reactive oxygen species metabolic process	3	2.25564	0.0273954	PRDX4, BCL2, TP53	133	38	19453	11.5471	1	0.166603	0.148967
GOTERM_BP_DIRECT	GO:0048678~response to axon injury	3	2.25564	0.0273954	CDK1, BAX, SOD2	133	38	19453	11.5471	1	0.166603	0.148967
GOTERM_BP_DIRECT	GO:0043029~T cell homeostasis	3	2.25564	0.0273954	TGFB1, CASP3, BCL2	133	38	19453	11.5471	1	0.166603	0.148967
GOTERM_BP_DIRECT	GO:0008219~cell death	3	2.25564	0.0273954	PTGER3, HMOX1, OLR1	133	38	19453	11.5471	1	0.166603	0.148967
GOTERM_BP_DIRECT	GO:0007190~activation of adenylate cyclase activity	3	2.25564	0.0287501	ADCY2, RAF1, CALM2	133	39	19453	11.251	1	0.173517	0.155149
GOTERM_BP_DIRECT	GO:0001937~negative regulation of endothelial cell proliferation	3	2.25564	0.0287501	CAV1, TNF, XDH	133	39	19453	11.251	1	0.173517	0.155149
GOTERM_BP_DIRECT	GO:0010975~regulation of neuron projection development	3	2.25564	0.0287501	GSK3B, PTEN, AKT1	133	39	19453	11.251	1	0.173517	0.155149
GOTERM_BP_DIRECT	GO:0043537~negative regulation of blood vessel endothelial cell migration	3	2.25564	0.030131	TGFB1, PPARG, TNF	133	40	19453	10.9697	1	0.181393	0.162191
GOTERM_BP_DIRECT	GO:0030855~epithelial cell differentiation	4	3.00752	0.0314501	PCNA, GSTA1, CDK1, PPARG	133	101	19453	5.7926	1	0.188859	0.168867
GOTERM_BP_DIRECT	GO:0071479~cellular response to ionizing radiation	3	2.25564	0.0315379	TGFB1, MAPK14, TP53	133	41	19453	10.7022	1	0.188911	0.168914
GOTERM_BP_DIRECT	GO:0046627~negative regulation of insulin receptor signaling pathway	3	2.25564	0.0329703	PRKCB, IL1B, RELA	133	42	19453	10.4474	1	0.191853	0.171544
GOTERM_BP_DIRECT	GO:1901796~regulation of signal transduction by p53 class mediator	3	2.25564	0.0329703	CHEK2, CHEK1, AKT1	133	42	19453	10.4474	1	0.191853	0.171544
GOTERM_BP_DIRECT	GO:0010829~negative regulation of glucose transport	2	1.50376	0.033474	PRKCB, IL1B	133	5	19453	58.5053	1	0.191853	0.171544
GOTERM_BP_DIRECT	GO:0031999~negative regulation of fatty acid beta-oxidation	2	1.50376	0.033474	AKT1, ACACB	133	5	19453	58.5053	1	0.191853	0.171544
GOTERM_BP_DIRECT	GO:1903845~negative regulation of cellular response to transforming growth factor beta stimulus	2	1.50376	0.033474	IL4, PPARG	133	5	19453	58.5053	1	0.191853	0.171544
GOTERM_BP_DIRECT	GO:0072734~cellular response to staurosporine	2	1.50376	0.033474	CASP7, CASP3	133	5	19453	58.5053	1	0.191853	0.171544
GOTERM_BP_DIRECT	GO:1900103~positive regulation of endoplasmic reticulum unfolded protein response	2	1.50376	0.033474	BAX, BAK1	133	5	19453	58.5053	1	0.191853	0.171544
GOTERM_BP_DIRECT	GO:0006778~porphyrin-containing compound metabolic process	2	1.50376	0.033474	CYP1A2, CYP1A1	133	5	19453	58.5053	1	0.191853	0.171544
GOTERM_BP_DIRECT	GO:0002326~B cell lineage commitment	2	1.50376	0.033474	BCL2, TP53	133	5	19453	58.5053	1	0.191853	0.171544
GOTERM_BP_DIRECT	GO:0070427~nucleotide-binding oligomerization domain containing 1 signaling pathway	2	1.50376	0.033474	NFKBIA, XIAP	133	5	19453	58.5053	1	0.191853	0.171544
GOTERM_BP_DIRECT	GO:0035900~response to isolation stress	2	1.50376	0.033474	SOD2, TNF	133	5	19453	58.5053	1	0.191853	0.171544
GOTERM_BP_DIRECT	GO:1902262~apoptotic process involved in blood vessel morphogenesis	2	1.50376	0.033474	BAX, BAK1	133	5	19453	58.5053	1	0.191853	0.171544
GOTERM_BP_DIRECT	GO:0032310~prostaglandin secretion	2	1.50376	0.033474	NOS2, PTGS2	133	5	19453	58.5053	1	0.191853	0.171544
GOTERM_BP_DIRECT	GO:0046222~aflatoxin metabolic process	2	1.50376	0.033474	CYP1A2, CYP3A4	133	5	19453	58.5053	1	0.191853	0.171544
GOTERM_BP_DIRECT	GO:0010716~negative regulation of extracellular matrix disassembly	2	1.50376	0.033474	DPP4, TGFB1	133	5	19453	58.5053	1	0.191853	0.171544
GOTERM_BP_DIRECT	GO:0060965~negative regulation of gene silencing by miRNA	2	1.50376	0.033474	TGFB1, PPARG	133	5	19453	58.5053	1	0.191853	0.171544
GOTERM_BP_DIRECT	GO:0002248~connective tissue replacement involved in inflammatory response wound healing	2	1.50376	0.033474	IL1A, TGFB1	133	5	19453	58.5053	1	0.191853	0.171544
GOTERM_BP_DIRECT	GO:0009750~response to fructose	2	1.50376	0.033474	PTGS2, TNF	133	5	19453	58.5053	1	0.191853	0.171544
GOTERM_BP_DIRECT	GO:0031295~T cell costimulation	3	2.25564	0.0344279	DPP4, CAV1, AKT1	133	43	19453	10.2044	1	0.196378	0.17559
GOTERM_BP_DIRECT	GO:0007595~lactation	3	2.25564	0.0344279	CAV1, XDH, HK2	133	43	19453	10.2044	1	0.196378	0.17559
GOTERM_BP_DIRECT	GO:0032869~cellular response to insulin stimulus	4	3.00752	0.0355391	PARP1, MYC, AKT1, PPARG	133	106	19453	5.51936	1	0.202234	0.180826
GOTERM_BP_DIRECT	GO:0042098~T cell proliferation	3	2.25564	0.0359101	CCND3, GJA1, PIK3CG	133	44	19453	9.97249	1	0.203377	0.181848
GOTERM_BP_DIRECT	GO:0009725~response to hormone	3	2.25564	0.0359101	POR, NOS2, NOS3	133	44	19453	9.97249	1	0.203377	0.181848
GOTERM_BP_DIRECT	GO:0010468~regulation of gene expression	6	4.51128	0.0370906	IL10, MYC, CYP1A2, CDK2, MDM2, BCL2	133	270	19453	3.25029	1	0.209566	0.187382
GOTERM_BP_DIRECT	GO:0032760~positive regulation of tumor necrosis factor production	4	3.00752	0.0372479	IL1A, TGFB1, IFNG, HSPB1	133	108	19453	5.41715	1	0.20992	0.187698
GOTERM_BP_DIRECT	GO:0032735~positive regulation of interleukin-12 production	3	2.25564	0.0374166	IFNG, MAPK14, RELA	133	45	19453	9.75088	1	0.20992	0.187698
GOTERM_BP_DIRECT	GO:0032722~positive regulation of chemokine production	3	2.25564	0.0374166	IFNG, HMOX1, TNF	133	45	19453	9.75088	1	0.20992	0.187698
GOTERM_BP_DIRECT	GO:0007049~cell cycle	7	5.26316	0.0388122	CDKN1C, RBL1, CDKN2A, NUF2, MDM2, E2F2, TP53	133	366	19453	2.79738	1	0.215015	0.192254
GOTERM_BP_DIRECT	GO:0030890~positive regulation of B cell proliferation	3	2.25564	0.0389471	IL4, BCL2, IL2	133	46	19453	9.5389	1	0.215015	0.192254
GOTERM_BP_DIRECT	GO:0007155~cell adhesion	9	6.76692	0.0392256	DPP4, ACHE, CLDN4, VCAM1, SPP1, ICAM2, CYP1B1, IL2, COL19A1	133	566	19453	2.32574	1	0.215015	0.192254
GOTERM_BP_DIRECT	GO:0033088~negative regulation of immature T cell proliferation in thymus	2	1.50376	0.0400341	CDKN2A, ERBB2	133	6	19453	48.7544	1	0.215015	0.192254
GOTERM_BP_DIRECT	GO:1902512~positive regulation of apoptotic DNA fragmentation	2	1.50376	0.0400341	CASP3, BAX	133	6	19453	48.7544	1	0.215015	0.192254
GOTERM_BP_DIRECT	GO:0072656~maintenance of protein location in mitochondrion	2	1.50376	0.0400341	AKT1, HK2	133	6	19453	48.7544	1	0.215015	0.192254
GOTERM_BP_DIRECT	GO:0071455~cellular response to hyperoxia	2	1.50376	0.0400341	CAV1, PPARG	133	6	19453	48.7544	1	0.215015	0.192254
GOTERM_BP_DIRECT	GO:0033092~positive regulation of immature T cell proliferation in thymus	2	1.50376	0.0400341	IL1A, IL1B	133	6	19453	48.7544	1	0.215015	0.192254
GOTERM_BP_DIRECT	GO:0014856~skeletal muscle cell proliferation	2	1.50376	0.0400341	HGF, FOS	133	6	19453	48.7544	1	0.215015	0.192254
GOTERM_BP_DIRECT	GO:0097398~cellular response to interleukin-17	2	1.50376	0.0400341	IL1B, NFKB1	133	6	19453	48.7544	1	0.215015	0.192254
GOTERM_BP_DIRECT	GO:1903038~negative regulation of leukocyte cell-cell adhesion	2	1.50376	0.0400341	AKT1, PPARA	133	6	19453	48.7544	1	0.215015	0.192254
GOTERM_BP_DIRECT	GO:0033591~response to L-ascorbic acid	2	1.50376	0.0400341	IL1A, SOD2	133	6	19453	48.7544	1	0.215015	0.192254
GOTERM_BP_DIRECT	GO:0006706~steroid catabolic process	2	1.50376	0.0400341	CYP1A2, CYP3A4	133	6	19453	48.7544	1	0.215015	0.192254
GOTERM_BP_DIRECT	GO:0061419~positive regulation of transcription from RNA polymerase II promoter in response to hypoxia	2	1.50376	0.0400341	TP53, NFE2L2	133	6	19453	48.7544	1	0.215015	0.192254
GOTERM_BP_DIRECT	GO:0051712~positive regulation of killing of cells of other organism	2	1.50376	0.0400341	IFNG, NOS2	133	6	19453	48.7544	1	0.215015	0.192254
GOTERM_BP_DIRECT	GO:0031284~positive regulation of guanylate cyclase activity	2	1.50376	0.0400341	NOS2, NOS3	133	6	19453	48.7544	1	0.215015	0.192254
GOTERM_BP_DIRECT	GO:0010891~negative regulation of sequestering of triglyceride	2	1.50376	0.0400341	PPARG, PPARA	133	6	19453	48.7544	1	0.215015	0.192254
GOTERM_BP_DIRECT	GO:0060669~embryonic placenta morphogenesis	2	1.50376	0.0400341	CDKN1C, IGF2	133	6	19453	48.7544	1	0.215015	0.192254
GOTERM_BP_DIRECT	GO:0071373~cellular response to luteinizing hormone stimulus	2	1.50376	0.0400341	CCNA2, CYP1B1	133	6	19453	48.7544	1	0.215015	0.192254
GOTERM_BP_DIRECT	GO:0046427~positive regulation of JAK-STAT cascade	3	2.25564	0.0405011	IL10, CYP1B1, TNF	133	47	19453	9.33595	1	0.217035	0.19406
GOTERM_BP_DIRECT	GO:0030512~negative regulation of transforming growth factor beta receptor signaling pathway	4	3.00752	0.0426223	CAV1, PPARG, PPARA, TP53	133	114	19453	5.13204	1	0.227891	0.203767
GOTERM_BP_DIRECT	GO:0009408~response to heat	3	2.25564	0.0453004	NOS3, HSPB1, AKT1	133	50	19453	8.77579	1	0.23703	0.211939
GOTERM_BP_DIRECT	GO:0050766~positive regulation of phagocytosis	3	2.25564	0.0453004	IFNG, IL1B, TNF	133	50	19453	8.77579	1	0.23703	0.211939
GOTERM_BP_DIRECT	GO:0006527~arginine catabolic process	2	1.50376	0.0465501	NOS2, NOS3	133	7	19453	41.7895	1	0.23703	0.211939
GOTERM_BP_DIRECT	GO:0060355~positive regulation of cell adhesion molecule production	2	1.50376	0.0465501	IL1B, CAV1	133	7	19453	41.7895	1	0.23703	0.211939
GOTERM_BP_DIRECT	GO:0046483~heterocycle metabolic process	2	1.50376	0.0465501	CYP1A2, CYP3A4	133	7	19453	41.7895	1	0.23703	0.211939
GOTERM_BP_DIRECT	GO:0010573~vascular endothelial growth factor production	2	1.50376	0.0465501	IL1B, TNF	133	7	19453	41.7895	1	0.23703	0.211939
GOTERM_BP_DIRECT	GO:0072655~establishment of protein localization to mitochondrion	2	1.50376	0.0465501	AKT1, HK2	133	7	19453	41.7895	1	0.23703	0.211939
GOTERM_BP_DIRECT	GO:0002719~negative regulation of cytokine production involved in immune response	2	1.50376	0.0465501	IL10, TNF	133	7	19453	41.7895	1	0.23703	0.211939
GOTERM_BP_DIRECT	GO:0043504~mitochondrial DNA repair	2	1.50376	0.0465501	PARP1, TP53	133	7	19453	41.7895	1	0.23703	0.211939
GOTERM_BP_DIRECT	GO:1902462~positive regulation of mesenchymal stem cell proliferation	2	1.50376	0.0465501	TGFB1, VEGFC	133	7	19453	41.7895	1	0.23703	0.211939
GOTERM_BP_DIRECT	GO:0030213~hyaluronan biosynthetic process	2	1.50376	0.0465501	IL1B, HAS2	133	7	19453	41.7895	1	0.23703	0.211939
GOTERM_BP_DIRECT	GO:1903721~positive regulation of I-kappaB phosphorylation	2	1.50376	0.0465501	AKT1, TNF	133	7	19453	41.7895	1	0.23703	0.211939
GOTERM_BP_DIRECT	GO:0016098~monoterpenoid metabolic process	2	1.50376	0.0465501	CYP1A2, CYP3A4	133	7	19453	41.7895	1	0.23703	0.211939
GOTERM_BP_DIRECT	GO:0019217~regulation of fatty acid metabolic process	2	1.50376	0.0465501	CAV1, PPARA	133	7	19453	41.7895	1	0.23703	0.211939
GOTERM_BP_DIRECT	GO:0031394~positive regulation of prostaglandin biosynthetic process	2	1.50376	0.0465501	IL1B, PTGS2	133	7	19453	41.7895	1	0.23703	0.211939
GOTERM_BP_DIRECT	GO:0002933~lipid hydroxylation	2	1.50376	0.0465501	CYP1A1, CYP3A4	133	7	19453	41.7895	1	0.23703	0.211939
GOTERM_BP_DIRECT	GO:1901020~negative regulation of calcium ion transmembrane transporter activity	2	1.50376	0.0465501	CALM2, ADRA2A	133	7	19453	41.7895	1	0.23703	0.211939
GOTERM_BP_DIRECT	GO:0071494~cellular response to UV-C	2	1.50376	0.0465501	MDM2, TP53	133	7	19453	41.7895	1	0.23703	0.211939
GOTERM_BP_DIRECT	GO:0009624~response to nematode	2	1.50376	0.0465501	CYP1A1, PTGS2	133	7	19453	41.7895	1	0.23703	0.211939
GOTERM_BP_DIRECT	GO:0051173~positive regulation of nitrogen compound metabolic process	2	1.50376	0.0465501	IFNG, TNF	133	7	19453	41.7895	1	0.23703	0.211939
GOTERM_BP_DIRECT	GO:0060056~mammary gland involution	2	1.50376	0.0465501	CAV1, NFKB1	133	7	19453	41.7895	1	0.23703	0.211939
GOTERM_BP_DIRECT	GO:0034393~positive regulation of smooth muscle cell apoptotic process	2	1.50376	0.0465501	IFNG, CDKN2A	133	7	19453	41.7895	1	0.23703	0.211939
GOTERM_BP_DIRECT	GO:0051301~cell division	7	5.26316	0.0466126	CCNA2, CCND3, CCNB1, CHEK2, NUF2, CDK2, CDK1	133	383	19453	2.67322	1	0.23703	0.211939
GOTERM_BP_DIRECT	GO:1900087~positive regulation of G1/S transition of mitotic cell cycle	3	2.25564	0.0469447	CCND3, CYP1A1, AKT1	133	51	19453	8.60372	1	0.237707	0.212544
GOTERM_BP_DIRECT	GO:0007173~epidermal growth factor receptor signaling pathway	3	2.25564	0.0469447	TGFB1, EGF, AKT1	133	51	19453	8.60372	1	0.237707	0.212544
GOTERM_BP_DIRECT	GO:0043280~positive regulation of cysteine-type endopeptidase activity involved in apoptotic process	3	2.25564	0.0486107	MYC, TNF, CTSD	133	52	19453	8.43826	1	0.245623	0.219622
GOTERM_BP_DIRECT	GO:0031667~response to nutrient levels	3	2.25564	0.0502979	PON1, ACACB, TNF	133	53	19453	8.27905	1	0.253078	0.226288
GOTERM_BP_DIRECT	GO:0001837~epithelial to mesenchymal transition	3	2.25564	0.0502979	GSK3B, TGFB1, HGF	133	53	19453	8.27905	1	0.253078	0.226288
GOTERM_BP_DIRECT	GO:0042593~glucose homeostasis	4	3.00752	0.0513698	AKT1, PPARG, FGFR4, ADRA2A	133	123	19453	4.75653	1	0.254976	0.227984
GOTERM_BP_DIRECT	GO:0070371~ERK1 and ERK2 cascade	3	2.25564	0.0520061	EGF, MYC, CDK1	133	54	19453	8.12573	1	0.254976	0.227984
GOTERM_BP_DIRECT	GO:0007519~skeletal muscle tissue development	3	2.25564	0.0520061	CAV1, MAPK14, COL19A1	133	54	19453	8.12573	1	0.254976	0.227984
GOTERM_BP_DIRECT	GO:0038134~ERBB2-EGFR signaling pathway	2	1.50376	0.0530221	EGF, ERBB2	133	8	19453	36.5658	1	0.254976	0.227984
GOTERM_BP_DIRECT	GO:0034405~response to fluid shear stress	2	1.50376	0.0530221	NOS3, AKT1	133	8	19453	36.5658	1	0.254976	0.227984
GOTERM_BP_DIRECT	GO:0032873~negative regulation of stress-activated MAPK cascade	2	1.50376	0.0530221	MYC, GSTP1	133	8	19453	36.5658	1	0.254976	0.227984
GOTERM_BP_DIRECT	GO:0010757~negative regulation of plasminogen activation	2	1.50376	0.0530221	PLAU, SERPINE1	133	8	19453	36.5658	1	0.254976	0.227984
GOTERM_BP_DIRECT	GO:0061044~negative regulation of vascular wound healing	2	1.50376	0.0530221	SERPINE1, TNF	133	8	19453	36.5658	1	0.254976	0.227984
GOTERM_BP_DIRECT	GO:0040016~embryonic cleavage	2	1.50376	0.0530221	TOP2A, TOP1	133	8	19453	36.5658	1	0.254976	0.227984
GOTERM_BP_DIRECT	GO:1903071~positive regulation of ER-associated ubiquitin-dependent protein catabolic process	2	1.50376	0.0530221	CAV1, NFE2L2	133	8	19453	36.5658	1	0.254976	0.227984
GOTERM_BP_DIRECT	GO:1904037~positive regulation of epithelial cell apoptotic process	2	1.50376	0.0530221	BAX, HMOX1	133	8	19453	36.5658	1	0.254976	0.227984
GOTERM_BP_DIRECT	GO:0070293~renal absorption	2	1.50376	0.0530221	CLDN4, AKR1C3	133	8	19453	36.5658	1	0.254976	0.227984
GOTERM_BP_DIRECT	GO:0042092~type 2 immune response	2	1.50376	0.0530221	IL10, IL4	133	8	19453	36.5658	1	0.254976	0.227984
GOTERM_BP_DIRECT	GO:0007197~adenylate cyclase-inhibiting G-protein coupled acetylcholine receptor signaling pathway	2	1.50376	0.0530221	CHRM2, CHRM3	133	8	19453	36.5658	1	0.254976	0.227984
GOTERM_BP_DIRECT	GO:0007253~cytoplasmic sequestering of NF-kappaB	2	1.50376	0.0530221	IL10, NFKBIA	133	8	19453	36.5658	1	0.254976	0.227984
GOTERM_BP_DIRECT	GO:1903896~positive regulation of IRE1-mediated unfolded protein response	2	1.50376	0.0530221	BAX, BAK1	133	8	19453	36.5658	1	0.254976	0.227984
GOTERM_BP_DIRECT	GO:0006975~DNA damage induced protein phosphorylation	2	1.50376	0.0530221	CHEK2, CHEK1	133	8	19453	36.5658	1	0.254976	0.227984
GOTERM_BP_DIRECT	GO:0060736~prostate gland growth	2	1.50376	0.0530221	AR, PTEN	133	8	19453	36.5658	1	0.254976	0.227984
GOTERM_BP_DIRECT	GO:0032411~positive regulation of transporter activity	2	1.50376	0.0530221	RXRA, PON1	133	8	19453	36.5658	1	0.254976	0.227984
GOTERM_BP_DIRECT	GO:0060740~prostate gland epithelium morphogenesis	2	1.50376	0.0530221	AR, MMP2	133	8	19453	36.5658	1	0.254976	0.227984
GOTERM_BP_DIRECT	GO:0036003~positive regulation of transcription from RNA polymerase II promoter in response to stress	2	1.50376	0.0530221	TP53, NFE2L2	133	8	19453	36.5658	1	0.254976	0.227984
GOTERM_BP_DIRECT	GO:0010742~macrophage derived foam cell differentiation	2	1.50376	0.0530221	TGFB1, PPARG	133	8	19453	36.5658	1	0.254976	0.227984
GOTERM_BP_DIRECT	GO:0051592~response to calcium ion	3	2.25564	0.0537348	CAV1, KCNMA1, CALM2	133	55	19453	7.97799	1	0.257367	0.230123
GOTERM_BP_DIRECT	GO:0045786~negative regulation of cell cycle	3	2.25564	0.0537348	TGFB1, CASP3, PTGS2	133	55	19453	7.97799	1	0.257367	0.230123
GOTERM_BP_DIRECT	GO:1903078~positive regulation of protein localization to plasma membrane	3	2.25564	0.0554837	IFNG, AKT1, TNF	133	56	19453	7.83553	1	0.265212	0.237138
GOTERM_BP_DIRECT	GO:0045600~positive regulation of fat cell differentiation	3	2.25564	0.0572526	AKT1, PPARG, PPARD	133	57	19453	7.69806	1	0.271158	0.242454
GOTERM_BP_DIRECT	GO:0022900~electron transport chain	3	2.25564	0.0572526	POR, MAOB, CYP1A2	133	57	19453	7.69806	1	0.271158	0.242454
GOTERM_BP_DIRECT	GO:1901215~negative regulation of neuron death	3	2.25564	0.0590409	GSK3B, AKT1, PPARA	133	58	19453	7.56534	1	0.271158	0.242454
GOTERM_BP_DIRECT	GO:2000134~negative regulation of G1/S transition of mitotic cell cycle	3	2.25564	0.0590409	RBL1, PTEN, BCL2	133	58	19453	7.56534	1	0.271158	0.242454
GOTERM_BP_DIRECT	GO:0018108~peptidyl-tyrosine phosphorylation	3	2.25564	0.0590409	EGF, ERBB2, FGFR4	133	58	19453	7.56534	1	0.271158	0.242454
GOTERM_BP_DIRECT	GO:0009812~flavonoid metabolic process	2	1.50376	0.0594506	POR, CYP1A1	133	9	19453	32.5029	1	0.271158	0.242454
GOTERM_BP_DIRECT	GO:1901030~positive regulation of mitochondrial outer membrane permeabilization involved in apoptotic signaling pathway	2	1.50376	0.0594506	GSK3B, BAK1	133	9	19453	32.5029	1	0.271158	0.242454
GOTERM_BP_DIRECT	GO:1903140~regulation of establishment of endothelial barrier	2	1.50376	0.0594506	IL1B, TNF	133	9	19453	32.5029	1	0.271158	0.242454
GOTERM_BP_DIRECT	GO:1990314~cellular response to insulin-like growth factor stimulus	2	1.50376	0.0594506	CCNA2, TGFB1	133	9	19453	32.5029	1	0.271158	0.242454
GOTERM_BP_DIRECT	GO:0032471~negative regulation of endoplasmic reticulum calcium ion concentration	2	1.50376	0.0594506	BAX, BAK1	133	9	19453	32.5029	1	0.271158	0.242454
GOTERM_BP_DIRECT	GO:0030728~ovulation	2	1.50376	0.0594506	MYC, PTGS2	133	9	19453	32.5029	1	0.271158	0.242454
GOTERM_BP_DIRECT	GO:0006265~DNA topological change	2	1.50376	0.0594506	TOP2A, TOP1	133	9	19453	32.5029	1	0.271158	0.242454
GOTERM_BP_DIRECT	GO:1901857~positive regulation of cellular respiration	2	1.50376	0.0594506	IL4, IFNG	133	9	19453	32.5029	1	0.271158	0.242454
GOTERM_BP_DIRECT	GO:0070168~negative regulation of biomineral tissue development	2	1.50376	0.0594506	TGFB1, NOS3	133	9	19453	32.5029	1	0.271158	0.242454
GOTERM_BP_DIRECT	GO:0001542~ovulation from ovarian follicle	2	1.50376	0.0594506	NOS3, MMP2	133	9	19453	32.5029	1	0.271158	0.242454
GOTERM_BP_DIRECT	GO:0002544~chronic inflammatory response	2	1.50376	0.0594506	VCAM1, CXCL13	133	9	19453	32.5029	1	0.271158	0.242454
GOTERM_BP_DIRECT	GO:1901844~regulation of cell communication by electrical coupling involved in cardiac conduction	2	1.50376	0.0594506	CAV1, CALM2	133	9	19453	32.5029	1	0.271158	0.242454
GOTERM_BP_DIRECT	GO:0060316~positive regulation of ryanodine-sensitive calcium-release channel activity	2	1.50376	0.0594506	GSTM2, CALM2	133	9	19453	32.5029	1	0.271158	0.242454
GOTERM_BP_DIRECT	GO:0010224~response to UV-B	2	1.50376	0.0594506	BCL2, RELA	133	9	19453	32.5029	1	0.271158	0.242454
GOTERM_BP_DIRECT	GO:0050999~regulation of nitric-oxide synthase activity	2	1.50376	0.0594506	IL1A, IL1B	133	9	19453	32.5029	1	0.271158	0.242454
GOTERM_BP_DIRECT	GO:0008228~opsonization	2	1.50376	0.0594506	CRP, C3	133	9	19453	32.5029	1	0.271158	0.242454
GOTERM_BP_DIRECT	GO:0035357~peroxisome proliferator activated receptor signaling pathway	2	1.50376	0.0594506	RXRA, PPARG	133	9	19453	32.5029	1	0.271158	0.242454
GOTERM_BP_DIRECT	GO:0009308~amine metabolic process	2	1.50376	0.0594506	VCAM1, CYP1A1	133	9	19453	32.5029	1	0.271158	0.242454
GOTERM_BP_DIRECT	GO:0051122~hepoxilin biosynthetic process	2	1.50376	0.0594506	GSTM2, GSTP1	133	9	19453	32.5029	1	0.271158	0.242454
GOTERM_BP_DIRECT	GO:0032024~positive regulation of insulin secretion	3	2.25564	0.0608484	CHRM3, PRKCB, PRKACA	133	59	19453	7.43711	1	0.276258	0.247014
GOTERM_BP_DIRECT	GO:0009612~response to mechanical stimulus	3	2.25564	0.0608484	MMP2, PPARG, MPO	133	59	19453	7.43711	1	0.276258	0.247014
GOTERM_BP_DIRECT	GO:0007189~adenylate cyclase-activating G-protein coupled receptor signaling pathway	4	3.00752	0.0609155	PTGER3, ADCY2, PRKACA, ADRA2A	133	132	19453	4.43222	1	0.276258	0.247014
GOTERM_BP_DIRECT	GO:0007186~G-protein coupled receptor signaling pathway	12	9.02256	0.0642723	CHRM2, C3, CHRM3, AR, PTGER3, AKR1C3, AKT1, PPARG, CXCL13, CALM2, ADRA2A, PIK3CG	133	966	19453	1.81693	1	0.29093	0.260133
GOTERM_BP_DIRECT	GO:0042359~vitamin D metabolic process	2	1.50376	0.0658357	CYP1A1, CYP3A4	133	10	19453	29.2526	1	0.291384	0.260539
GOTERM_BP_DIRECT	GO:0060068~vagina development	2	1.50376	0.0658357	BAX, BAK1	133	10	19453	29.2526	1	0.291384	0.260539
GOTERM_BP_DIRECT	GO:0007252~I-kappaB phosphorylation	2	1.50376	0.0658357	PRDX4, MAP3K7	133	10	19453	29.2526	1	0.291384	0.260539
GOTERM_BP_DIRECT	GO:0046825~regulation of protein export from nucleus	2	1.50376	0.0658357	GSK3B, CDKN2A	133	10	19453	29.2526	1	0.291384	0.260539
GOTERM_BP_DIRECT	GO:1901522~positive regulation of transcription from RNA polymerase II promoter involved in cellular response to chemical stimulus	2	1.50376	0.0658357	JUN, RELA	133	10	19453	29.2526	1	0.291384	0.260539
GOTERM_BP_DIRECT	GO:0010042~response to manganese ion	2	1.50376	0.0658357	SOD2, PTGS2	133	10	19453	29.2526	1	0.291384	0.260539
GOTERM_BP_DIRECT	GO:0014909~smooth muscle cell migration	2	1.50376	0.0658357	PLAU, BCL2	133	10	19453	29.2526	1	0.291384	0.260539
GOTERM_BP_DIRECT	GO:0002262~myeloid cell homeostasis	2	1.50376	0.0658357	BAX, BAK1	133	10	19453	29.2526	1	0.291384	0.260539
GOTERM_BP_DIRECT	GO:0033629~negative regulation of cell adhesion mediated by integrin	2	1.50376	0.0658357	SERPINE1, CYP1B1	133	10	19453	29.2526	1	0.291384	0.260539
GOTERM_BP_DIRECT	GO:0032886~regulation of microtubule-based process	2	1.50376	0.0658357	GSK3B, ERBB2	133	10	19453	29.2526	1	0.291384	0.260539
GOTERM_BP_DIRECT	GO:0019065~receptor-mediated endocytosis of virus by host cell	2	1.50376	0.0658357	DPP4, CAV1	133	10	19453	29.2526	1	0.291384	0.260539
GOTERM_BP_DIRECT	GO:2000320~negative regulation of T-helper 17 cell differentiation	2	1.50376	0.0658357	IL4, IL2	133	10	19453	29.2526	1	0.291384	0.260539
GOTERM_BP_DIRECT	GO:0042149~cellular response to glucose starvation	3	2.25564	0.0663826	BCL2, TP53, NFE2L2	133	62	19453	7.07725	1	0.293261	0.262217
GOTERM_BP_DIRECT	GO:0050853~B cell receptor signaling pathway	4	3.00752	0.066551	NFKBIA, PRKCB, BCL2, NFKB1	133	137	19453	4.27046	1	0.293463	0.262398
GOTERM_BP_DIRECT	GO:0045087~innate immune response	9	6.76692	0.067245	CRP, PARP1, MMP3, PPARG, PI3, RELA, NFKB1, PIK3CG, NAIP	133	634	19453	2.07629	1	0.295977	0.264646
GOTERM_BP_DIRECT	GO:0001570~vasculogenesis	3	2.25564	0.0682635	TGFB1, CAV1, HAS2	133	63	19453	6.96491	1	0.299907	0.26816
GOTERM_BP_DIRECT	GO:0007399~nervous system development	7	5.26316	0.0698241	CHRM2, ACHE, CHRM3, ERBB3, PTEN, FOS, NAIP	133	425	19453	2.40904	1	0.306201	0.273787
GOTERM_BP_DIRECT	GO:0010467~gene expression	4	3.00752	0.0700456	TGFB1, AKT1, ELK1, IL2	133	140	19453	4.17895	1	0.306557	0.274106
GOTERM_BP_DIRECT	GO:0006959~humoral immune response	3	2.25564	0.0701618	IFNG, BCL2, TNF	133	64	19453	6.85609	1	0.306557	0.274106
GOTERM_BP_DIRECT	GO:0071223~cellular response to lipoteichoic acid	2	1.50376	0.0721778	MAPK14, RELA	133	11	19453	26.5933	1	0.307495	0.274945
GOTERM_BP_DIRECT	GO:1904628~cellular response to phorbol 13-acetate 12-myristate	2	1.50376	0.0721778	MYC, FOS	133	11	19453	26.5933	1	0.307495	0.274945
GOTERM_BP_DIRECT	GO:2000672~negative regulation of motor neuron apoptotic process	2	1.50376	0.0721778	ERBB3, BCL2	133	11	19453	26.5933	1	0.307495	0.274945
GOTERM_BP_DIRECT	GO:1902065~response to L-glutamate	2	1.50376	0.0721778	PCNA, TNF	133	11	19453	26.5933	1	0.307495	0.274945
GOTERM_BP_DIRECT	GO:0071313~cellular response to caffeine	2	1.50376	0.0721778	GSTM2, CHEK1	133	11	19453	26.5933	1	0.307495	0.274945
GOTERM_BP_DIRECT	GO:1900222~negative regulation of beta-amyloid clearance	2	1.50376	0.0721778	IFNG, TNF	133	11	19453	26.5933	1	0.307495	0.274945
GOTERM_BP_DIRECT	GO:0010248~establishment or maintenance of transmembrane electrochemical gradient	2	1.50376	0.0721778	BAX, BAK1	133	11	19453	26.5933	1	0.307495	0.274945
GOTERM_BP_DIRECT	GO:0048304~positive regulation of isotype switching to IgG isotypes	2	1.50376	0.0721778	IL4, IL2	133	11	19453	26.5933	1	0.307495	0.274945
GOTERM_BP_DIRECT	GO:1900015~regulation of cytokine production involved in inflammatory response	2	1.50376	0.0721778	NOS2, MAPK14	133	11	19453	26.5933	1	0.307495	0.274945
GOTERM_BP_DIRECT	GO:0046622~positive regulation of organ growth	2	1.50376	0.0721778	IGF2, AKT1	133	11	19453	26.5933	1	0.307495	0.274945
GOTERM_BP_DIRECT	GO:0031642~negative regulation of myelination	2	1.50376	0.0721778	PTEN, TNF	133	11	19453	26.5933	1	0.307495	0.274945
GOTERM_BP_DIRECT	GO:0051974~negative regulation of telomerase activity	2	1.50376	0.0721778	PPARG, TP53	133	11	19453	26.5933	1	0.307495	0.274945
GOTERM_BP_DIRECT	GO:0072577~endothelial cell apoptotic process	2	1.50376	0.0721778	IL10, TNF	133	11	19453	26.5933	1	0.307495	0.274945
GOTERM_BP_DIRECT	GO:0060315~negative regulation of ryanodine-sensitive calcium-release channel activity	2	1.50376	0.0721778	GSTM2, CALM2	133	11	19453	26.5933	1	0.307495	0.274945
GOTERM_BP_DIRECT	GO:0007275~multicellular organism development	4	3.00752	0.0748888	ERBB3, ERBB2, PCOLCE, FGFR4	133	144	19453	4.06287	1	0.318477	0.284764
GOTERM_BP_DIRECT	GO:0045668~negative regulation of osteoblast differentiation	3	2.25564	0.075959	VEGFC, PPARG, TNF	133	67	19453	6.5491	1	0.322455	0.28832
GOTERM_BP_DIRECT	GO:0010595~positive regulation of endothelial cell migration	3	2.25564	0.0779243	EGF, AKT1, PIK3CG	133	68	19453	6.45279	1	0.322824	0.28865
GOTERM_BP_DIRECT	GO:0042102~positive regulation of T cell proliferation	3	2.25564	0.0779243	IL4, VCAM1, IL1B	133	68	19453	6.45279	1	0.322824	0.28865
GOTERM_BP_DIRECT	GO:0051898~negative regulation of protein kinase B signaling	3	2.25564	0.0779243	PTEN, PPARA, XDH	133	68	19453	6.45279	1	0.322824	0.28865
GOTERM_BP_DIRECT	GO:0046902~regulation of mitochondrial membrane permeability	2	1.50376	0.0784772	BCL2, BAK1	133	12	19453	24.3772	1	0.322824	0.28865
GOTERM_BP_DIRECT	GO:2001020~regulation of response to DNA damage stimulus	2	1.50376	0.0784772	CASP9, MCL1	133	12	19453	24.3772	1	0.322824	0.28865
GOTERM_BP_DIRECT	GO:1905461~positive regulation of vascular associated smooth muscle cell apoptotic process	2	1.50376	0.0784772	PPARG, SOD2	133	12	19453	24.3772	1	0.322824	0.28865
GOTERM_BP_DIRECT	GO:1903800~positive regulation of production of miRNAs involved in gene silencing by miRNA	2	1.50376	0.0784772	TGFB1, TP53	133	12	19453	24.3772	1	0.322824	0.28865
GOTERM_BP_DIRECT	GO:0002903~negative regulation of B cell apoptotic process	2	1.50376	0.0784772	BCL2, IL2	133	12	19453	24.3772	1	0.322824	0.28865
GOTERM_BP_DIRECT	GO:0010918~positive regulation of mitochondrial membrane potential	2	1.50376	0.0784772	MYC, AKT1	133	12	19453	24.3772	1	0.322824	0.28865
GOTERM_BP_DIRECT	GO:2000343~positive regulation of chemokine (C-X-C motif) ligand 2 production	2	1.50376	0.0784772	TGFB1, TNF	133	12	19453	24.3772	1	0.322824	0.28865
GOTERM_BP_DIRECT	GO:0016572~histone phosphorylation	2	1.50376	0.0784772	CCNA2, CDK2	133	12	19453	24.3772	1	0.322824	0.28865
GOTERM_BP_DIRECT	GO:0007406~negative regulation of neuroblast proliferation	2	1.50376	0.0784772	TGFB1, TP53	133	12	19453	24.3772	1	0.322824	0.28865
GOTERM_BP_DIRECT	GO:0071374~cellular response to parathyroid hormone stimulus	2	1.50376	0.0784772	FOS, PRKACA	133	12	19453	24.3772	1	0.322824	0.28865
GOTERM_BP_DIRECT	GO:0051549~positive regulation of keratinocyte migration	2	1.50376	0.0784772	HAS2, MMP9	133	12	19453	24.3772	1	0.322824	0.28865
GOTERM_BP_DIRECT	GO:0010226~response to lithium ion	2	1.50376	0.0784772	PTGS2, NFE2L2	133	12	19453	24.3772	1	0.322824	0.28865
GOTERM_BP_DIRECT	GO:0032308~positive regulation of prostaglandin secretion	2	1.50376	0.0784772	IL1A, IL1B	133	12	19453	24.3772	1	0.322824	0.28865
GOTERM_BP_DIRECT	GO:0006983~ER overload response	2	1.50376	0.0784772	GSK3B, TP53	133	12	19453	24.3772	1	0.322824	0.28865
GOTERM_BP_DIRECT	GO:2000273~positive regulation of receptor activity	2	1.50376	0.0784772	IL10, IFNG	133	12	19453	24.3772	1	0.322824	0.28865
GOTERM_BP_DIRECT	GO:0060395~SMAD protein signal transduction	3	2.25564	0.0819025	JUN, TGFB1, FOS	133	70	19453	6.26842	1	0.336335	0.300731
GOTERM_BP_DIRECT	GO:0032715~negative regulation of interleukin-6 production	3	2.25564	0.0839148	IL10, HGF, TNF	133	71	19453	6.18013	1	0.341508	0.305357
GOTERM_BP_DIRECT	GO:0010269~response to selenium ion	2	1.50376	0.0847341	MAOB, SOD2	133	13	19453	22.502	1	0.341508	0.305357
GOTERM_BP_DIRECT	GO:0014912~negative regulation of smooth muscle cell migration	2	1.50376	0.0847341	SERPINE1, PPARD	133	13	19453	22.502	1	0.341508	0.305357
GOTERM_BP_DIRECT	GO:0033628~regulation of cell adhesion mediated by integrin	2	1.50376	0.0847341	PLAU, PIK3CG	133	13	19453	22.502	1	0.341508	0.305357
GOTERM_BP_DIRECT	GO:0045741~positive regulation of epidermal growth factor-activated receptor activity	2	1.50376	0.0847341	EGF, ADRA2A	133	13	19453	22.502	1	0.341508	0.305357
GOTERM_BP_DIRECT	GO:0034138~toll-like receptor 3 signaling pathway	2	1.50376	0.0847341	TNF, MAP3K7	133	13	19453	22.502	1	0.341508	0.305357
GOTERM_BP_DIRECT	GO:0038066~p38MAPK cascade	2	1.50376	0.0847341	MAPK14, MAP3K7	133	13	19453	22.502	1	0.341508	0.305357
GOTERM_BP_DIRECT	GO:0051450~myoblast proliferation	2	1.50376	0.0847341	HGF, FOS	133	13	19453	22.502	1	0.341508	0.305357
GOTERM_BP_DIRECT	GO:0060100~positive regulation of phagocytosis, engulfment	2	1.50376	0.0847341	C3, PPARG	133	13	19453	22.502	1	0.341508	0.305357
GOTERM_BP_DIRECT	GO:0051918~negative regulation of fibrinolysis	2	1.50376	0.0847341	PLAU, SERPINE1	133	13	19453	22.502	1	0.341508	0.305357
GOTERM_BP_DIRECT	GO:0033148~positive regulation of intracellular estrogen receptor signaling pathway	2	1.50376	0.0847341	AR, PARP1	133	13	19453	22.502	1	0.341508	0.305357
GOTERM_BP_DIRECT	GO:0033674~positive regulation of kinase activity	3	2.25564	0.0859421	ERBB3, ERBB2, FGFR4	133	72	19453	6.0943	1	0.344634	0.308151
GOTERM_BP_DIRECT	GO:0009791~post-embryonic development	3	2.25564	0.0859421	CYP1A2, BCL2, SOD2	133	72	19453	6.0943	1	0.344634	0.308151
GOTERM_BP_DIRECT	GO:0050679~positive regulation of epithelial cell proliferation	3	2.25564	0.0859421	TGFB1, MYC, ERBB2	133	72	19453	6.0943	1	0.344634	0.308151
GOTERM_BP_DIRECT	GO:0007204~positive regulation of cytosolic calcium ion concentration	4	3.00752	0.0887011	PTGER3, CXCL13, IL2, PIK3CG	133	155	19453	3.77453	1	0.355101	0.317511
GOTERM_BP_DIRECT	GO:0006302~double-strand break repair	3	2.25564	0.0900408	PARP1, CHEK2, TP53	133	74	19453	5.92959	1	0.356926	0.319142
GOTERM_BP_DIRECT	GO:0031571~mitotic G1 DNA damage checkpoint	2	1.50376	0.0909489	CDK2, TP53	133	14	19453	20.8947	1	0.356926	0.319142
GOTERM_BP_DIRECT	GO:0070417~cellular response to cold	2	1.50376	0.0909489	NFKBIA, PRKACA	133	14	19453	20.8947	1	0.356926	0.319142
GOTERM_BP_DIRECT	GO:0048011~neurotrophin TRK receptor signaling pathway	2	1.50376	0.0909489	CASP3, RAF1	133	14	19453	20.8947	1	0.356926	0.319142
GOTERM_BP_DIRECT	GO:0060411~cardiac septum morphogenesis	2	1.50376	0.0909489	MDM2, TP53	133	14	19453	20.8947	1	0.356926	0.319142
GOTERM_BP_DIRECT	GO:0046685~response to arsenic-containing substance	2	1.50376	0.0909489	CYP1A1, CYP1B1	133	14	19453	20.8947	1	0.356926	0.319142
GOTERM_BP_DIRECT	GO:0010389~regulation of G2/M transition of mitotic cell cycle	2	1.50376	0.0909489	CDKN2A, CDK2	133	14	19453	20.8947	1	0.356926	0.319142
GOTERM_BP_DIRECT	GO:1904996~positive regulation of leukocyte adhesion to vascular endothelial cell	2	1.50376	0.0909489	TNF, RELA	133	14	19453	20.8947	1	0.356926	0.319142
GOTERM_BP_DIRECT	GO:0086064~cell communication by electrical coupling involved in cardiac conduction	2	1.50376	0.0909489	GJA1, PRKACA	133	14	19453	20.8947	1	0.356926	0.319142
GOTERM_BP_DIRECT	GO:0032479~regulation of type I interferon production	2	1.50376	0.0909489	RELA, NFKB1	133	14	19453	20.8947	1	0.356926	0.319142
GOTERM_BP_DIRECT	GO:0046688~response to copper ion	2	1.50376	0.0909489	IL1A, CDK1	133	14	19453	20.8947	1	0.356926	0.319142
GOTERM_BP_DIRECT	GO:0085029~extracellular matrix assembly	2	1.50376	0.0909489	TGFB1, HAS2	133	14	19453	20.8947	1	0.356926	0.319142
GOTERM_BP_DIRECT	GO:0043687~post-translational protein modification	3	2.25564	0.0941962	CCNA2, PRKCB, CDK2	133	76	19453	5.77355	1	0.369064	0.329996
GOTERM_BP_DIRECT	GO:0045725~positive regulation of glycogen biosynthetic process	2	1.50376	0.0971218	IGF2, AKT1	133	15	19453	19.5018	1	0.373786	0.334218
GOTERM_BP_DIRECT	GO:0010763~positive regulation of fibroblast migration	2	1.50376	0.0971218	TGFB1, AKT1	133	15	19453	19.5018	1	0.373786	0.334218
GOTERM_BP_DIRECT	GO:0003376~sphingosine-1-phosphate signaling pathway	2	1.50376	0.0971218	AKT1, PIK3CG	133	15	19453	19.5018	1	0.373786	0.334218
GOTERM_BP_DIRECT	GO:0032966~negative regulation of collagen biosynthetic process	2	1.50376	0.0971218	PPARG, PPARD	133	15	19453	19.5018	1	0.373786	0.334218
GOTERM_BP_DIRECT	GO:0002281~macrophage activation involved in immune response	2	1.50376	0.0971218	IFNG, TNF	133	15	19453	19.5018	1	0.373786	0.334218
GOTERM_BP_DIRECT	GO:0021854~hypothalamus development	2	1.50376	0.0971218	MYC, BAX	133	15	19453	19.5018	1	0.373786	0.334218
GOTERM_BP_DIRECT	GO:0006978~DNA damage response, signal transduction by p53 class mediator resulting in transcription of p21 class mediator	2	1.50376	0.0971218	CHEK2, TP53	133	15	19453	19.5018	1	0.373786	0.334218
GOTERM_BP_DIRECT	GO:2000679~positive regulation of transcription regulatory region DNA binding	2	1.50376	0.0971218	TGFB1, PARP1	133	15	19453	19.5018	1	0.373786	0.334218
GOTERM_BP_DIRECT	GO:0007213~G-protein coupled acetylcholine receptor signaling pathway	2	1.50376	0.0971218	CHRM2, CHRM3	133	15	19453	19.5018	1	0.373786	0.334218
GOTERM_BP_DIRECT	GO:0070166~enamel mineralization	2	1.50376	0.0971218	TGFB1, PPARA	133	15	19453	19.5018	1	0.373786	0.334218
GOTERM_BP_DIRECT	GO:0051149~positive regulation of muscle cell differentiation	2	1.50376	0.0971218	MDM2, MAPK14	133	15	19453	19.5018	1	0.373786	0.334218
GOTERM_BP_DIRECT	GO:0006813~potassium ion transport	3	2.25564	0.0984061	NOS3, KCNMA1, CDK2	133	78	19453	5.62551	1	0.37812	0.338093
GOTERM_CC_DIRECT	GO:0005615~extracellular space	40	30.0752	9.95432e-11	CRP, ACHE, GSTP1, PON1, SERPINE1, HSPB1, CXCL13, MPO, TNF, COL19A1, C3, CASP7, ERBB3, PLAU, CHEK1, SPP1, HMOX1, PI3, IGFBP6, XDH, CTSD, IL10, TGFB1, VCAM1, F10, MMP1, EGF, HGF, MMP2, MMP3, IGF2, VEGFC, PCOLCE, MMP9, F3, IL2, IL4, IL1A, IFNG, IL1B	133	1990	20647	3.12041	2.75735e-08	2.75735e-08	2.39899e-08
GOTERM_CC_DIRECT	GO:0005576~extracellular region	40	30.0752	2.07172e-09	CRP, ACHE, GSTP1, PON1, SERPINE1, PTEN, CXCL13, MPO, TNF, COL19A1, DPP4, C3, PRDX4, PLAU, SPP1, OLR1, PI3, IGFBP6, CTSD, IL10, TGFB1, F10, MMP1, EGF, HGF, MMP2, MMP3, IGF2, VEGFC, PCOLCE, MAPK14, MMP9, IL2, NFKB1, IL4, IL1A, IFNG, IL1B, FGFR4, CALM2	133	2208	20647	2.81233	5.73866e-07	2.86933e-07	2.49642e-07
GOTERM_CC_DIRECT	GO:0005654~nucleoplasm	54	40.6015	5.21879e-08	TOP2A, GSK3B, PTEN, MPO, ELK1, NR3C2, CCND3, GJA1, CASP7, CASP8, MYC, CHEK2, CASP3, NUF2, CHEK1, AKT1, OLR1, PRKACA, PARP1, PRKCB, FOS, CCNA2, AR, RBL1, PPARG, TOP1, PPARA, TP53, PPARD, PCNA, ADH1C, XIAP, RELA, CCNB1, RXRA, ERBB2, E2F1, E2F2, HMOX1, MCL1, RUNX1T1, JUN, NOS2, CDKN2A, MAPK14, ESR2, NFKB1, NFKBIA, CDK2, BCL2, CDK1, MDM2, CALM2, NFE2L2	133	4076	20647	2.05667	1.44559e-05	4.81868e-06	4.19242e-06
GOTERM_CC_DIRECT	GO:0005739~mitochondrion	29	21.8045	1.3911e-07	GSK3B, MAOB, GSTP1, ELK1, ACACB, HK2, CASP9, GJA1, CASP8, RXRA, MYC, CYP1B1, AKT1, BAK1, PRKACA, MCL1, PARP1, CDKN2A, MMP2, MAPK14, SOD2, ESR2, NFKB1, POR, BCL2, CDK1, BAX, RAF1, TP53	133	1466	20647	3.07093	3.85326e-05	9.63333e-06	8.38135e-06
GOTERM_CC_DIRECT	GO:0032991~macromolecular complex	19	14.2857	4.91075e-07	TOP2A, PARP1, CDKN2A, CAV1, PTGS2, TNF, CASP9, C3, AR, CASP7, CASP8, MYC, CHEK1, MDM2, E2F1, BCL2, AKT1, CALM2, TP53	133	697	20647	4.23181	0.000136019	2.72056e-05	2.36698e-05
GOTERM_CC_DIRECT	GO:0005634~nucleus	67	50.3759	6.01239e-07	CDKN1C, TOP2A, ACHE, GSK3B, PTEN, HSPB1, MPO, ELK1, NR3C2, CASP9, CCND3, GJA1, CASP7, RASSF3, MYC, CHEK2, CASP3, CHEK1, CYP1B1, AKT1, PRKACA, MAP3K7, PARP1, PRKCB, MMP2, MMP3, FOS, CCNA2, IL1A, AR, PPARG, TOP1, RAF1, PPARA, TP53, PPARD, PCNA, GSTP1, XIAP, ACACB, RELA, CCNB1, PRDX4, RXRA, ERBB2, E2F1, E2F2, HMOX1, MCL1, RUNX1T1, JUN, TGFB1, NOS2, CDKN2A, NOS3, AKR1C3, MAPK14, ESR2, NFKB1, NFKBIA, …	133	6100	20647	1.7051	0.000166529	2.77572e-05	2.41498e-05
GOTERM_CC_DIRECT	GO:0005829~cytosol	63	47.3684	9.70263e-07	GSK3B, PTEN, HSPB1, PYGM, HK2, PIK3CG, NR3C2, CASP9, CCND3, GJA1, CASP7, CASP8, RASSF3, CA2, CASP3, NUF2, CHEK1, AKT1, PRKACA, MAP3K7, PARP1, PRKCB, AHSA1, FOS, CCNA2, IL1A, AR, POR, IL1B, PPARG, RAF1, TP53, ADH1C, GSTP1, ODC1, XIAP, ACACB, RELA, CCNB1, PRDX4, RXRA, ERBB2, HMOX1, PI3, BAK1, XDH, MCL1, GSTM2, NOS2, CDKN2A, NOS3, AKR1C3, MAPK14, NFKB1, NFKBIA, CDK2, GSTA1, BCL2, CDK1, MDM2, BAX, CA…	133	5627	20647	1.73808	0.000268727	3.83947e-05	3.34048e-05
GOTERM_CC_DIRECT	GO:0000307~cyclin-dependent protein kinase holoenzyme complex	6	4.51128	9.849e-06	CCNA2, CCND3, CCNB1, PCNA, CDK2, CDK1	133	45	20647	20.6987	0.00272447	0.000326252	0.000283851
GOTERM_CC_DIRECT	GO:0005741~mitochondrial outer membrane	10	7.5188	1.06002e-05	CASP8, MAOB, BCL2, BAX, HMOX1, BAK1, RAF1, ACACB, HK2, MCL1	133	216	20647	7.18706	0.00293198	0.000326252	0.000283851
GOTERM_CC_DIRECT	GO:0008303~caspase complex	4	3.00752	1.39725e-05	CASP9, CASP7, CASP8, CASP3	133	8	20647	77.6203	0.00386293	0.000387038	0.000336737
GOTERM_CC_DIRECT	GO:0000785~chromatin	21	15.7895	2.62429e-05	JUN, PCNA, PARP1, FOS, ELK1, RELA, ESR2, NFKB1, NR3C2, AR, RBL1, RXRA, MYC, CHEK1, E2F1, E2F2, PPARG, PPARA, TP53, NFE2L2, PPARD	133	1112	20647	2.9317	0.00724302	0.000660844	0.000574958
GOTERM_CC_DIRECT	GO:0031093~platelet alpha granule lumen	6	4.51128	7.47122e-05	TGFB1, EGF, HGF, SERPINE1, IGF2, VEGFC	133	68	20647	13.6977	0.0204834	0.00172461	0.00150047
GOTERM_CC_DIRECT	GO:0005737~cytoplasm	58	43.609	0.000120892	CDKN1C, TOP2A, GSK3B, PTEN, HSPB1, PYGM, PIK3CG, CASP9, CCND3, GJA1, CASP7, CASP8, RASSF3, CA2, CHEK2, CASP3, CHEK1, AKT1, PRKACA, MAP3K7, PRKCB, MMP3, ADRA2A, CCNA2, AR, PPARG, RAF1, TP53, NAIP, GSTP1, ODC1, XIAP, ADCY2, CYP3A4, PTGS2, RELA, PTGS1, CCNB1, CYP2B6, PRDX4, E2F1, MCL1, GSTM2, TGFB1, NOS2, CDKN2A, NOS3, AKR1C3, MAPK14, NFKB1, NFKBIA, CDK2, BCL2, CDK1, MDM2, BAX, CALM2, NFE2L2	133	5771	20647	1.56021	0.0329346	0.00257593	0.00224115
GOTERM_CC_DIRECT	GO:0005667~transcription factor complex	9	6.76692	0.000133116	JUN, RXRA, RBL1, PARP1, CDK2, E2F2, FOS, TP53, RELA	133	234	20647	5.97079	0.0362039	0.00263379	0.00229149
GOTERM_CC_DIRECT	GO:0090575~RNA polymerase II transcription factor complex	7	5.26316	0.000146802	JUN, RXRA, E2F1, E2F2, PPARG, FOS, NFE2L2	133	124	20647	8.76358	0.0398513	0.00271094	0.00235862
GOTERM_CC_DIRECT	GO:0045121~membrane raft	9	6.76692	0.000203552	DPP4, GJA1, CASP8, CASP3, CAV1, OLR1, ADCY2, TNF, CTSD	133	249	20647	5.61111	0.0548291	0.00352399	0.003066
GOTERM_CC_DIRECT	GO:0005813~centrosome	13	9.77444	0.000330967	GSK3B, PCNA, PRKCB, HK2, CCNB1, CHEK1, CDK2, E2F1, CDK1, PRKACA, CALM2, TP53, NFE2L2	133	576	20647	3.50369	0.0876149	0.00539282	0.00469195
GOTERM_CC_DIRECT	GO:1905370~serine-type endopeptidase complex	4	3.00752	0.000359862	C3, F10, PLAU, F3	133	22	20647	28.2256	0.0948908	0.00553787	0.00481815
GOTERM_CC_DIRECT	GO:0043235~receptor complex	8	6.01504	0.00061908	RXRA, ERBB3, ERBB2, OLR1, PPARG, FGFR4, ADRA2A, NR3C2	133	225	20647	5.51967	0.157632	0.00902553	0.00785254
GOTERM_CC_DIRECT	GO:0070062~extracellular exosome	28	21.0526	0.000855791	PCNA, GSTP1, PON1, SERPINE1, HSPB1, PYGM, MPO, PTGS1, DPP4, C3, PRDX4, PLAU, CA2, SPP1, PRKACA, CTSD, GSTM2, VCAM1, PRKCB, EGF, AKR1C3, AHSA1, PCOLCE, SOD2, MMP9, GSTA1, CDK1, BAX	133	2240	20647	1.94051	0.211131	0.0115075	0.0100119
GOTERM_CC_DIRECT	GO:0005789~endoplasmic reticulum membrane	18	13.5338	0.000896543	CHRM3, CAV1, PON1, CYP3A4, PTGS2, PTGS1, NR3C2, POR, GJA1, CYP2B6, CYP1A2, CYP1A1, BCL2, CDK1, BAX, CYP1B1, HMOX1, HAS2	133	1132	20647	2.46849	0.219994	0.0115075	0.0100119
GOTERM_CC_DIRECT	GO:0043209~myelin sheath	4	3.00752	0.000913951	CA2, ERBB2, BCL2, CALM2	133	30	20647	20.6987	0.22375	0.0115075	0.0100119
GOTERM_CC_DIRECT	GO:0097136~Bcl-2 family protein complex	3	2.25564	0.00110755	BAX, BAK1, MCL1	133	8	20647	58.2152	0.26432	0.0133387	0.0116052
GOTERM_CC_DIRECT	GO:0005901~caveola	5	3.7594	0.00136587	NOS3, CAV1, KCNMA1, HMOX1, PTGS2	133	75	20647	10.3494	0.315184	0.0157644	0.0137156
GOTERM_CC_DIRECT	GO:0032993~protein-DNA complex	4	3.00752	0.002615	PARP1, FOS, TOP1, NFE2L2	133	43	20647	14.441	0.515823	0.0289742	0.0252086
GOTERM_CC_DIRECT	GO:0046930~pore complex	3	2.25564	0.00403331	BCL2, BAX, BAK1	133	15	20647	31.0481	0.673552	0.0429702	0.0373856
GOTERM_CC_DIRECT	GO:0005886~plasma membrane	50	37.594	0.0043977	CHRM2, ACHE, CHRM3, GSK3B, SERPINE1, ICAM2, PTEN, HSPB1, TNF, HK2, PIK3CG, GJA1, RASSF3, PLAU, CA2, AKT1, OLR1, PRKACA, MAP3K7, PRKCB, MMP2, F3, ADRA2A, IL1A, AR, CLDN4, KCNMA1, RAF1, ADH1C, PTGER3, ADCY2, DPP4, C3, ERBB3, ERBB2, HAS2, JUN, TGFB1, VCAM1, NOS2, F10, EGF, NOS3, CAV1, GABRA3, NFKBIA, MDM2, FGFR4, CALM2, NFE2L2	133	5455	20647	1.42292	0.70502	0.0451171	0.0392535
GOTERM_CC_DIRECT	GO:0001673~male germ cell nucleus	4	3.00752	0.00473889	TOP2A, PCNA, CDK2, TOP1	133	53	20647	11.7163	0.731738	0.0468812	0.0407883
GOTERM_CC_DIRECT	GO:0000781~chromosome, telomeric region	6	4.51128	0.00537927	PCNA, PARP1, CHEK2, CHEK1, CDK2, CDK1	133	175	20647	5.32253	0.775545	0.0502621	0.0437299
GOTERM_CC_DIRECT	GO:0043231~intracellular membrane-bounded organelle	15	11.2782	0.00544355	PON1, CYP3A4, MPO, ESR2, HK2, PTGS1, POR, GJA1, CYP2B6, CYP1A2, CHEK1, CYP1A1, CYP1B1, OLR1, PPARG	133	1014	20647	2.29646	0.779528	0.0502621	0.0437299
GOTERM_CC_DIRECT	GO:0031012~extracellular matrix	7	5.26316	0.00647165	TGFB1, MMP1, MMP2, MMP3, PI3, MMP9, COL19A1	133	259	20647	4.19569	0.834449	0.0569947	0.0495874
GOTERM_CC_DIRECT	GO:0034774~secretory granule lumen	5	3.7594	0.00658422	C3, PRDX4, GSTP1, MAPK14, NFKB1	133	116	20647	6.69141	0.839564	0.0569947	0.0495874
GOTERM_CC_DIRECT	GO:1904813~ficolin-1-rich granule lumen	5	3.7594	0.00852978	PRDX4, GSTP1, MAPK14, CTSD, MMP9	133	125	20647	6.20962	0.906789	0.0715985	0.0622933
GOTERM_CC_DIRECT	GO:0009925~basal plasma membrane	4	3.00752	0.00984365	CHRM3, CLDN4, ERBB3, ERBB2	133	69	20647	8.99946	0.935443	0.0801968	0.0697741
GOTERM_CC_DIRECT	GO:0005887~integral component of plasma membrane	18	13.5338	0.0112814	CHRM2, CHRM3, VCAM1, CAV1, PTGER3, GABRA3, ICAM2, ADCY2, F3, TNF, ADRA2A, GJA1, CLDN4, ERBB3, ERBB2, OLR1, HAS2, FGFR4	133	1453	20647	1.92315	0.956835	0.0882646	0.0767934
GOTERM_CC_DIRECT	GO:0097122~cyclin A2-CDK1 complex	2	1.50376	0.0127458	CCNA2, CDK1	133	2	20647	155.241	0.971369	0.0882646	0.0767934
GOTERM_CC_DIRECT	GO:0038143~ERBB3:ERBB2 complex	2	1.50376	0.0127458	ERBB3, ERBB2	133	2	20647	155.241	0.971369	0.0882646	0.0767934
GOTERM_CC_DIRECT	GO:0033256~I-kappaB/NF-kappaB complex	2	1.50376	0.0127458	NFKBIA, NFKB1	133	2	20647	155.241	0.971369	0.0882646	0.0767934
GOTERM_CC_DIRECT	GO:0097125~cyclin B1-CDK1 complex	2	1.50376	0.0127458	CCNB1, CDK1	133	2	20647	155.241	0.971369	0.0882646	0.0767934
GOTERM_CC_DIRECT	GO:0097145~BAK complex	2	1.50376	0.0127458	BAX, BAK1	133	2	20647	155.241	0.971369	0.0882646	0.0767934
GOTERM_CC_DIRECT	GO:0005657~replication fork	3	2.25564	0.0156974	PCNA, CHEK1, TP53	133	30	20647	15.5241	0.987508	0.105714	0.0919749
GOTERM_CC_DIRECT	GO:0016324~apical plasma membrane	8	6.01504	0.0160288	DPP4, CLDN4, GJA1, ERBB3, CAV1, ERBB2, KCNMA1, PTEN	133	408	20647	3.04393	0.988621	0.105714	0.0919749
GOTERM_CC_DIRECT	GO:0005783~endoplasmic reticulum	15	11.2782	0.0181912	VCAM1, F10, CAV1, AHSA1, FOS, PTGS2, POR, GJA1, PRDX4, BCL2, BAX, HMOX1, BAK1, FGFR4, TP53	133	1175	20647	1.98179	0.993813	0.117185	0.101955
GOTERM_CC_DIRECT	GO:0031233~intrinsic component of external side of plasma membrane	2	1.50376	0.0253304	F10, F3	133	4	20647	77.6203	0.999181	0.155922	0.135658
GOTERM_CC_DIRECT	GO:0035189~Rb-E2F complex	2	1.50376	0.0253304	E2F1, E2F2	133	4	20647	77.6203	0.999181	0.155922	0.135658
GOTERM_CC_DIRECT	GO:0016323~basolateral plasma membrane	6	4.51128	0.0263162	CHRM3, ERBB3, CAV1, ERBB2, ADRA2A, NAIP	133	261	20647	3.56875	0.999381	0.158469	0.137874
GOTERM_CC_DIRECT	GO:0097180~serine protease inhibitor complex	2	1.50376	0.0315628	PLAU, SERPINE1	133	5	20647	62.0962	0.999861	0.182129	0.158459
GOTERM_CC_DIRECT	GO:0035976~transcription factor AP-1 complex	2	1.50376	0.0315628	JUN, FOS	133	5	20647	62.0962	0.999861	0.182129	0.158459
GOTERM_CC_DIRECT	GO:0005876~spindle microtubule	3	2.25564	0.0322177	CDK1, XIAP, CALM2	133	44	20647	10.5846	0.999885	0.182129	0.158459
GOTERM_CC_DIRECT	GO:0071159~NF-kappaB complex	2	1.50376	0.0377557	RELA, NFKB1	133	6	20647	51.7469	0.999977	0.201299	0.175137
GOTERM_CC_DIRECT	GO:0097124~cyclin A2-CDK2 complex	2	1.50376	0.0377557	CCNA2, CDK2	133	6	20647	51.7469	0.999977	0.201299	0.175137
GOTERM_CC_DIRECT	GO:0016529~sarcoplasmic reticulum	3	2.25564	0.0377889	GSTM2, XDH, HK2	133	48	20647	9.70254	0.999977	0.201299	0.175137
GOTERM_CC_DIRECT	GO:0031264~death-inducing signaling complex	2	1.50376	0.0439093	CASP8, CASP3	133	7	20647	44.3545	0.999996	0.229488	0.199663
GOTERM_CC_DIRECT	GO:0005635~nuclear envelope	5	3.7594	0.0453512	PARP1, MYC, PTGER3, CDK2, BAX	133	209	20647	3.71389	0.999997	0.232635	0.202401
GOTERM_CC_DIRECT	GO:0000228~nuclear chromosome	3	2.25564	0.0483403	TOP2A, JUN, TOP1	133	55	20647	8.46767	0.999999	0.243459	0.211818
GOTERM_CC_DIRECT	GO:0098978~glutamatergic synapse	7	5.26316	0.056102	CHRM2, GSK3B, AKT1, MAPK14, PRKACA, RELA, ADRA2A	133	426	20647	2.5509	1	0.277505	0.241439
GOTERM_CC_DIRECT	GO:0016020~membrane	32	24.0602	0.0588906	CHRM2, ACHE, PTGER3, ICAM2, ADCY2, CYP3A4, TNF, HK2, PIK3CG, DPP4, CCND3, CCNB1, ERBB2, NUF2, AKT1, HMOX1, OLR1, PRKACA, MCL1, VCAM1, PARP1, HGF, CAV1, VEGFC, FOS, F3, POR, KCNMA1, BCL2, CDK1, BAX, CALM2	133	3677	20647	1.35102	1	0.282915	0.246146
GOTERM_CC_DIRECT	GO:0017053~transcriptional repressor complex	3	2.25564	0.0598202	JUN, MDM2, TP53	133	62	20647	7.51164	1	0.282915	0.246146
GOTERM_CC_DIRECT	GO:0009986~cell surface	9	6.76692	0.0602598	DPP4, C3, IL1A, ACHE, TGFB1, VCAM1, PLAU, TNF, F3	133	657	20647	2.12658	1	0.282915	0.246146
GOTERM_CC_DIRECT	GO:0005794~Golgi apparatus	13	9.77444	0.0626216	ACHE, VCAM1, NOS3, CAV1, PTGS1, GJA1, CHEK2, SPP1, HAS2, IGFBP6, RAF1, FGFR4, NFE2L2	133	1144	20647	1.7641	1	0.289103	0.25153
GOTERM_CC_DIRECT	GO:0043679~axon terminus	3	2.25564	0.066758	CHRM2, ELK1, ADRA2A	133	66	20647	7.05639	1	0.303147	0.263749
GOTERM_CC_DIRECT	GO:0005902~microvillus	3	2.25564	0.0739484	TGFB1, VCAM1, ICAM2	133	70	20647	6.65317	1	0.330382	0.287445
GOTERM_CC_DIRECT	GO:0030666~endocytic vesicle membrane	3	2.25564	0.0813743	NOS3, CAV1, MDM2	133	74	20647	6.29354	1	0.357788	0.311289
GOTERM_CC_DIRECT	GO:0016328~lateral plasma membrane	3	2.25564	0.0890193	CLDN4, GJA1, ERBB3	133	78	20647	5.97079	1	0.385286	0.335213
GOTERM_CC_DIRECT	GO:0043005~neuron projection	6	4.51128	0.0922628	CASP8, GABRA3, PTEN, FOS, PTGS2, PTGS1	133	374	20647	2.49049	1	0.393181	0.342082
GOTERM_CC_DIRECT	GO:0043025~neuronal cell body	6	4.51128	0.0987027	CHRM2, TGFB1, CASP3, ELK1, TNF, ADRA2A	133	382	20647	2.43833	1	0.414252	0.360414
GOTERM_MF_DIRECT	GO:0019899~enzyme binding	27	20.3008	1.42732e-18	TOP2A, PCNA, PTEN, CYP3A4, PTGS2, RELA, RXRA, AKT1, HMOX1, GSTM2, JUN, TGFB1, PARP1, CAV1, MAPK14, SOD2, ESR2, NFKB1, NFKBIA, AR, POR, CYP1A2, CYP1A1, MDM2, PPARG, RAF1, TP53	133	386	18967	9.97524	7.03668e-16	7.03668e-16	6.15174e-16
GOTERM_MF_DIRECT	GO:0042802~identical protein binding	44	33.0827	4.50177e-14	CRP, PCNA, MAOB, PTEN, XIAP, HSPB1, TNF, ACACB, RELA, PIK3CG, CASP9, DPP4, CASP8, RXRA, PRDX4, ERBB3, RASSF3, CHEK2, ERBB2, AKT1, HMOX1, HAS2, OLR1, BAK1, IGFBP6, MAP3K7, JUN, TGFB1, PARP1, HGF, CAV1, FOS, SOD2, MMP9, NFKB1, NFKBIA, CLDN4, KCNMA1, BCL2, MDM2, BAX, PPARG, RAF1, TP53	133	1736	18967	3.61451	2.21673e-11	1.10969e-11	9.70132e-12
GOTERM_MF_DIRECT	GO:0005515~protein binding	119	89.4737	1.21494e-09	CHRM3, SERPINE1, MPO, ELK1, TNF, NR3C2, CCND3, GJA1, RASSF3, PLAU, MYC, CHEK2, CHEK1, CYP1B1, AKT1, PRKACA, MAP3K7, PRKCB, HGF, PCOLCE, AR, POR, CLDN4, RAF1, TP53, NAIP, MAOB, ACACB, DPP4, C3, CCNB1, PRDX4, HMOX1, IGFBP6, MCL1, GSTM2, JUN, TGFB1, CAV1, IGF2, ESR2, NFKB1, IL2, NFKBIA, IL4, CYP1A2, CDK2, CYP1A1, BCL2, MDM2, CDK1, FGFR4, CALM2, NFE2L2, CDKN1C, TOP2A, ACHE, GSK3B, PTEN, HSPB1, PYGM, …	133	12657	18967	1.3408	5.98966e-07	1.99655e-07	1.74547e-07
GOTERM_MF_DIRECT	GO:0019901~protein kinase binding	18	13.5338	1.29542e-07	GSK3B, PARP1, CDKN2A, CAV1, PTEN, HSPB1, RELA, ADRA2A, CASP9, CCNA2, CCND3, CCNB1, CHEK2, E2F1, AKT1, PRKACA, CALM2, TP53	133	521	18967	4.92699	6.38621e-05	1.30109e-05	1.13746e-05
GOTERM_MF_DIRECT	GO:0020037~heme binding	11	8.27068	1.31956e-07	CYP2B6, NOS2, NOS3, CYP1A2, CYP1A1, CYP1B1, HMOX1, CYP3A4, PTGS2, MPO, PTGS1	133	155	18967	10.1206	6.50523e-05	1.30109e-05	1.13746e-05
GOTERM_MF_DIRECT	GO:0031625~ubiquitin protein ligase binding	14	10.5263	3.1341e-07	GSK3B, JUN, PARP1, RELA, NFKBIA, CASP8, ERBB3, CHEK2, MDM2, BCL2, PRKACA, MAP3K7, TP53, NFE2L2	133	315	18967	6.33818	0.000154499	2.57518e-05	2.25133e-05
GOTERM_MF_DIRECT	GO:0061629~RNA polymerase II sequence-specific DNA binding transcription factor binding	11	8.27068	7.52427e-07	GSK3B, AR, JUN, PARP1, CDKN2A, HSPB1, FOS, PPARA, ELK1, TP53, NFE2L2	133	187	18967	8.38877	0.000370878	5.29923e-05	4.6328e-05
GOTERM_MF_DIRECT	GO:0042803~protein homodimerization activity	20	15.0376	1.06745e-06	TOP2A, ACHE, GSTM2, NOS2, PARP1, PON1, ODC1, HSPB1, PTGS2, RELA, ADRA2A, DPP4, CHEK2, BCL2, BAX, AKT1, HMOX1, BAK1, XDH, MCL1	133	749	18967	3.80798	0.000526113	6.57814e-05	5.75087e-05
GOTERM_MF_DIRECT	GO:0004879~RNA polymerase II transcription factor activity, ligand-activated sequence-specific DNA binding	7	5.26316	1.99047e-06	AR, RXRA, PPARG, PPARA, ESR2, NR3C2, PPARD	133	54	18967	18.4864	0.000980821	0.000109033	9.53214e-05
GOTERM_MF_DIRECT	GO:0004712~protein serine/threonine/tyrosine kinase activity	15	11.2782	2.6788e-06	GSK3B, PRKCB, MAPK14, PIK3CG, ERBB3, CHEK2, ERBB2, CHEK1, CDK2, CDK1, AKT1, RAF1, FGFR4, PRKACA, MAP3K7	133	444	18967	4.81787	0.00131978	0.00012154	0.000106255
GOTERM_MF_DIRECT	GO:0004672~protein kinase activity	14	10.5263	2.71184e-06	GSK3B, PRKCB, MAPK14, PIK3CG, ERBB3, CHEK2, ERBB2, CHEK1, CDK2, CDK1, AKT1, RAF1, PRKACA, MAP3K7	133	382	18967	5.22651	0.00133605	0.00012154	0.000106255
GOTERM_MF_DIRECT	GO:0101021~estrogen 2-hydroxylase activity	4	3.00752	3.26151e-06	CYP2B6, CYP1A2, CYP1A1, CYP3A4	133	5	18967	114.087	0.00160664	0.000133994	0.000117143
GOTERM_MF_DIRECT	GO:0043565~sequence-specific DNA binding	13	9.77444	5.20304e-06	FOS, ELK1, ESR2, NR3C2, AR, RXRA, E2F1, BCL2, E2F2, PPARG, PPARA, NFE2L2, PPARD	133	344	18967	5.38929	0.00256182	0.000197315	0.000172501
GOTERM_MF_DIRECT	GO:0003700~transcription factor activity, sequence-specific DNA binding	17	12.782	5.69839e-06	JUN, FOS, ELK1, RELA, ESR2, NFKB1, NR3C2, AR, RXRA, MYC, E2F1, E2F2, PPARG, PPARA, TP53, NFE2L2, PPARD	133	613	18967	3.9549	0.00280537	0.000200665	0.000175429
GOTERM_MF_DIRECT	GO:0000976~transcription regulatory region sequence-specific DNA binding	11	8.27068	6.56309e-06	AR, JUN, RXRA, PPARG, FOS, ELK1, TNF, TP53, RELA, NFKB1, NFE2L2	133	238	18967	6.59117	0.00323039	0.000215707	0.000188579
GOTERM_MF_DIRECT	GO:0008233~peptidase activity	8	6.01504	8.70546e-06	CASP9, CASP7, CASP8, MMP1, CASP3, MMP3, CTSD, MMP9	133	105	18967	10.8654	0.00428262	0.000268237	0.000234503
GOTERM_MF_DIRECT	GO:0003682~chromatin binding	15	11.2782	9.9501e-06	TOP2A, JUN, PCNA, PARP1, PRKCB, FOS, MPO, ELK1, RELA, NFKB1, AR, CDK1, PPARG, TOP1, TP53	133	498	18967	4.29545	0.00489341	0.000288553	0.000252264
GOTERM_MF_DIRECT	GO:0002020~protease binding	8	6.01504	1.41067e-05	DPP4, GSK3B, CASP3, SERPINE1, BCL2, TNF, TP53, F3	133	113	18967	10.0962	0.00693052	0.000386367	0.000337777
GOTERM_MF_DIRECT	GO:0003707~steroid hormone receptor activity	5	3.7594	1.79104e-05	RXRA, PPARA, ESR2, NR3C2, PPARD	133	23	18967	31.002	0.00879102	0.00044337	0.000387611
GOTERM_MF_DIRECT	GO:0101020~estrogen 16-alpha-hydroxylase activity	4	3.00752	1.79866e-05	CYP1A2, CYP1A1, CYP1B1, CYP3A4	133	8	18967	71.3045	0.00882828	0.00044337	0.000387611
GOTERM_MF_DIRECT	GO:0001223~transcription coactivator binding	6	4.51128	2.03771e-05	AR, PPARA, MAP3K7, RELA, NFKB1, PPARD	133	48	18967	17.8261	0.00999574	0.000478378	0.000418217
GOTERM_MF_DIRECT	GO:0004674~protein serine/threonine kinase activity	13	9.77444	2.351e-05	GSK3B, PRKCB, MAPK14, PIK3CG, CHEK2, CHEK1, CDK2, CDK1, AKT1, TOP1, RAF1, PRKACA, MAP3K7	133	400	18967	4.63479	0.0115236	0.000526837	0.000460581
GOTERM_MF_DIRECT	GO:0016301~kinase activity	10	7.5188	3.61569e-05	CDKN1C, GSK3B, PLAU, CDKN2A, CHEK2, ERBB2, CDK1, AKT1, CALM2, PIK3CG	133	232	18967	6.14694	0.0176677	0.000775016	0.000677549
GOTERM_MF_DIRECT	GO:0097153~cysteine-type endopeptidase activity involved in apoptotic process	4	3.00752	3.81511e-05	CASP9, CASP7, CASP8, CASP3	133	10	18967	57.0436	0.0186331	0.000783688	0.00068513
GOTERM_MF_DIRECT	GO:0004252~serine-type endopeptidase activity	9	6.76692	4.99573e-05	DPP4, F10, PLAU, MMP1, MMP2, HGF, MMP3, F3, MMP9	133	187	18967	6.86354	0.0243287	0.000985157	0.000861263
GOTERM_MF_DIRECT	GO:0044877~macromolecular complex binding	12	9.02256	5.65141e-05	CDKN1C, TGFB1, PCNA, CASP8, MYC, CASP3, CAV1, HGF, NUF2, FOS, BAK1, PPARA	133	370	18967	4.62516	0.0274776	0.00107159	0.000936829
GOTERM_MF_DIRECT	GO:0005125~cytokine activity	9	6.76692	6.01771e-05	IL10, IL4, IL1A, TGFB1, IFNG, IL1B, SPP1, TNF, IL2	133	192	18967	6.6848	0.0292324	0.00109879	0.000960605
GOTERM_MF_DIRECT	GO:0019904~protein domain specific binding	10	7.5188	6.85875e-05	CCNA2, IL1B, CHEK1, CDK2, MDM2, TOP1, PPARA, PRKACA, CALM2, NFE2L2	133	252	18967	5.65909	0.0332494	0.00117697	0.00102895
GOTERM_MF_DIRECT	GO:0097200~cysteine-type endopeptidase activity involved in execution phase of apoptosis	4	3.00752	6.92335e-05	CASP9, CASP7, CASP8, CASP3	133	12	18967	47.5363	0.0335573	0.00117697	0.00102895
GOTERM_MF_DIRECT	GO:0070330~aromatase activity	5	3.7594	7.84222e-05	CYP2B6, CYP1A2, CYP1A1, CYP1B1, CYP3A4	133	33	18967	21.6074	0.0379258	0.00128874	0.00112667
GOTERM_MF_DIRECT	GO:0051059~NF-kappaB binding	5	3.7594	0.000111081	NFKBIA, GSK3B, CDKN2A, RELA, PPARD	133	36	18967	19.8068	0.0532935	0.00176655	0.00154439
GOTERM_MF_DIRECT	GO:0001221~transcription cofactor binding	5	3.7594	0.000123877	RXRA, MYC, PPARG, FOS, NFE2L2	133	37	18967	19.2715	0.0592475	0.00190848	0.00166847
GOTERM_MF_DIRECT	GO:0008083~growth factor activity	8	6.01504	0.000169487	IL10, IL4, TGFB1, EGF, HGF, IGF2, VEGFC, IL2	133	167	18967	6.83157	0.0801681	0.00253204	0.00221361
GOTERM_MF_DIRECT	GO:0016491~oxidoreductase activity	9	6.76692	0.000229194	POR, MAOB, NOS2, ADH1C, NOS3, CYP1A2, CYP1A1, CYP3A4, XDH	133	233	18967	5.5085	0.106854	0.00332332	0.00290538
GOTERM_MF_DIRECT	GO:0008270~zinc ion binding	17	12.782	0.000452712	PARP1, ADH1C, PRKCB, MMP1, MMP2, MMP3, MMP9, ESR2, NR3C2, AR, RXRA, CA2, MDM2, PPARG, PPARA, TP53, PPARD	133	888	18967	2.73013	0.200075	0.00637677	0.00557482
GOTERM_MF_DIRECT	GO:0035173~histone kinase activity	3	2.25564	0.00047414	CDK2, CDK1, MAP3K7	133	5	18967	85.5654	0.208485	0.00649308	0.00567651
GOTERM_MF_DIRECT	GO:0070412~R-SMAD binding	4	3.00752	0.000677447	JUN, PARP1, PPARG, FOS	133	25	18967	22.8174	0.284014	0.00902653	0.00789134
GOTERM_MF_DIRECT	GO:0051434~BH3 domain binding	3	2.25564	0.000707965	BCL2, BAX, MCL1	133	6	18967	71.3045	0.294713	0.00918491	0.00802981
GOTERM_MF_DIRECT	GO:0047485~protein N-terminus binding	6	4.51128	0.000951006	TGFB1, PARP1, MDM2, CALM2, TP53, RELA	133	108	18967	7.92272	0.374416	0.0120217	0.0105098
GOTERM_MF_DIRECT	GO:0005496~steroid binding	4	3.00752	0.00116587	AR, CYP3A4, ESR2, NR3C2	133	30	18967	19.0145	0.437355	0.0143693	0.0125622
GOTERM_MF_DIRECT	GO:0050660~flavin adenine dinucleotide binding	5	3.7594	0.00129345	POR, MAOB, NOS2, NOS3, XDH	133	68	18967	10.486	0.471696	0.015553	0.013597
GOTERM_MF_DIRECT	GO:0046982~protein heterodimerization activity	10	7.5188	0.00140461	TOP2A, ERBB3, CAV1, ERBB2, BCL2, BAX, BAK1, TP53, ADRA2A, MCL1	133	381	18967	3.74302	0.499907	0.0164875	0.014414
GOTERM_MF_DIRECT	GO:0001228~transcriptional activator activity, RNA polymerase II transcription regulatory region sequence-specific binding	11	8.27068	0.00204832	AR, JUN, MYC, E2F2, FOS, PPARA, ELK1, TP53, RELA, NFKB1, NFE2L2	133	483	18967	3.24782	0.636094	0.0234843	0.0205309
GOTERM_MF_DIRECT	GO:0004601~peroxidase activity	4	3.00752	0.00215346	PRDX4, PTGS2, MPO, PTGS1	133	37	18967	15.4172	0.654514	0.0241286	0.0210941
GOTERM_MF_DIRECT	GO:0004497~monooxygenase activity	5	3.7594	0.00225016	CYP2B6, CYP1A2, CYP1A1, CYP1B1, CYP3A4	133	79	18967	9.02589	0.670632	0.0244008	0.0213321
GOTERM_MF_DIRECT	GO:0003677~DNA binding	20	15.0376	0.00227844	TOP2A, JUN, PCNA, PARP1, CDKN2A, SOD2, RELA, ESR2, NFKB1, AR, MYC, E2F1, E2F2, PPARG, TOP1, PPARA, TP53, NFE2L2, PPARD, RUNX1T1	133	1337	18967	2.13327	0.675202	0.0244008	0.0213321
GOTERM_MF_DIRECT	GO:0097718~disordered domain specific binding	4	3.00752	0.00232624	CDKN2A, MDM2, CALM2, TP53	133	38	18967	15.0115	0.682784	0.0244008	0.0213321
GOTERM_MF_DIRECT	GO:0097199~cysteine-type endopeptidase activity involved in apoptotic signaling pathway	3	2.25564	0.00253728	CASP9, CASP8, CASP3	133	11	18967	38.8934	0.714202	0.0255282	0.0223177
GOTERM_MF_DIRECT	GO:0034056~estrogen response element binding	3	2.25564	0.00253728	AR, ESR2, NR3C2	133	11	18967	38.8934	0.714202	0.0255282	0.0223177
GOTERM_MF_DIRECT	GO:0004861~cyclin-dependent protein serine/threonine kinase inhibitor activity	3	2.25564	0.0030309	CDKN1C, CDKN2A, CASP3	133	12	18967	35.6523	0.776088	0.0292987	0.025614
GOTERM_MF_DIRECT	GO:0097371~MDM2/MDM4 family protein binding	3	2.25564	0.0030309	CDKN2A, PPARA, TP53	133	12	18967	35.6523	0.776088	0.0292987	0.025614
GOTERM_MF_DIRECT	GO:0005506~iron ion binding	6	4.51128	0.0034665	CYP2B6, CYP1A2, CYP1A1, CYP1B1, CYP3A4, XDH	133	145	18967	5.90106	0.819487	0.0328651	0.0287319
GOTERM_MF_DIRECT	GO:0005524~ATP binding	21	15.7895	0.00483152	TOP2A, GSK3B, PRKCB, ADCY2, MAPK14, ACACB, PIK3CG, HK2, ERBB3, CHEK2, ERBB2, CHEK1, CDK2, CDK1, AKT1, TOP1, RAF1, FGFR4, PRKACA, MAP3K7, NAIP	133	1539	18967	1.94593	0.90816	0.0441675	0.038613
GOTERM_MF_DIRECT	GO:0000978~RNA polymerase II core promoter proximal region sequence-specific DNA binding	18	13.5338	0.00483782	JUN, FOS, ELK1, RELA, ESR2, NFKB1, NR3C2, AR, RXRA, MYC, E2F1, E2F2, PPARG, TOP1, PPARA, TP53, NFE2L2, PPARD	133	1222	18967	2.10062	0.908447	0.0441675	0.038613
GOTERM_MF_DIRECT	GO:0004197~cysteine-type endopeptidase activity	5	3.7594	0.00506805	CASP9, CASP7, CASP8, CASP3, CTSD	133	99	18967	7.20248	0.918316	0.0454281	0.0397151
GOTERM_MF_DIRECT	GO:0010181~FMN binding	3	2.25564	0.00541129	POR, NOS2, NOS3	133	16	18967	26.7392	0.931094	0.0476387	0.0416476
GOTERM_MF_DIRECT	GO:0001216~bacterial-type RNA polymerase transcriptional activator activity, sequence-specific DNA binding	3	2.25564	0.0076067	E2F1, PPARA, TP53	133	19	18967	22.5172	0.976819	0.0657913	0.0575173
GOTERM_MF_DIRECT	GO:0005102~receptor binding	9	6.76692	0.00824471	DPP4, C3, AR, GSTM2, GJA1, CAV1, HGF, SERPINE1, IGFBP6	133	412	18967	3.11525	0.983118	0.0700801	0.0612667
GOTERM_MF_DIRECT	GO:0001227~transcriptional repressor activity, RNA polymerase II transcription regulatory region sequence-specific binding	8	6.01504	0.00935126	JUN, MYC, PPARG, PPARA, TP53, RELA, NFKB1, PPARD	133	337	18967	3.38538	0.990263	0.0781385	0.0683118
GOTERM_MF_DIRECT	GO:0004602~glutathione peroxidase activity	3	2.25564	0.0101368	GSTM2, GSTP1, GSTA1	133	22	18967	19.4467	0.993415	0.0832911	0.0728163
GOTERM_MF_DIRECT	GO:0016712~oxidoreductase activity, acting on paired donors, with incorporation or reduction of molecular oxygen, reduced flavin or flavoprotein as one donor, and incorporation of one atom of oxygen	3	2.25564	0.0120023	CYP2B6, CYP1A2, CYP1B1	133	24	18967	17.8261	0.997402	0.0970025	0.0848034
GOTERM_MF_DIRECT	GO:0097110~scaffold protein binding	4	3.00752	0.0123598	GJA1, CASP8, NOS3, MAP3K7	133	69	18967	8.26719	0.997826	0.0982807	0.0859208
GOTERM_MF_DIRECT	GO:0070576~vitamin D 24-hydroxylase activity	2	1.50376	0.0138708	CYP1A1, CYP3A4	133	2	18967	142.609	0.998978	0.105205	0.0919744
GOTERM_MF_DIRECT	GO:0097472~cyclin-dependent protein kinase activity	2	1.50376	0.0138708	CDK2, CDK1	133	2	18967	142.609	0.998978	0.105205	0.0919744
GOTERM_MF_DIRECT	GO:0004666~prostaglandin-endoperoxide synthase activity	2	1.50376	0.0138708	PTGS2, PTGS1	133	2	18967	142.609	0.998978	0.105205	0.0919744
GOTERM_MF_DIRECT	GO:0002039~p53 binding	4	3.00752	0.0143813	GSK3B, CDKN2A, MDM2, TP53	133	73	18967	7.81419	0.999208	0.107424	0.0939142
GOTERM_MF_DIRECT	GO:0015267~channel activity	3	2.25564	0.0150581	BCL2, BAX, MCL1	133	27	18967	15.8454	0.999436	0.110801	0.0968664
GOTERM_MF_DIRECT	GO:0004364~glutathione transferase activity	3	2.25564	0.0161433	GSTM2, GSTP1, GSTA1	133	28	18967	15.2795	0.999672	0.117039	0.10232
GOTERM_MF_DIRECT	GO:0000981~RNA polymerase II transcription factor activity, sequence-specific DNA binding	17	12.782	0.0169317	JUN, FOS, ELK1, RELA, ESR2, NFKB1, NR3C2, AR, RXRA, MYC, E2F1, E2F2, PPARG, PPARA, TP53, NFE2L2, PPARD	133	1286	18967	1.88519	0.999779	0.120976	0.105762
GOTERM_MF_DIRECT	GO:0004693~cyclin-dependent protein serine/threonine kinase activity	3	2.25564	0.017261	CCND3, CDK2, CDK1	133	29	18967	14.7527	0.999813	0.121567	0.106278
GOTERM_MF_DIRECT	GO:0004175~endopeptidase activity	4	3.00752	0.017745	MMP1, MMP2, MMP3, MMP9	133	79	18967	7.22071	0.999853	0.123215	0.107719
GOTERM_MF_DIRECT	GO:0004517~nitric-oxide synthase activity	2	1.50376	0.0207345	NOS2, NOS3	133	3	18967	95.0727	0.999967	0.140498	0.122829
GOTERM_MF_DIRECT	GO:0016538~cyclin-dependent protein serine/threonine kinase regulator activity	3	2.25564	0.0208039	CCNA2, CCND3, CCNB1	133	32	18967	13.3696	0.999968	0.140498	0.122829
GOTERM_MF_DIRECT	GO:0008395~steroid hydroxylase activity	3	2.25564	0.0233192	CYP2B6, CYP1A1, CYP3A4	133	34	18967	12.5831	0.999991	0.155356	0.135819
GOTERM_MF_DIRECT	GO:0005178~integrin binding	5	3.7594	0.0256573	VCAM1, IL1B, SPP1, ICAM2, IGF2	133	160	18967	4.45653	0.999997	0.166165	0.145268
GOTERM_MF_DIRECT	GO:0019903~protein phosphatase binding	4	3.00752	0.0256787	ERBB2, PPARG, MAPK14, TP53	133	91	18967	6.26853	0.999997	0.166165	0.145268
GOTERM_MF_DIRECT	GO:0005504~fatty acid binding	3	2.25564	0.0259528	GSTM2, GSTP1, GSTA1	133	36	18967	11.8841	0.999998	0.166165	0.145268
GOTERM_MF_DIRECT	GO:0019825~oxygen binding	3	2.25564	0.0273127	CYP1A1, CYP3A4, SOD2	133	37	18967	11.5629	0.999999	0.167685	0.146597
GOTERM_MF_DIRECT	GO:0034875~caffeine oxidase activity	2	1.50376	0.0275507	CYP1A2, CYP3A4	133	4	18967	71.3045	0.999999	0.167685	0.146597
GOTERM_MF_DIRECT	GO:0050692~DBD domain binding	2	1.50376	0.0275507	RXRA, PPARG	133	4	18967	71.3045	0.999999	0.167685	0.146597
GOTERM_MF_DIRECT	GO:0034617~tetrahydrobiopterin binding	2	1.50376	0.0275507	NOS2, NOS3	133	4	18967	71.3045	0.999999	0.167685	0.146597
GOTERM_MF_DIRECT	GO:0004190~aspartic-type endopeptidase activity	3	2.25564	0.0330299	CASP7, CASP3, CTSD	133	41	18967	10.4348	1	0.198582	0.173608
GOTERM_MF_DIRECT	GO:0043125~ErbB-3 class receptor binding	2	1.50376	0.0343199	ERBB3, ERBB2	133	5	18967	57.0436	1	0.202636	0.177153
GOTERM_MF_DIRECT	GO:0030331~estrogen receptor binding	3	2.25564	0.0345262	PCNA, PARP1, PPARG	133	42	18967	10.1864	1	0.202636	0.177153
GOTERM_MF_DIRECT	GO:0050661~NADP binding	3	2.25564	0.0360486	POR, NOS2, NOS3	133	43	18967	9.94947	1	0.209082	0.182788
GOTERM_MF_DIRECT	GO:0060090~binding, bridging	5	3.7594	0.039122	AR, PRDX4, CAV1, BCL2, E2F1	133	183	18967	3.89642	1	0.224269	0.196065
GOTERM_MF_DIRECT	GO:0051525~NFAT protein binding	2	1.50376	0.0410422	MAPK14, PPARA	133	6	18967	47.5363	1	0.22482	0.196547
GOTERM_MF_DIRECT	GO:0008131~primary amine oxidase activity	2	1.50376	0.0410422	VCAM1, MAOB	133	6	18967	47.5363	1	0.22482	0.196547
GOTERM_MF_DIRECT	GO:0032451~demethylase activity	2	1.50376	0.0410422	CYP1A2, CYP1A1	133	6	18967	47.5363	1	0.22482	0.196547
GOTERM_MF_DIRECT	GO:0004064~arylesterase activity	2	1.50376	0.0410422	CA2, PON1	133	6	18967	47.5363	1	0.22482	0.196547
GOTERM_MF_DIRECT	GO:0051087~chaperone binding	4	3.00752	0.0415201	BAX, AHSA1, BAK1, TP53	133	110	18967	5.18578	1	0.224939	0.19665
GOTERM_MF_DIRECT	GO:0004222~metalloendopeptidase activity	4	3.00752	0.0434172	MMP1, MMP2, MMP3, MMP9	133	112	18967	5.09318	1	0.23266	0.2034
GOTERM_MF_DIRECT	GO:0016907~G-protein coupled acetylcholine receptor activity	2	1.50376	0.0477182	CHRM2, CHRM3	133	7	18967	40.7454	1	0.250267	0.218793
GOTERM_MF_DIRECT	GO:0050693~LBD domain binding	2	1.50376	0.0477182	RXRA, PPARG	133	7	18967	40.7454	1	0.250267	0.218793
GOTERM_MF_DIRECT	GO:0030544~Hsp70 protein binding	3	2.25564	0.0491118	CYP1A1, CDK1, BAX	133	51	18967	8.38877	1	0.253505	0.221624
GOTERM_MF_DIRECT	GO:0003690~double-stranded DNA binding	4	3.00752	0.049364	JUN, RXRA, PPARG, TOP1	133	118	18967	4.8342	1	0.253505	0.221624
GOTERM_MF_DIRECT	GO:0043539~protein serine/threonine kinase activator activity	3	2.25564	0.0526084	TGFB1, IGF2, CALM2	133	53	18967	8.07221	1	0.265484	0.232096
GOTERM_MF_DIRECT	GO:0043167~ion binding	2	1.50376	0.054348	RXRA, SPP1	133	8	18967	35.6523	1	0.265484	0.232096
GOTERM_MF_DIRECT	GO:0030235~nitric-oxide synthase regulator activity	2	1.50376	0.054348	AKT1, CALM2	133	8	18967	35.6523	1	0.265484	0.232096
GOTERM_MF_DIRECT	GO:0005113~patched binding	2	1.50376	0.054348	CCNB1, CAV1	133	8	18967	35.6523	1	0.265484	0.232096
GOTERM_MF_DIRECT	GO:0004714~transmembrane receptor protein tyrosine kinase activity	3	2.25564	0.0543891	ERBB3, ERBB2, FGFR4	133	54	18967	7.92272	1	0.265484	0.232096
GOTERM_MF_DIRECT	GO:0000987~core promoter proximal region sequence-specific DNA binding	3	2.25564	0.0617197	E2F1, E2F2, TP53	133	58	18967	7.37633	1	0.295415	0.258264
GOTERM_MF_DIRECT	GO:0005080~protein kinase C binding	3	2.25564	0.0617197	TOP2A, PRKCB, HSPB1	133	58	18967	7.37633	1	0.295415	0.258264
GOTERM_MF_DIRECT	GO:0042826~histone deacetylase binding	4	3.00752	0.0667517	TOP2A, PARP1, TP53, RELA	133	134	18967	4.25699	1	0.316428	0.276634
GOTERM_MF_DIRECT	GO:0016705~oxidoreductase activity, acting on paired donors, with incorporation or reduction of molecular oxygen	3	2.25564	0.0674252	CYP2B6, CYP1B1, CYP3A4	133	61	18967	7.01356	1	0.316577	0.276764
GOTERM_MF_DIRECT	GO:0042166~acetylcholine binding	2	1.50376	0.0739638	ACHE, CHRM3	133	11	18967	25.9289	1	0.337631	0.29517
GOTERM_MF_DIRECT	GO:0034618~arginine binding	2	1.50376	0.0739638	NOS2, NOS3	133	11	18967	25.9289	1	0.337631	0.29517
GOTERM_MF_DIRECT	GO:0005114~type II transforming growth factor beta receptor binding	2	1.50376	0.0739638	TGFB1, MAP3K7	133	11	18967	25.9289	1	0.337631	0.29517
GOTERM_MF_DIRECT	GO:0030971~receptor tyrosine kinase binding	3	2.25564	0.0773016	PCNA, MAP3K7, TP53	133	66	18967	6.48223	1	0.346452	0.302882
GOTERM_MF_DIRECT	GO:0048018~receptor agonist activity	3	2.25564	0.0773016	EGF, IGF2, CXCL13	133	66	18967	6.48223	1	0.346452	0.302882
GOTERM_MF_DIRECT	GO:0042805~actinin binding	2	1.50376	0.0804123	RELA, NFKB1	133	12	18967	23.7682	1	0.348841	0.304971
GOTERM_MF_DIRECT	GO:0016504~peptidase activator activity	2	1.50376	0.0804123	CAV1, PCOLCE	133	12	18967	23.7682	1	0.348841	0.304971
GOTERM_MF_DIRECT	GO:0000287~magnesium ion binding	5	3.7594	0.0809067	TOP2A, CDK2, ADCY2, PRKACA, MAP3K7	133	234	18967	3.0472	1	0.348841	0.304971
GOTERM_MF_DIRECT	GO:0005518~collagen binding	3	2.25564	0.0813728	ACHE, PCOLCE, MMP9	133	68	18967	6.29157	1	0.348841	0.304971
GOTERM_MF_DIRECT	GO:0042277~peptide binding	3	2.25564	0.0813728	RXRA, PPARG, RELA	133	68	18967	6.29157	1	0.348841	0.304971
GOTERM_MF_DIRECT	GO:0009055~electron carrier activity	3	2.25564	0.0834328	POR, MAOB, CYP1A2	133	69	18967	6.20039	1	0.35459	0.309996
GOTERM_MF_DIRECT	GO:0008179~adenylate cyclase binding	2	1.50376	0.0868162	ADCY2, CALM2	133	13	18967	21.9398	1	0.362916	0.317276
GOTERM_MF_DIRECT	GO:0030145~manganese ion binding	3	2.25564	0.0876004	ADCY2, SOD2, PRKACA	133	71	18967	6.02573	1	0.362916	0.317276
GOTERM_MF_DIRECT	GO:0008237~metallopeptidase activity	3	2.25564	0.0876004	MMP2, MMP3, MMP9	133	71	18967	6.02573	1	0.362916	0.317276
GOTERM_MF_DIRECT	GO:0016702~oxidoreductase activity, acting on single donors with incorporation of molecular oxygen, incorporation of two atoms of oxygen	2	1.50376	0.0931758	PTGS2, PTGS1	133	14	18967	20.3727	1	0.382797	0.334656
GOTERM_MF_DIRECT	GO:0043621~protein self-association	3	2.25564	0.0939657	ACHE, PPARG, TP53	133	74	18967	5.78145	1	0.382852	0.334704
GOTERM_MF_DIRECT	GO:1990837~sequence-specific double-stranded DNA binding	8	6.01504	0.0963969	JUN, RXRA, E2F1, E2F2, FOS, ELK1, NR3C2, PPARD	133	560	18967	2.03727	1	0.389538	0.34055
GOTERM_MF_DIRECT	GO:0005149~interleukin-1 receptor binding	2	1.50376	0.0994914	IL1A, IL1B	133	15	18967	19.0145	1	0.395559	0.345813
GOTERM_MF_DIRECT	GO:0050998~nitric-oxide synthase binding	2	1.50376	0.0994914	CAV1, CALM2	133	15	18967	19.0145	1	0.395559	0.345813
